# Supplementary material for: Barriers and facilitators to the implementation of a community-based, multidisciplinary, family-focused childhood weight management programme in Ireland: a qualitative study
Source: PubMed Central journal article supplement — BMJ Open. 2017 Aug 28;7(8):e016459. doi: 10.1136/bmjopen-2017-016459 (PMC5623413; doi:10.1136/bmjopen-2017-016459), 2017-08-28
Supplement: bmjopen-2017-016459.draft_revisions.pdf [file bmjopen-2017-016459.draft_revisions.pdf]

# BMJ Open

BMJ Open is committed to open peer review. As part of this commitment we make the peer review history of every article we publish publicly available.

When an article is published we post the peer reviewers' comments and the authors' responses online. We also post the versions of the paper that were used during peer review. These are the versions that the peer review comments apply to.

The versions of the paper that follow are the versions that were submitted during the peer review process. They are not the versions of record or the final published versions. They should not be cited or distributed as the published version of this manuscript.

BMJ Open is an open access journal and the full, final, typeset and author-corrected version of record of the manuscript is available on our site with no access controls, subscription charges or pay-per-view fees (<http://bmjopen.bmj.com>).

If you have any questions on BMJ Open's open peer review process please email [editorial.bmjopen@bmj.com](mailto:editorial.bmjopen@bmj.com)

# BMJ Open

## Implementation of a community-based, multidisciplinary, family-focused childhood weight management programme: Barriers and facilitators for success

|                                 |                                                                                                                                                                                                                                                                                                                                                                                      |
|---------------------------------|--------------------------------------------------------------------------------------------------------------------------------------------------------------------------------------------------------------------------------------------------------------------------------------------------------------------------------------------------------------------------------------|
| Journal:                        | <i>BMJ Open</i>                                                                                                                                                                                                                                                                                                                                                                      |
| Manuscript ID                   | bmjopen-2017-016459                                                                                                                                                                                                                                                                                                                                                                  |
| Article Type:                   | Research                                                                                                                                                                                                                                                                                                                                                                             |
| Date Submitted by the Author:   | 16-Feb-2017                                                                                                                                                                                                                                                                                                                                                                          |
| Complete List of Authors:       | Kelleher, Emily; University College Cork, Epidemiology and Public Health<br>Harrington, Janas; University College Cork, Epidemiology and Public Health<br>Shiely, Frances; University College Cork, Epidemiology and Public Health<br>Perry, Ivan; University College Cork, Epidemiology and Public Health<br>Mc Hugh, Sheena; University College Cork, Epidemiology & Public Health |
| <b>Primary Subject Heading</b>: | Paediatrics                                                                                                                                                                                                                                                                                                                                                                          |
| Secondary Subject Heading:      | Qualitative research, Health services research, Public health                                                                                                                                                                                                                                                                                                                        |
| Keywords:                       | Implementation, barriers, facilitators, childhood, obesity, community                                                                                                                                                                                                                                                                                                                |
|                                 |                                                                                                                                                                                                                                                                                                                                                                                      |

SCHOLARONE™  
Manuscripts

1  
2  
3 Title:  
4

5 Implementation of a community-based, multidisciplinary, family-focused childhood weight management  
6 programme: Barriers and facilitators for success  
7  
8

9  
10 Corresponding Author:  
11

12 Emily Kelleher, MPH BSc, Department of Epidemiology and Public Health, 4<sup>th</sup> Floor, Western Gateway Building,  
13 University College Cork, Ireland. Email: [emily.kelleher@ucc.ie](mailto:emily.kelleher@ucc.ie) Tel: 00353 (21) 4205517  
14  
15

16  
17 Authors:  
18

19 Emily Kelleher, Department of Epidemiology and Public Health, University College Cork, Ireland  
20

21  
22 Janas M Harrington, Department of Epidemiology and Public Health, University College Cork, Ireland  
23

24  
25 Frances Shiely, Department of Epidemiology and Public Health, University College Cork and HRB Clinical  
26 Research Facility, Mercy University Hospital, Grenville Place, Cork, Ireland  
27

28  
29 Ivan J Perry, Department of Epidemiology and Public Health, University College Cork, Ireland  
30

31  
32 Sheena M McHugh, Department of Epidemiology and Public Health, University College Cork, Ireland  
33  
34

35 Word Count:  
36

37 4159  
38  
39

40 Keywords:  
41

42 Implementation; barriers; facilitators; childhood; obesity; community; treatment  
43  
44  
45  
46  
47  
48  
49  
50  
51  
52  
53  
54  
55  
56  
57  
58  
59  
60

**ABSTRACT:**

**Objective:** To explore the barriers and facilitators experienced by those implementing a government-funded, community-based, childhood weight management programme.

**Design:** Qualitative using semi-structured interviews.

**Setting:** Two geographical regions in the south and west of the Republic of Ireland.

**Participants:** 29 national and local level stakeholders responsible for implementing the programme including professionals from dietetics, psychology, public health nursing, physiotherapy, health promotion and administration.

**Methods:** Framework analysis was used to identify barriers and facilitators which were mapped onto six levels of factors influencing implementation outlined by Grol and Wensing: the innovation, the individual professional, the patient, the social context, the organisational context, and the external environment.

**Results:** Most barriers occurred at the level of the organisational context. For all stakeholders, barriers arose due to the multidisciplinary nature of the programme, including the lack of role clarity and added complexity of working in different locations. Health professionals' low-perceived self-efficacy in approaching the subject of weight with parents and parental resistance to hearing about their child's weight status were barriers to programme implementation at the individual professional and patient levels, respectively. The main facilitators of implementation, occurring at the level of the health professional, included stakeholders' recognition of the need for a weight management programme and personal interest in the area of childhood obesity. Having a local lead and supportive colleagues were further implementation drivers.

**Conclusions:** This study highlights the complexities associated with implementing a multidisciplinary childhood weight management programme, particularly translating such programmes to a community setting. Our results suggest the assignment of clear roles and responsibilities, the provision of sufficient practical training and resources, and organisational support play pivotal roles in overcoming barriers to change. This evidence can be used to develop an implementation plan to support the translation of interventions into real world settings.

**KEYWORDS:**

Implementation; barriers; facilitators; childhood; obesity; community

**ARTICLE SUMMARY****Article Focus**

- International agencies recommend multi-component programmes to treat and manage childhood obesity.
- These recommendations are largely based on small-scale studies conducted in controlled settings with specialised staff, thus limiting their applicability and generalizability to the real-world.
- When introduced under less-controlled conditions, insight into the factors influencing implementation is crucial. Therefore, the aim of this study was to explore and categorise the barriers and facilitators experienced by those implementing a government-funded, community-based, multi-component childhood weight management pilot programme to inform their eventual scale up.

**Strengths and limitations**

- While this paper describes barriers and facilitators from the perspective of a wide range of stakeholders and provided a thorough overview of the relevant issues, the themes that emerged were relatively homogenous across disciplines which added to the authority of the findings.
- Data were analysed using a systematic approach [1] and an adapted version of the recognised implementation model by Grol and Wensing was used to classify the barriers and facilitators into levels [2].

**BACKGROUND:**

Childhood obesity is a worldwide public health concern and there is now widespread agreement that the complex aetiology of the issue requires a multifaceted approach to treatment [4-6]. International recommendations agree that initiatives to treat and manage childhood obesity should be family-focused and

1  
2  
3 combine healthy eating, physical activity and behavioural components [7]. In 2016, the World Health  
4 Organisation published their report of the commission on ending childhood obesity within which they echo  
5 these recommendations but also add that they should be delivered by “*multi-professional teams with*  
6 *appropriate training and resources*” [8]pg.11. These recommendations, however, have been largely based on  
7 small-scale studies conducted in controlled settings with specialised staff, thus limiting their applicability and  
8 generalizability to ‘real-world’ settings such as communities or hospitals [5].  
9  
10  
11  
12  
13

14  
15 In public health, once interventions have undergone innovation testing and demonstrated efficacy the next  
16 steps include replication and ‘scale-up’ to larger populations in ‘real-world’ settings [9]. There are relatively  
17 few examples of published studies reporting on the pragmatic application of effective childhood obesity  
18 treatment programmes [10, 11]. While implementation issues such as engagement, local context, staffing and  
19 funding are likely to be common across many public health interventions [11], little is documented about the  
20 experience of those implementing childhood weight management programmes and even fewer studies detail  
21 the factors influencing implementation [12]. For example, a lack of providers trained in evidence-based care  
22 for childhood obesity was listed by delegates attending a recent conference in the United States as a major  
23 barrier to treatment implementation [6]. Furthermore, with the majority of families declining referral and up  
24 to 75% of families discontinuing care, poor engagement with families has proven to be a significant challenge  
25 facing teams tasked with implementing such programmes [13, 14].  
26  
27  
28  
29  
30  
31  
32  
33  
34  
35  
36

37 When introduced under less-controlled conditions, insight into the factors influencing implementation is  
38 crucial. Therefore, the aim of this study was to explore and categorise the barriers and facilitators experienced  
39 by those implementing a government-funded, community-based, multi-component childhood weight  
40 management pilot programme to inform their eventual scale up.  
41  
42  
43  
44  
45

## 46 **METHODS:**

### 47 **Intervention and context**

48  
49 Although trends appear to be stabilising in Ireland, prevalence of childhood obesity remains high [15].  
50 Currently, in Ireland, almost one in four children are either overweight or obese [16] and there is no  
51 standardised community-based weight management programme available to those children with obesity.  
52 Community programmes are usually provided on an ad-hoc basis and are rarely evaluated or sustained. In an  
53  
54  
55  
56  
57  
58  
59  
60

1  
2  
3 attempt to provide universal treatment the Irish Health Service Executive (HSE) planned to pilot the *W82GO-*  
4 *community* programme in two communities with the intention of rolling the programme out nationwide after  
5 pilot programme completion.  
6  
7

8  
9  
10 *W82GO* aims to improve nutrition, increase physical activity and facilitate behaviour change over one year  
11 [17]. It was designed as a hospital-based, family-focused, multidisciplinary programme grounded in  
12 behavioural change theory and was modelled on best practice recommendations [5, 7, 8]. The primary goal is a  
13 reduction in Body Mass Index Standard Deviation Score and has previously been found to be effective when  
14 delivered in a hospital out-patient setting [17].  
15  
16  
17

18  
19  
20 The *W82GO* programme involves an initial individual assessment to ascertain eligibility followed by two  
21 phases. Phase 1 is the initial intensive phase and consists of six weekly group sessions for both the child and  
22 his/her parent/carer. These sessions last approximately one and a half to two hours and incorporate  
23 educational and practical sessions to increase physical activity, improve nutrition and increase sleep. Upon  
24 completion of phase 1, children return with their parents/care-givers for three booster group sessions at three,  
25 six and nine months. These sessions aim to encourage the family to continue with lifestyle change and to  
26 manage any barriers to change. Finally, at 12 months, the children and their parents/care-givers return for a  
27 final individual assessment to document any changes and make plans for sustainment.  
28  
29  
30  
31  
32  
33  
34  
35

36 For the current study, *W82GO* was adapted and implemented in two community sites (Site A and Site B) from  
37 April 2015 for 12 months and subsequently renamed *W82GO-community*. Both sites were chosen as they were  
38 part of a national pilot growth measurement programme and included a mix of rural and urban towns in the  
39 west and south of Ireland. Initial assessments took place in community healthcare offices while subsequent  
40 group sessions were delivered on weekdays in the afternoon at a local sports or community centre. The  
41 programme was offered free of charge and was delivered by a multidisciplinary team of community health  
42 professionals including dietitians, physiotherapists, public health nurses, psychologists, health promotion  
43 officers and area medical officers. These health professionals were invited to take part in a training  
44 programme prior to programme commencement. Training included a needs assessment, a one day  
45 educational training course and two days of clinical shadowing with an experienced *W82GO* programme  
46 practitioner at the National Children's University Hospital where it was developed. Each community  
47  
48  
49  
50  
51  
52  
53  
54  
55  
56  
57  
58  
59  
60

1  
2  
3 practitioner was supplied with a user manual which outlined the programme and detailed the content for both  
4  
5 phases.

### 6 7 **Study design and sample**

8  
9  
10 A qualitative approach using semi-structured interviews was utilised. All stakeholders involved in  
11  
12 implementing the *W82GO-community* pilot programme (n=38) were contacted by email in the first instance  
13  
14 and followed up by telephone contact during which the researcher outlined the study aims and methodology.  
15  
16 Stakeholders included professionals from dietetics, clinical psychology, public health nursing, physiotherapy,  
17  
18 health promotion, administration as well as individuals from both national and local-level management.

### 19 20 **Data collection**

21  
22  
23 All participants were invited to take part in face-to-face interviews. However, due to time and scheduling  
24  
25 difficulties a mixture of telephone (n=22) and face-to-face (n=7) interviews were conducted between August  
26  
27 2015 and February 2016 (during programme implementation). To ensure consistency all interviews were  
28  
29 conducted by a single researcher (EK), trained in qualitative research methods, using a semi structured topic  
30  
31 guide. This guide was developed based on relevant literature and focused on seven issues: (1) awareness of  
32  
33 the issue of childhood obesity and existing healthy lifestyle programmes, (2) perceived value of and interest in  
34  
35 community evidence-based treatment programmes, (3) communication of the *W82GO-community* pilot  
36  
37 programme; (4) specific role in implementing *W82GO-community*; (5) barriers and enablers to  
38  
39 implementation; (6) perceived successes and challenges experienced and finally (7) recommendations for the  
40  
41 future roll-out of childhood weight management programmes in Irish communities. Stakeholders were  
42  
43 specifically asked to report on the barriers and facilitators to inform the implementation and eventual scale-up  
44  
45 of community-based obesity treatment programmes. Prompts and probes were used throughout the  
46  
47 interviews to stimulate discussion. Prior to each interview, participants were informed about the purpose of  
48  
49 the study, that participation was voluntary and that they could terminate the interview at any stage for any  
50  
51 reason. Signed informed consent was obtained before each interview, which lasted on average 45 minutes.  
52  
53 Interviews continued until data saturation was reached, that is when no new themes emerged during the  
54  
55 preliminary analysis of three consecutive interviews [18]. Interviews were digitally recorded and transcribed  
56  
57 verbatim.  
58  
59  
60



### Data Analysis

Framework analysis was used to analyse the data [1]. This approach enabled the investigation of a priori objectives while also allowing new themes to emerge from the data. One researcher (EK) transcribed and coded each transcript while another (SMH) also undertook initial coding of a selection of transcripts. Similarities and differences between the coding labels and definitions were discussed and the coding framework was refined and applied to the remaining interviews. Codes were synthesised and grouped according to the dominant emergent themes. These themes were mapped onto a framework developed by Grol and Wensing (2004) which specifies six levels of factors that facilitate or impede implementation success: the innovation; the individual professional, the patient; the social context; the organisational context; and the economic and political environment [2]. This framework (Table 1) was chosen because it describes how barriers and facilitators can be identified, categorised, and used for the development of tailored-based implementation strategies to facilitate desired change [2], in this instance implementing the *W82GO-community* programme. Discrepancies on the mapping of themes were discussed until consensus was reached. NVivo (QSR v10) was used to manage data analysis.

**Table 1 Barriers to and incentives for change at different levels of healthcare<sup>a</sup>**

| Level                          | Barriers / Incentives                                                           |
|--------------------------------|---------------------------------------------------------------------------------|
| Innovation                     | Advantages in practice, feasibility, credibility, attractiveness, accessibility |
| Individual Practitioner        | Awareness, knowledge, attitude, motivation to change, behavioural routines      |
| Patient                        | Knowledge, skills, attitude, compliance                                         |
| Social Context                 | Opinion of colleagues, culture of the network, collaboration, leadership        |
| Organisational Context         | Organisation of care processes, staff, capacities, resources, structures        |
| Economic and Political Context | Financial arrangements, regulations, policies                                   |

<sup>a</sup>*Grol and Wensing's multilevel model[2]*

## RESULTS

### Stakeholder Characteristics

We contacted 38 stakeholders and recruited 29 interviewees from a range of disciplines and professions, yielding a response rate of 76% (Table 2).

Table 2 Stakeholder characteristics

|                           | Site A | Site B | National | Total |
|---------------------------|--------|--------|----------|-------|
| National Manager          | NA     | NA     | 1        | 1     |
| Local Manager             | 1      | 1      | x        | 2     |
| Physiotherapists          | 2      | 1      | 1        | 4     |
| Dietitians                | 3      | x      | x        | 3     |
| Psychologists             | 1      | 1      | 1        | 3     |
| Public Health Nurses      | 6      | 3      | x        | 9     |
| Area Medical Officers     | x      | 1      | x        | 1     |
| Health Promotion Officers | 3      | 1      | x        | 4     |
| Administration            | 1      | x      | 1        | 2     |
| Total                     | 17     | 8      | 4        | 29    |

### Barriers and Facilitators

For all participants, barriers arose due to the multidisciplinary nature of the programme, including the lack of understanding of other disciplines, lack of role clarity as well as the added complexities of working in different locations. Participants' recognition of the need for a childhood obesity programme and their own personal interest in the area were the main drivers of implementation while the presence of a local lead and supportive colleagues were further enabling factors. Table 3 presents the perceived barriers and facilitators from the perspective of the stakeholders mapped onto the six implementation levels with quotations to illustrate each level.

INSERT TABLE 3 – Included as a supplementary file

### The Innovation

In terms of the *W82GO-community* pilot programme (innovation), while stakeholders believed it came from a credible source having been developed by one of the national children's hospitals in Ireland, many had doubts over its accessibility and about how well it would transfer to the community setting. This uncertainty resulted in feelings of unease and community practitioners were hesitant to get involved initially. One stakeholder explained how she worried at length about what impact the programme would have on existing services and how feasible it was to run in the community; *"The setting is different. We were taking a programme that was from an acute setting into the community - that possibly was where the breakdown happened because you didn't have the same services. You didn't have people on site. There was travel, there was all these other*

1  
2  
3 logistics that weren't thought about when they were moving an acute programme to the community",  
4  
5 W82GO021. In particular, stakeholders believed they were dealing with a very different cohort of families than  
6  
7 the hospital-based programme as described by the following quote; "You've a very different kind of child  
8  
9 coming into the hospital than you do in the general community. You've a very different kind of parent. Even if  
10  
11 you'd a parent who was resistant to hearing about their child being overweight, if they are attending hospital  
12  
13 appointments regularly they are obviously already engaged about their child's health... so I believe that's a  
14  
15 major barrier straight away that they possibly didn't have to face in the hospital you know?", W82GO010.

16  
17 In addition to the differences in the target group, stakeholders believed the programme was too medicalised  
18  
19 for the community setting and some felt it didn't fit with their perception of a healthy lifestyle programme.  
20  
21 This was due to the number of health professionals involved and in particular, the involvement of medical  
22  
23 staff. Furthermore, many stakeholders thought the collection of clinical markers of disease and medical history  
24  
25 during the initial assessments was unnecessary. As one stakeholder described; "the initial assessments were  
26  
27 totally irrelevant. I mean when I heard that bloods were being taken I thought oh for God sake. You know we  
28  
29 were supposed to be running a community-based education intervention where the focus should be on  
30  
31 changing lifestyles. It's not our job to be diagnosing other problems", W82GO005.

### 32 33 Individual Professional

34  
35 While stakeholders both applauded and recognised the need for such an approach to the treatment of  
36  
37 childhood obesity, the multidisciplinary nature of the programme created significant barriers to programme  
38  
39 implementation. The variety of community health professionals involved in the implementation of W82GO-  
40  
41 community with differing perspectives and priorities led to role uncertainty and in some cases a perception of  
42  
43 disrespect between disciplines. One stakeholder captures this theme in the following quote; "I suppose the  
44  
45 other main challenge was the multidisciplinary nature of the programme. I think the challenge is when you put  
46  
47 together a team obviously from all different backgrounds not with different agendas but with different  
48  
49 experiences and knowledge and different perspectives", W82GO026. Stakeholders described how "there was  
50  
51 quite a lack of understanding of the various discipline roles and responsibilities and some were even unsure of  
52  
53 what some disciplines did", W82GO012. This lack of understanding sometimes resulted in tension between  
54  
55 disciplines and created a challenging environment to work in. Others recalled feeling concerned about where  
56  
57  
58  
59  
60

1  
2  
3 they fit into the programme and believed a structured programme plan outlining specific roles and  
4  
5 responsibilities was lacking.  
6

7  
8 Another key barrier that emerged at the level of the individual professional was their low perceived self-  
9  
10 efficacy in dealing with childhood obesity and/or working with this young age group. In particular, many  
11  
12 stakeholders reported their fear of approaching the subject with parents given the risk of upsetting them or  
13  
14 *“rocking the boat”*. One stakeholder reported that *“it’s something you want to do something about but it can  
15  
16 be very difficult to approach the subject with parents. It’s a very sensitive issue”*, W82GO001. In our study,  
17  
18 stakeholders in Site A received motivational interviewing workshops for childhood obesity. This training  
19  
20 equipped these stakeholders with increased skills and confidence in working with families on weight  
21  
22 management issues. As one stakeholder described, post motivational interviewing training she wasn’t  
23  
24 *“frightened of dealing with them at all. It’s kind of second nature to me now... I know the buzz words, I know  
25  
26 exactly what to say to them. And body language, the whole lot”*, W82GO002. Others felt it was quite ‘alien’ to  
27  
28 work with children aged 4-6 years and believed they hadn’t the appropriate training to do so.

29  
30 Despite these barriers, all stakeholders were aware that childhood obesity was an issue in their respective  
31  
32 communities and recognised the urgent need for treatment; *“Yeah I think it’s a time bomb that went off over  
33  
34 the past ten years and that we are behind it, way behind and the sooner we get going and doing whatever we  
35  
36 can the better”*, W82GO012. Furthermore, stakeholders’ personal interest in tackling the issue, and their  
37  
38 motivation and dedication to seeing the programme through were what many believed to be the main drivers  
39  
40 behind programme completion; *“It went ahead due to a lot of determination and not because it was easily  
41  
42 implementable... if that’s a word”*, W82GO014.

#### 43 44 **Patient**

45  
46 Low programme uptake was a key issue during implementation. Many stakeholders believe that obesity has  
47  
48 become the norm in society and as a result *“people don’t recognise overweight people as being in that actual  
49  
50 overweight category because it’s become normal to be surrounded by overweight people”*, W82GO021. In  
51  
52 terms of the W82GO-community pilot programme, almost all stakeholders indicated that although children  
53  
54 measured as obese on the growth charts their parents seemed unaware of any excess weight and once  
55  
56 informed, many refused to accept that their child was obese. As a result of this misperception parents didn’t  
57  
58  
59  
60

1  
2  
3 realise or accept the need for treatment. Speaking of her experience, one stakeholder described how *“other*  
4 *parents just didn’t reply or didn’t get in touch because they believed everything was ok and there wasn’t a*  
5 *problem with their child. They didn’t need any programme. I think that definitely was a huge problem out there*  
6 *in the community setting”,* W82GO012. Because of this low recognition amongst parents, many stakeholders  
7 recalled the resistance they faced when trying to discuss the issue with them and their fear prior to making  
8 contact with parents. One stakeholder explained how some parents would *“be really angry so you’re taking*  
9 *angry phonecalls in the evening. You know when you come in from a day’s work so it was really difficult”,*  
10 W82GO002.

### 19 **Social Context**

20  
21 Local level stakeholders believed there was a certain level of *“naïvety”* at national level about the reality of  
22 rolling out the pilot programme on the ground. They felt consultation during the planning stage was lacking  
23 and that national-level stakeholders had *“little experience of the practical aspects of childhood obesity”* as *“no*  
24 *one was actually working with obese children or even groups on a day to day basis”,* W82GO004. As a result  
25 unrealistic expectations and timeframes prevailed, particularly during the recruitment phase. This led to  
26 frustration and confusion among local-level health professionals during implementation.

27  
28 Communication between national and local level stakeholders was considered poor. However, the presence of  
29 a local lead facilitated the exchange between staff on the ground and management at national level and was  
30 seen by almost all stakeholders as crucial for programme implementation. Furthermore, stakeholders felt that  
31 because of the multidisciplinary approach of the programme *“you needed someone on the ground”*; if they  
32 didn’t have a local lead *“pulling all those people and bits together, it wouldn’t have worked because running*  
33 *something like this with people dispersed across a whole county and city is difficult”,* W82GO005. The presence  
34 of supportive colleagues and management were identified as further enabling factors.

### 48 **Organisational Context**

49  
50 The multidisciplinary structure of the programme also created barriers at the organisational level. In addition  
51 to differing individual perspectives and priorities, the added complexities of working in different locations  
52 created difficulties during programme implementation. In many cases stakeholders didn’t *“work at the same*  
53  
54  
55  
56  
57  
58  
59  
60

1  
2  
3 *site... or even the same town which was a challenge” as it “took up a lot of time organising between schedules*  
4 *and travelling to meet and go through practicalities”, W82GO007.*  
5  
6

7  
8 In addition to these challenges, at the organisational level, stakeholders reported that implementation was  
9 hampered due to insufficient resources (i.e. staff and time) and training. It was reported that two other  
10 proposed areas withdrew from the pilot programme because of the lack of staff and leadership on the ground  
11 to run the programme. Stakeholders felt that they had very different resource issues to the hospital-based  
12 teams who are *“within the confines of a hospital... so they would or should have the same vision or focus...  
13 whereas we can see now with a community based programme the professionals can be very different in their  
14 training, they can have a different ethos in the departments within their community. It’s very individual. We  
15 have different line managers and different resources to deal with”, W82GO011.* Some stakeholders *“didn’t  
16 want to get involved because of existing workloads”,* and the lack of extra resources or allocated time to  
17 implement the pilot. Furthermore, while acknowledging the little time hospital staff had to develop  
18 community-specific training, local-level stakeholders felt they needed more *“practical and tailored”*  
19 information. Many described the training they received as *‘too general’* and stated that *“it would have been  
20 very helpful to have had more practical tips on how to actually run the programme session to session with this  
21 age group”, W82GO012.*  
22  
23  
24  
25  
26  
27  
28  
29  
30  
31  
32  
33  
34

### 35 **External Environment**

36  
37  
38 In the Grol and Wensing model, the ‘economic and political context’ refers to financial arrangements,  
39 regulations and policies - themes which did not emerge during our research. Therefore, the sixth level was  
40 renamed ‘external environment’ to include wider societal perspectives and determinants.  
41  
42  
43

44  
45 In terms of the external environment, the lack of existing services to treat and manage childhood obesity  
46 meant many stakeholders were excited to come on board and implement this new initiative. One stakeholder  
47 described *“waiting for years for something to happen in this area”, W82GO005.* The media was recognised as  
48 both a barrier and a facilitator to programme implementation. While stakeholders believed TV and radio  
49 campaigns have the potential to raise awareness they felt that the issue is *“also getting very bad press”* and  
50 being *“hyped up a little bit”* which in itself may make it more difficult for parents to come forward.  
51  
52  
53  
54  
55  
56 Additionally, staff felt that the stigma surrounding childhood obesity and weight management programmes  
57  
58  
59  
60

1  
2  
3 created a significant barrier to programme implementation as many parents were reluctant to attend or even  
4 talk about the issue of weight for fear of singling out or 'labelling' their child.  
5  
6

### 7 8 **Vision for the future**

9  
10 In terms of the future scale up of *W82GO-community*, the majority of stakeholders recommend establishing  
11 dedicated childhood obesity teams within the community, "ideally people who are located at least in the same  
12 town", who can offer a range of interventions for different levels of need. One stakeholder described "a tiered  
13 effect, for example there could be a level one which could be a generic workshop or talk that you could roll-out  
14 in lots of schools. A level two then would be a seminar for parents and level three would be a group  
15 programme. Level four then could be actual specific one on one interventions". Having a tiered approach would  
16 enable the team to match the level of need with the family and allow families to choose where on the scale  
17 they would best fit.  
18  
19  
20  
21  
22  
23  
24

### 25 26 **DISCUSSION**

27  
28 Ambiguity surrounds the effectiveness of community-based childhood weight management programmes [19],  
29 and little is documented of the factors influencing their implementation in real-world settings. Their impact on  
30 public health depends on their implementation at a national scale and therefore knowledge of the  
31 determinants affecting implementation is required [20]. This study identified factors that hampered and  
32 facilitated the implementation of *W82GO-community* from a wide range of stakeholder perspectives. Findings  
33 suggest that more consideration is needed during the planning stages, including the creation of a structured  
34 programme plan outlining specific roles and responsibilities. Local-level stakeholders believe they should be  
35 involved in this process as they have practical experience of working with families on the ground in their  
36 respective communities.  
37  
38  
39  
40  
41  
42  
43  
44  
45  
46

47 A key barrier to the implementation of *W82GO-community* was parental resistance which occurred at the  
48 patient level but is also intrinsically linked to the external environment where the increasing normalisation of  
49 overweight and obesity is met with a stigma that surrounds the issue. Stakeholders described parental  
50 resistance occurring at every stage of the implementation process. Parents did not appear to recognise the  
51 issue in their own children and as a result didn't see the need for treatment or refused to accept that their  
52 child was carrying excess weight. Lack of parental awareness regarding their child's weight and resistance  
53  
54  
55  
56  
57  
58  
59  
60

1  
2  
3 towards discussing weight issues has been documented in previous research [21-25]. This may be due in part  
4  
5 to the belief that obesity has become the norm in society, a point which was suggested by stakeholders in this  
6  
7 study, and previously outlined in the literature [26]. It is also possible that parental resistance stems from the  
8  
9 stigma that is associated with excess weight and obesity [11, 22-24] or the negative media attention obesity  
10  
11 has received. The framing of coverage by media may affect people's views about the causes of childhood  
12  
13 obesity and the most appropriate strategies for addressing the problem [27]. This finding highlights the need,  
14  
15 at a policy level, for positive awareness-raising campaigns to encourage parental recognition of healthy  
16  
17 childhood growth and development, in addition to knowledge regarding the importance of identifying obesity  
18  
19 early in childhood. Future research should focus on factors influencing family's decisions to engage or  
20  
21 disengage with obesity treatment and provide recommendations on how to encourage participation.

22  
23 Low perceived self-efficacy in approaching the subject of weight with parents was a barrier facing staff during  
24  
25 implementation. Stakeholders in this study see the need for a childhood weight management programme in  
26  
27 their communities and acknowledge their professional responsibility to get involved. However, they appear  
28  
29 uncomfortable and unequipped to do this. This is consistent with previous research which found that low  
30  
31 perceived skills and low perceived self-efficacy hamper the implementation of such programmes [21, 28-31]. In  
32  
33 our study motivational interviewing workshops equipped stakeholders in Site A with increased skills and  
34  
35 confidence in working with families on weight management issues. Motivational interviewing is a goal-  
36  
37 orientated, patient-centred approach based on the use of communication skills to understand individuals'  
38  
39 motivation for behaviour change [32] and has been found to be useful when applied in health care settings  
40  
41 [33]. We therefore consider it important that healthcare professionals involved in the implementation of  
42  
43 obesity programmes receive this training prior to programme commencement.

44  
45 The multidisciplinary structure of the programme emerged as both a barrier to and facilitator of  
46  
47 implementation and spread across many of the levels outlined by Grol and Wensing. While acknowledged that  
48  
49 it was required to treat such a complex health issue, it resulted in lack of role clarity, a lack of understanding of  
50  
51 specific discipline roles, and led to difficulties in scheduling. This may in part be due to the structure and  
52  
53 governance of community health services within Ireland. While there is a vision for multidisciplinary working  
54  
55 set out in multiple policy documents and an emphasis on integrated care [34], the system is not set-up to  
56  
57 support the concept. Stakeholders believe a simple roundtable introduction whereby practitioners could share  
58  
59



1  
2  
3 their professional background and outline their specific role within the project would have helped overcome  
4 this ambiguity. They suggest it is a simple but often overlooked detail. Furthermore, stakeholders feel the  
5 establishment of a local lead was critical in assisting multidisciplinary working while also facilitating discussion  
6 between national and local level. Laws et al. also highlight the importance of having key local individuals  
7 responsible for driving and coordinating research translation [35].  
8  
9  
10  
11  
12

### 13 14 15 16 **Limitations**

17  
18 Some limitations must be acknowledged; social desirability bias is a risk when stakeholders are known to the  
19 researcher conducting the interviews. In this case the stakeholders knew the researcher as the programme  
20 evaluator. However, we do not believe this to be the case as stakeholders were keen to “tell their story”.  
21  
22 Furthermore, according to de Casterlé *et al.*, (2012) “using a preconceived framework runs the risk of  
23 prematurely excluding alternative ways of organising the data”[35]pg.362. However, data was analysed  
24 inductively first before mapping onto the Grol and Wensing Framework. In subsequent phases of analysis we  
25 adapted the framework to capture the influence of the external environment on implementation.  
26  
27  
28  
29  
30  
31  
32

### 33 **CONCLUSION**

34  
35 This study highlights the complexities associated with implementing multi-component childhood weight  
36 management programmes in the community setting from a wide range of stakeholder perspectives. Our  
37 results suggest the assignment of clear roles and responsibilities, the provision of sufficient practical training  
38 and resources, and organisational support play pivotal roles in overcoming barriers to change. Furthermore,  
39 our findings on the challenges of multidisciplinary working and translating hospital programmes to community  
40 settings are applicable to the implementation of interventions beyond that of childhood weight management.  
41  
42 This evidence should be used to develop implementation plans to improve the translation of interventions into  
43 real world settings.  
44  
45  
46  
47  
48  
49  
50

### 51 **STATEMENTS:**

- 52  
53  
54  
55 • Authors' contributions  
56  
57  
58  
59  
60

1  
2  
3 The authors responsibilities were as follows: EK: was responsible for the design and conduct of the research,  
4 and writing of the manuscript. SMH: was involved in data analysis and reviewed drafts of the manuscript. EK,  
5 SMH, JH, FS and IJP made critical revisions to the paper and gave final approval of the version to be submitted.  
6  
7

8  
9  
10 • Acknowledgements

11  
12 We are grateful to the stakeholders who agreed to be interviewed for the study, without them this research  
13 would not have been possible.  
14

15  
16  
17  
18  
19 • Competing interests

20  
21 The authors declare that they have no competing interests  
22

23  
24 • Funding

25  
26 Source of support: E Kelleher is funded by the Health Research Board SPHeRE/2013/1. The Health Research  
27 Board (HRB) supports excellent research that improves people's health, patient care and health service  
28 delivery. We aim to ensure that new knowledge is created and then used in policy and practice. In doing so, we  
29 support health system innovation and create new enterprise opportunities. Dr Sheena McHugh is funded by  
30 the Centre for Ageing Research and Development in Ireland (CARDI), now the Ageing Research and  
31 Development Division within the Institute of Public Health in Ireland (IPH).  
32  
33  
34  
35  
36  
37

38  
39 • Data Sharing

40  
41 Topic guides which were used in the interviews are available as additional supporting files. However, signed  
42 confidentiality agreements prevent us from sharing transcripts.  
43  
44

45  
46 • Ethics approval

47  
48 Ethical Approval was granted by the Clinical Research Ethics Committee of the Cork Teaching Hospitals.  
49

50  
51 References

- 52  
53  
54 1. Ritchie, J. and J. Lewis, Qualitative research practice: a guide for social science students &  
55 researchers. 2003, Thousand Oaks: Sage Publications.  
56 2. Grol, R. and M. Wensing, What drives change? Barriers to and incentives for achieving  
57 evidence-based practice. Med J Aust, 2004. **180**(6 Suppl): p. S57-60.  
58  
59  
60

3. Dierckx de Casterle, B., C. Gastmans, E. Bryon, et al., QUAGOL: a guide for qualitative data analysis. *Int J Nurs Stud*, 2012. **49**(3): p. 360-71.
4. Flynn, M., D. McNeil, B. Maloff, et al., Reducing obesity and related chronic disease risk in children and youth: a synthesis of evidence with 'best practice' recommendations. *Obes Rev*, 2006. **7 Suppl 1**: p. 7-66.
5. Oude Luttikhuis, H., L. Baur, H. Jansen, et al., Interventions for treating obesity in children. *Cochrane Database Syst Rev*, 2009(1): p. Cd001872.
6. Wilfley, D., A. Staiano, M. Altman, et al., Improving access and systems of care for evidence-based childhood obesity treatment: Conference key findings and next steps. *Obesity (Silver Spring)*, 2016.
7. National Institute for Health and Clinical Excellence (NICE). Obesity. Guidance on the prevention of overweight and obesity in adults and children. Clinical Guideline, 43. NICE: London.
8. World Health Organisation., Report of the Commission on Ending Childhood Obesity. 2016, WHO Document Production Services: Geneva, Switzerland.
9. Nutbeam, D. and A. Bauman, Evaluation in a Nutshell: a practical guide to the evaluation of health promotion programs. Vol. 2. 2013, Australia: McGraw-Hill Education.
10. Welsby, D., B. Nguyen, B. O'Hara, et al., Process evaluation of an up-scaled community based child obesity treatment program: NSW Go4Fun(R). *BMC Public Health*, 2014. **14**: p. 140.
11. Lucas, P., K. Curtis-Tyler, L. Arai, et al., What works in practice: user and provider perspectives on the acceptability, affordability, implementation, and impact of a family-based intervention for child overweight and obesity delivered at scale. *BMC Public Health*, 2014. **14**: p. 614.
12. Stamatakis, K., C. Vinson, and J. Kerner, Dissemination and Implementation Research in Community and Public Health Settings, in *Dissemination and Implementation Research in Health: Translating Science to Practice*, R. Brownson, G. Colditz, and E. Proctor, Editors. 2012, Oxford University Press: New York.
13. Skelton, J. and B. Beech, Attrition in paediatric weight management: a review of the literature and new directions. *Obes Rev*, 2011. **12**(5): p. e273-81.
14. Kelleher, E., M. Davoren, J. Harrington, et al., Barriers and facilitators to initial and continued attendance at community-based lifestyle programmes among families of overweight and obese children: a systematic review. *Obes Rev*, 2016.
15. Keane, E., P. Kearney, I. Perry, et al., Trends and prevalence of overweight and obesity in primary school aged children in the Republic of Ireland from 2002-2012: a systematic review. *BMC Public Health*, 2014. **14**(1): p. 974.
16. Layte, R. and C. McCrory, Growing Up in Ireland. Overweight and Obesity among 9-year olds. 2011, Department of Children and Youth Affairs: Dublin.
17. O'Malley, G., A. Brinkley, K. Moroney, et al., Is the Temple Street W82GO Healthy Lifestyles Programme effective in reducing BMI SDS? . *Obes Facts*, 2012. **5**(Suppl. 1): p. 178-234
18. Francis, J., M. Johnston, C. Robertson, et al., What is an adequate sample size? Operationalising data saturation for theory-based interview studies. *Psychol Health*, 2010. **25**(10): p. 1229-45.
19. Bleich, S., J. Segal, Y. Wu, et al., Systematic review of community-based childhood obesity prevention studies. *Pediatrics*, 2013. **132**(1): p. e201-10.
20. Rogers, E., *Diffusion of Innovations*. 3rd ed. 1983, New York: The Free Press.
21. Gerards, S.M., P. Dagnelie, M. Jansen, et al., Barriers to successful recruitment of parents of overweight children for an obesity prevention intervention: a qualitative study among youth health care professionals. *BMC Fam Pract*, 2012. **13**: p. 37.
22. Grow, H., C. Hsu, L. Liu, et al., Understanding family motivations and barriers to participation in community-based programs for overweight youth: one program model does not fit all. *J Public Health Manag Pract*, 2013. **19**(4): p. E1-e10.

- 1
  - 2
  - 3
  - 4
  - 5
  - 6
  - 7
  - 8
  - 9
  - 10
  - 11
  - 12
  - 13
  - 14
  - 15
  - 16
  - 17
  - 18
  - 19
  - 20
  - 21
  - 22
  - 23
  - 24
  - 25
  - 26
  - 27
  - 28
  - 29
  - 30
  - 31
  - 32
  - 33
  - 34
  - 35
  - 36
  - 37
  - 38
  - 39
  - 40
  - 41
  - 42
  - 43
  - 44
  - 45
  - 46
  - 47
  - 48
  - 49
  - 50
  - 51
  - 52
  - 53
  - 54
  - 55
  - 56
  - 57
  - 58
  - 59
  - 60
23. Visram, S., T.D. Hall, and L. Geddes, Getting the balance right: qualitative evaluation of a holistic weight management intervention to address childhood obesity. *J Public Health (Oxf)*, 2012.
24. Newson, L., R. Povey, A. Casson, et al., The experiences and understandings of obesity: families' decisions to attend a childhood obesity intervention. *Psychol Health*, 2013. **28**(11): p. 1287-305.
25. Shiely, F., N. Hon Yan, E. Berkery, et al., The association between weight perception and BMI: Report and measurement data from the growing up in Ireland cohort study of 9 year olds. *Int J Obes*, 2016.
26. Binkin, N., A. Spinelli, G. Baglio, et al., What is common becomes normal: the effect of obesity prevalence on maternal perception. *Nutr Metab Cardiovasc Dis*, 2013. **23**(5): p. 410-6.
27. Barry, C., M. Jarlenski, R. Grob, et al., News Media Framing of Childhood Obesity in the United States From 2000 to 2009. *Pediatrics*, 2011.
28. Moyers, P., L. Bugle, and E. Jackson, Perceptions of school nurses regarding obesity in school-age children. *J Sch Nurs*, 2005. **21**(2): p. 86-93.
29. Steele, R., Y. Wu, C. Jensen, et al., School nurses' perceived barriers to discussing weight with children and their families: a qualitative approach. *J Sch Health*, 2011. **81**(3): p. 128-37.
30. Story, M., D. Neumark-Stzainer, N. Sherwood, et al., Management of child and adolescent obesity: attitudes, barriers, skills, and training needs among health care professionals. *Pediatrics*, 2002. **110**(1 Pt 2): p. 210-4.
31. Turner, K., J. Shield, and C. Salisbury, Practitioners' views on managing childhood obesity in primary care: a qualitative study. *The British J of Gen Pract*, 2009. **59**(568): p. 856-862.
32. Miller, W. and S. Rollnick, *Motivational Interviewing: Preparing people for change*. 2002, New York: The Guilford Press.
33. Lozano, P., H. McPhillips, B. Hartzler, et al., Randomized trial of teaching brief motivational interviewing to pediatric trainees to promote healthy behaviors in families. *Arch Pediatr Adolesc Med*, 2010. **164**(6): p. 561-6.
34. Department of Health., *A Healthy Weight for Ireland 2016–2025*. Obesity Policy and Action Plan 2016, Stationary Office: Dublin.
35. Laws, R., K. Hesketh, K. Ball, et al., Translating an early childhood obesity prevention program for local community implementation: a case study of the Melbourne InFANT Program. *BMC Public Health*, 2016. **16**: p. 748.

Table 3 Perceived Barriers and Facilitators to the Implementation of W82GO in the Community

| Levels                                                                 | Quotations to illustrate the identified levels                                                                                                                                                                                                                                                                                                                                                                                                                                                                                                                                                                                                                                                                                                                                                                                                                                                                                                                                                                                                                                                     |
|------------------------------------------------------------------------|----------------------------------------------------------------------------------------------------------------------------------------------------------------------------------------------------------------------------------------------------------------------------------------------------------------------------------------------------------------------------------------------------------------------------------------------------------------------------------------------------------------------------------------------------------------------------------------------------------------------------------------------------------------------------------------------------------------------------------------------------------------------------------------------------------------------------------------------------------------------------------------------------------------------------------------------------------------------------------------------------------------------------------------------------------------------------------------------------|
| <b>The Innovation</b>                                                  |                                                                                                                                                                                                                                                                                                                                                                                                                                                                                                                                                                                                                                                                                                                                                                                                                                                                                                                                                                                                                                                                                                    |
| Credibility                                                            | (+) <i>"I suppose because it was attached to an acute hospital and because there was a consultant paediatrician and you had a lot of disciplines and a lot of very competent professionals involved, and that it had been successful when delivered there. That was the main reason I believed in the programme I suppose", W82GO003</i>                                                                                                                                                                                                                                                                                                                                                                                                                                                                                                                                                                                                                                                                                                                                                           |
| Attractiveness (i.e. Multidisciplinary nature)                         | (+) <i>"I do think the MDT approach was superb. I think that is you're going to do something for a child who is obese then you need it."</i>                                                                                                                                                                                                                                                                                                                                                                                                                                                                                                                                                                                                                                                                                                                                                                                                                                                                                                                                                       |
| Transferability (i.e. different population, different resource issues) | (-) <i>"You are talking about a different cohort of families. Families who are already in the system. They are used to going in for appointments. You're talking about a group who've already had difficulties identified by their GP or whoever so by the time they are going for the group they are already sold, they are used to it and they are used to that sort of setting which is very kind of fast and quick-paced and very focused", W82GO002</i>                                                                                                                                                                                                                                                                                                                                                                                                                                                                                                                                                                                                                                       |
| Relevance (e.g. too medicalised)                                       | (-) <i>"I think the area medical officer, the medical input I think is probably optional or at least part-time. It's of less importance. It medicalised this community programme a bit too much", W82GO021</i>                                                                                                                                                                                                                                                                                                                                                                                                                                                                                                                                                                                                                                                                                                                                                                                                                                                                                     |
| <b>The Individual Professional</b>                                     |                                                                                                                                                                                                                                                                                                                                                                                                                                                                                                                                                                                                                                                                                                                                                                                                                                                                                                                                                                                                                                                                                                    |
| Awareness of the problem / Recognition of need                         | (+) <i>"It is a problem, most definitely. I think it's a time bomb that went off over the past 10 years and that we are behind it. Way behind it and the sooner we get going and get doing something the better", W82GO013</i>                                                                                                                                                                                                                                                                                                                                                                                                                                                                                                                                                                                                                                                                                                                                                                                                                                                                     |
| Personal interest and motivation                                       | (+) <i>"So that enthusiasm and that dedication made it happen, it was key to its success", W82GO011</i>                                                                                                                                                                                                                                                                                                                                                                                                                                                                                                                                                                                                                                                                                                                                                                                                                                                                                                                                                                                            |
| Low self-efficacy                                                      | (-) <i>"I wouldn't be especially skilled in assessing children you know with obesity and that kind of thing... Or talking to parents about it... I was concerned about my own ability to, to get up to speed fairly quickly", W82GO015</i>                                                                                                                                                                                                                                                                                                                                                                                                                                                                                                                                                                                                                                                                                                                                                                                                                                                         |
| Attitudes (i.e. Multidisciplinary perspectives)                        | (-) <i>"I suppose the other main challenge was the multidisciplinary nature of the programme. I think the challenges of it is when you put together a team obviously from all different backgrounds not with different agendas but with different experiences and knowledge and different perspectives", W82GO026</i>                                                                                                                                                                                                                                                                                                                                                                                                                                                                                                                                                                                                                                                                                                                                                                              |
| <b>The Patient</b>                                                     |                                                                                                                                                                                                                                                                                                                                                                                                                                                                                                                                                                                                                                                                                                                                                                                                                                                                                                                                                                                                                                                                                                    |
| Parental Resistance (weight misperception and denial)                  | (-) <i>"I think there was a denial that there was anything wrong with their child, or that their child was overweight. There was a total denial about that because the population in general look like their child. Their child may be a little bit above of what the normal population looks like, but they didn't see that as an issue at all.", W82GO028</i><br><br>(-) <i>"Like there was still a reluctance on the part of the parents to accept that their child was obese and that certainly was an issue. So even at this stage they would have had discussions with the public health nurse and the area medical officer and then I would have seen them and they still didn't believe that their child was obese", W82GO004</i><br><br>(-) <i>"Other parents then just flat out denied that their child was overweight and accused me a being wrong and that they didn't believe me. They often actually compared their children to others you know saying he's not as big as some other fella down the road and i really should be going to have a chat with that mother", W82GO008</i> |
| <b>The Social Context</b>                                              |                                                                                                                                                                                                                                                                                                                                                                                                                                                                                                                                                                                                                                                                                                                                                                                                                                                                                                                                                                                                                                                                                                    |
| Supportive colleagues                                                  | (+) <i>Presence of supportive colleagues "once she came on board there was two of us, it was a lot easier to share the workload and if i couldn't be there for a day she could be there for it so I</i>                                                                                                                                                                                                                                                                                                                                                                                                                                                                                                                                                                                                                                                                                                                                                                                                                                                                                            |

|                                                |                                                                                                                                                                                                                                                                                                                                                                                                                                                                                                                                                                                                                                                                                                                                                                                                                              |
|------------------------------------------------|------------------------------------------------------------------------------------------------------------------------------------------------------------------------------------------------------------------------------------------------------------------------------------------------------------------------------------------------------------------------------------------------------------------------------------------------------------------------------------------------------------------------------------------------------------------------------------------------------------------------------------------------------------------------------------------------------------------------------------------------------------------------------------------------------------------------------|
| Leadership                                     | <p><i>suppose that definitely took the load off and she also acted as a sounding board you know? If there was something I wasn't sure of I could say what do you think about this and vice-versa. you know what I mean?", W82GO016</i></p> <p><i>(+) "I mean if we didn't have her pulling all those people and bits together it wouldn't have worked. She did a great job in i think the co-ordination role cause i think running something like this with people dispersed across a whole county and city then you need a project manager on the ground.", W82GO017</i></p>                                                                                                                                                                                                                                                |
| Collaboration between national and local teams | <p><i>(-) "There was a feeling at a national level that this was just going to be rolled out like 3 a week kind of thing and that everyone would take up on it", W82GO009</i></p>                                                                                                                                                                                                                                                                                                                                                                                                                                                                                                                                                                                                                                            |
| <b>The Organisational Context</b>              |                                                                                                                                                                                                                                                                                                                                                                                                                                                                                                                                                                                                                                                                                                                                                                                                                              |
| MDT Structure (logistics)                      | <p><i>(-) "I suppose one of the challenges definitely is that the health professionals are all in different places", W82GO004</i></p>                                                                                                                                                                                                                                                                                                                                                                                                                                                                                                                                                                                                                                                                                        |
| Resources                                      | <p><i>(-) "I guess time constraints 'cause a lot of people were pressurised for time. Like even ourselves we wouldn't have been able to go to every session and I would have liked to have gone but we just couldn't. We didn't have the time. We didn't have the staff to be able to attend so i think time and resource pressures were the main concerns", W82GO013</i></p>                                                                                                                                                                                                                                                                                                                                                                                                                                                |
| Training                                       | <p><i>(-) "It (the training) was as if they were trying to sell us the programme when you know we were already there. We were already sold. I mean we knew why it was important... because of the obesity issue so there was no need to go over all that again. They should have just focused on how to actually implement and deliver the programme", W82GO011</i></p>                                                                                                                                                                                                                                                                                                                                                                                                                                                      |
| <b>External Environment</b>                    |                                                                                                                                                                                                                                                                                                                                                                                                                                                                                                                                                                                                                                                                                                                                                                                                                              |
| Lack of existing services                      | <p><i>(+) "There is nothing out there so that's where it was great to have something like W82GO. That if you did see a child that you know there was something. Some sort of pathway"</i></p>                                                                                                                                                                                                                                                                                                                                                                                                                                                                                                                                                                                                                                |
| Media                                          | <p><i>(+) "There was a huge media campaign ongoing around the time we were implementing the programme which got some parents thinking and talking. I mean those things do have a big impact. Things like Operation Transformation that's aired in January have a huge impact. I think we need more media on the impact of childhood obesity and not just the long-term impacts", W82GO003</i></p> <p><i>(-) "I think maybe it's (obesity) hyped up a little bit in the media. I think maybe that in itself could be making things difficult for parents to come forward. We don't have any other disease related issue hyped up as much you know? If you had a child with obesity you would be feeling a small bit cringe like. You'd be wanting to find somewhere private to get some help like you know", W82GO020</i></p> |
| Stigma                                         | <p><i>(-) "Wouldn't have their child come to a programme in case they'd be labelled overweight or obese. There is a stigma and just from hearing again I wasn't in the parents room, but just from hearing other colleagues feedback it's the parents fear of feeling judged and blamed", W82GO002</i></p>                                                                                                                                                                                                                                                                                                                                                                                                                                                                                                                   |

(+) Facilitators, (-) Barriers.

## COREQ Checklist for Qualitative Research:

| No. Item                                       | Guide questions/description                                                                                                                              | Reported on Page # |
|------------------------------------------------|----------------------------------------------------------------------------------------------------------------------------------------------------------|--------------------|
| <b>Domain 1: Research team and reflexivity</b> |                                                                                                                                                          |                    |
| <i>Personal Characteristics</i>                |                                                                                                                                                          |                    |
| 1. Interviewer/facilitator                     | Which author/s conducted the interview or focus group?                                                                                                   | Pg. 6              |
| 2. Credentials                                 | What were the researcher's credentials? E.g. PhD, MD                                                                                                     | Pg. 1              |
| 3. Occupation                                  | What was their occupation at the time of the study?                                                                                                      | Pg. 1              |
| 4. Gender                                      | Was the researcher male or female?                                                                                                                       | Pg. 1              |
| 5. Experience and training                     | What experience or training did the researcher have?                                                                                                     | Pg. 6              |
| <i>Relationship with participants</i>          |                                                                                                                                                          |                    |
| 6. Relationship established                    | Was a relationship established prior to study commencement?                                                                                              | Pg. 3              |
| 7. Participant knowledge of the interviewer    | What did the participants know about the researcher? e.g. personal goals, reasons for doing the research                                                 | Pg. 15             |
| 8. Interviewer characteristics                 | What characteristics were reported about the interviewer/facilitator? e.g. Bias, assumptions, reasons and interests in the research topic                | Pg. 1              |
| <b>Domain 2: study design</b>                  |                                                                                                                                                          |                    |
| <i>Theoretical framework</i>                   |                                                                                                                                                          |                    |
| 9. Methodological orientation and Theory       | What methodological orientation was stated to underpin the study? e.g. grounded theory, discourse analysis, ethnography, phenomenology, content analysis | Pg. 6-7            |
| <i>Participant selection</i>                   |                                                                                                                                                          |                    |
| 10. Sampling                                   | How were participants selected? e.g. purposive, convenience, consecutive, snowball                                                                       | Pg. 6              |
| 11. Method of approach                         | How were participants approached? e.g. face-to-face, telephone, mail, email                                                                              | Pg. 6              |
| 12. Sample size                                | How many participants were in the study?                                                                                                                 | Pg. 7              |
| 13. Non-participation                          | How many people refused to participate or dropped out? Reasons?                                                                                          | Pg. 7              |
| <i>Setting</i>                                 |                                                                                                                                                          |                    |
| 14. Setting of data collection                 | Where was the data collected? e.g. home, clinic, workplace                                                                                               | Pg. 6              |
| 15. Presence of non-participants               | Was anyone else present besides the participants and researchers?                                                                                        | NA                 |
| 16. Description of sample                      | What are the important characteristics of the sample? e.g. demographic data, date                                                                        | Pg. 7              |
| <i>Data collection</i>                         |                                                                                                                                                          |                    |

|                                        |                                                                                                                                 |                                                  |
|----------------------------------------|---------------------------------------------------------------------------------------------------------------------------------|--------------------------------------------------|
| 17. Interview guide                    | Were questions, prompts, guides provided by the authors? Was it pilot tested?                                                   | Pg. 6                                            |
| 18. Repeat interviews                  | Were repeat interviews carried out? If yes, how many?                                                                           | NA                                               |
| 19. Audio/visual recording             | Did the research use audio or visual recording to collect the data?                                                             | Pg. 6                                            |
| 20. Field notes                        | Were field notes made during and/or after the interview or focus group?                                                         | Yes                                              |
| 21. Duration                           | What was the duration of the interviews or focus group?                                                                         | Pg. 6                                            |
| 22. Data saturation                    | Was data saturation discussed?                                                                                                  | Pg. 6                                            |
| 23. Transcripts returned               | Were transcripts returned to participants for comment and/or correction?                                                        | No                                               |
| <b>Domain 3: analysis and findings</b> |                                                                                                                                 |                                                  |
| <i>Data analysis</i>                   |                                                                                                                                 |                                                  |
| 24. Number of data coders              | How many data coders coded the data?                                                                                            | Pg. 7                                            |
| 25. Description of the coding tree     | Did authors provide a description of the coding tree?                                                                           | N/A                                              |
| 26. Derivation of themes               | Were themes identified in advance or derived from the data?                                                                     | Pg. 7                                            |
| 27. Software                           | What software, if applicable, was used to manage the data?                                                                      | Pg. 7                                            |
| 28. Participant checking               | Did participants provide feedback on the findings?                                                                              | NA                                               |
| <i>Reporting</i>                       |                                                                                                                                 |                                                  |
| 29. Quotations presented               | Were participant quotations presented to illustrate the themes/findings? Was each quotation identified? e.g. participant number | Pg. 8-13                                         |
| 30. Data and findings consistent       | Was there consistency between the data presented and the findings?                                                              | Pg. 8-13                                         |
| 31. Clarity of major themes            | Were major themes clearly presented in the findings?                                                                            | Pg. 8-13                                         |
| 32. Clarity of minor themes            | Is there a description of diverse cases or discussion of minor themes?                                                          | Discussion of major and minor themes<br>Pg. 8-13 |



# BMJ Open

**Barriers and facilitators to the implementation of a community-based, multidisciplinary, family-focused childhood weight management programme: A qualitative study.**

|                                 |                                                                                                                                                                                                                                                                                                                                                                          |
|---------------------------------|--------------------------------------------------------------------------------------------------------------------------------------------------------------------------------------------------------------------------------------------------------------------------------------------------------------------------------------------------------------------------|
| Journal:                        | <i>BMJ Open</i>                                                                                                                                                                                                                                                                                                                                                          |
| Manuscript ID                   | bmjopen-2017-016459.R1                                                                                                                                                                                                                                                                                                                                                   |
| Article Type:                   | Research                                                                                                                                                                                                                                                                                                                                                                 |
| Date Submitted by the Author:   | 24-Apr-2017                                                                                                                                                                                                                                                                                                                                                              |
| Complete List of Authors:       | Kelleher, Emily; University College Cork, Epidemiology and Public Health Harrington, Janas; University College Cork, Epidemiology and Public Health Shiely, Frances; University College Cork, Epidemiology and Public Health Perry, Ivan; University College Cork, Epidemiology and Public Health Mc Hugh, Sheena; University College Cork, Epidemiology & Public Health |
| <b>Primary Subject Heading</b>: | Paediatrics                                                                                                                                                                                                                                                                                                                                                              |
| Secondary Subject Heading:      | Qualitative research, Health services research, Public health                                                                                                                                                                                                                                                                                                            |
| Keywords:                       | Implementation, barriers, facilitators, childhood, obesity, community                                                                                                                                                                                                                                                                                                    |
|                                 |                                                                                                                                                                                                                                                                                                                                                                          |

SCHOLARONE™  
Manuscripts

1  
2  
3 Title:  
4

5 Barriers and facilitators to the implementation of a community-based, multidisciplinary, family-focused  
6  
7 childhood weight management programme: A qualitative study  
8

9  
10 Corresponding Author:  
11

12 Emily Kelleher, MPH BSc, Department of Epidemiology and Public Health, 4<sup>th</sup> Floor, Western Gateway Building,  
13 University College Cork, Ireland. Email: [emily.kelleher@ucc.ie](mailto:emily.kelleher@ucc.ie) Tel: 00353 (21) 4205517  
14  
15

16  
17 Authors:  
18

19 Emily Kelleher, Department of Epidemiology and Public Health, University College Cork, Ireland  
20

21  
22 Janas M Harrington, Department of Epidemiology and Public Health, University College Cork, Ireland  
23

24  
25 Frances Shiely, Department of Epidemiology and Public Health, University College Cork and HRB Clinical  
26 Research Facility, Mercy University Hospital, Grenville Place, Cork, Ireland  
27

28  
29 Ivan J Perry, Department of Epidemiology and Public Health, University College Cork, Ireland  
30

31  
32 Sheena M McHugh, Department of Epidemiology and Public Health, University College Cork, Ireland  
33  
34

35 Word Count:  
36

37 4159  
38  
39

40 Keywords:  
41

42 Implementation; barriers; facilitators; childhood; obesity; community; treatment  
43  
44  
45  
46  
47  
48  
49  
50  
51  
52  
53  
54  
55  
56  
57  
58  
59  
60

**ABSTRACT:**

**Objective:** To explore the barriers and facilitators experienced by those implementing a government-funded, community-based, childhood weight management programme.

**Design:** Qualitative using semi-structured interviews.

**Setting:** Two geographical regions in the south and west of the Republic of Ireland.

**Participants:** 29 national and local level stakeholders responsible for implementing the programme including professionals from dietetics, psychology, public health nursing, physiotherapy, health promotion and administration.

**Methods:** Framework analysis was used to identify barriers and facilitators which were mapped onto six levels of factors influencing implementation outlined by Grol and Wensing: the innovation, the individual professional, the patient, the social context, the organisational context, and the external environment.

**Results:** Most barriers occurred at the level of the organisational context. For all stakeholders, barriers arose due to the multidisciplinary nature of the programme, including the lack of role clarity and added complexity of working in different locations. Health professionals' low-perceived self-efficacy in approaching the subject of weight with parents and parental resistance to hearing about their child's weight status were barriers to programme implementation at the individual professional and patient levels, respectively. The main facilitators of implementation, occurring at the level of the health professional, included stakeholders' recognition of the need for a weight management programme and personal interest in the area of childhood obesity. Having a local lead and supportive colleagues were further implementation drivers.

**Conclusions:** This study highlights the complexities associated with implementing a multidisciplinary childhood weight management programme, particularly translating such programmes to a community setting. Our results suggest the assignment of clear roles and responsibilities, the provision of sufficient practical training and resources, and organisational support play pivotal roles in overcoming barriers to change. This evidence can be used to develop an implementation plan to support the translation of interventions into real world settings.

**KEYWORDS:**

Implementation; barriers; facilitators; childhood; obesity; community

**ARTICLE SUMMARY****Strengths and limitations**

- This is one of few qualitative studies, and the first in Ireland, that explored the factors that hampered and facilitated the implementation of a community-based, multi-component childhood weight management programme from a wide range of stakeholder perspectives.
- While interviewing a wide range of stakeholders provided a thorough overview of the relevant issues, the themes that emerged were relatively homogenous across disciplines which added to the authority of the findings.
- Data were analysed using a systematic approach and an adapted version of the implementation model by Grol and Wensing was used to classify the barriers and facilitators into levels.
- Using a preconceived framework runs the risk of prematurely excluding other ways of organising the data. However, data was analysed inductively first before mapping onto the Grol and Wensing Framework.

**BACKGROUND:**

Childhood obesity is a worldwide public health concern and there is now widespread agreement that the complex aetiology of the issue requires a multifaceted approach to treatment [1-3]. International recommendations agree that initiatives to reduce and manage childhood obesity should be family-focused and combine healthy eating, physical activity and behavioural components [2, 4, 5]. In 2016, the World Health Organisation published their report of the commission on ending childhood obesity within which they echo these recommendations but also add that they should be delivered by “*multi-professional teams with appropriate training and resources*” [5]pg.11. These recommendations, however, have been largely based on small-scale studies conducted in controlled settings with specialised staff, thus limiting their applicability and generalizability to ‘real-world’ settings such as communities or hospitals [2].

1  
2  
3 In public health, once interventions have undergone innovation testing and demonstrated efficacy the next  
4 steps include replication and 'scale-up' to larger populations in 'real-world' settings [6]. There are relatively  
5 few examples of published studies reporting on the pragmatic application of effective childhood obesity  
6 treatment programmes [7, 8]. While implementation issues such as engagement, local context, staffing and  
7 funding are likely to be common across many public health interventions [8], little is documented about the  
8 experience of those implementing childhood weight management programmes and even fewer studies detail  
9 the factors influencing implementation [9]. For example, a lack of providers trained in evidence-based care for  
10 childhood obesity was listed by delegates attending a recent conference in the United States as a major barrier  
11 to treatment implementation [3]. Furthermore, with the majority of families declining referral and up to 75%  
12 of families discontinuing care, poor engagement with families has proven to be a significant challenge facing  
13 teams tasked with implementing such programmes [10, 11].

14  
15  
16  
17  
18  
19  
20  
21  
22  
23  
24  
25 When introduced under less-controlled conditions, insight into the factors influencing implementation is  
26 crucial. Therefore, the aim of this study was to explore and categorise the barriers and facilitators experienced  
27 by those implementing a government-funded, community-based, multi-component childhood weight  
28 management pilot programme to inform their eventual scale up.

## 29 30 31 32 33 **METHODS:**

### 34 35 36 **Intervention and context**

37  
38  
39 Although trends appear to be stabilising in Ireland, prevalence of childhood obesity remains high [12].  
40 Currently, in Ireland, almost one in four children are either overweight or obese [13] and there is no  
41 standardised community-based weight management programme available to those children with obesity.  
42 Community programmes are usually provided on an ad-hoc basis and are rarely evaluated or sustained. In an  
43 attempt to identify a universal treatment the Irish Health Service Executive (HSE) planned to pilot the *W82GO-*  
44 *community* programme in two communities. This programme had previously demonstrated effectiveness in  
45 the hospital setting [14]. Its effectiveness in the community setting was to be assessed with the intention of  
46 nationwide rollout should the programme demonstrate a positive impact on body mass index (BMI). The  
47 Template for Intervention Description and Replication (TIDieR) checklist [15] was used to specify the details of  
48 programme delivery and is included in Supplementary file 1.

1  
2  
3 In summary, *W82GO* aims to improve nutrition, increase physical activity and facilitate behaviour change over  
4 one year [14]. It was designed as a hospital-based, family-focused, multidisciplinary programme grounded in  
5 behavioural change theory and was modelled on best practice recommendations [2, 5, 16]. The primary goal  
6 was a reduction in Body Mass Index Standard Deviation Score and has previously been found to be effective  
7 when delivered in a hospital out-patient setting [14].  
8  
9

10  
11  
12  
13 The *W82GO* programme involves an initial individual assessment to ascertain family eligibility followed by two  
14 phases. Families were eligible for the programme if the child was between 5-7 years old; was obese (BMI  
15  $\geq 98$ th centile); had no limitations to engaging in physical activity; was not taking medication known to affect  
16 body weight; and had at least one parent/carer who was able to attend each of the programme sessions.  
17 Siblings were also welcome to attend the sessions. Phase 1 involved an initial intensive phase consisting of six  
18 weekly group sessions for both the child and his/her parent/carer. These sessions lasted approximately one  
19 and a half to two hours and incorporated educational and practical sessions to increase physical activity,  
20 improve nutrition and increase sleep. Upon completion of phase 1, children returned with their parents/care-  
21 givers for three booster group sessions at three, six and nine months. These sessions aimed to encourage the  
22 family to continue with lifestyle change and to manage any barriers to change. Finally, at 12 months, the  
23 children and their parents/care-givers returned for a final individual assessment to document any changes and  
24 make plans for sustainment.  
25  
26  
27  
28  
29  
30  
31  
32  
33  
34  
35  
36

37 For the current study, *W82GO* was adapted and implemented in two community sites (Site A and Site B) from  
38 April 2015 for 12 months and subsequently renamed *W82GO-community*. Both sites were chosen as they were  
39 part of a national pilot growth measurement programme and included a mix of rural and urban towns in the  
40 west and south of Ireland. Initial assessments took place in community healthcare offices while subsequent  
41 group sessions were delivered on weekdays in the afternoon at a local sports or community centre. The  
42 programme was offered free of charge and was delivered by existing community health professionals including  
43 dietitians, psychologists, public health nurses, physiotherapists, health promotion officers, area medical  
44 officers and administrators. These health professionals were brought together as a team and asked to deliver  
45 this programme as part of their existing roles. Table 1 outlines their specific responsibilities during programme  
46 implementation. All staff were invited to take part in a training programme prior to programme  
47 commencement Training included a needs assessment, a one day educational training course and two days of  
48  
49  
50  
51  
52  
53  
54  
55  
56  
57  
58  
59  
60

clinical shadowing with an experienced W82GO programme practitioner at the National Children's University Hospital where it was developed. Each community practitioner was supplied with a user manual which outlined the programme and detailed the content for both phases.

**Table 1 Health professional roles during the implementation of W82GO-community**

| Community Health Professional | Role in implementation of W82GO-community                                                                                        |
|-------------------------------|----------------------------------------------------------------------------------------------------------------------------------|
| National Manager              | Overseeing implementation of W82GO-community in both community sites                                                             |
| Local Manager                 | Overseeing implementation of W82GO-community at local level. Local manager in Site B was involved in referring to the programme. |
| Physiotherapists              | Involved in initial assessments and delivering programme material                                                                |
| Dietitians                    | Involved in initial assessments and delivering programme material                                                                |
| Psychologists                 | Involved in initial assessments and delivering programme material                                                                |
| Public Health Nurses          | Referral to the programme                                                                                                        |
| Area Medical Officers         | Involved in initial assessments                                                                                                  |
| Health Promotion Officers     | Delivering programme material                                                                                                    |
| Administration                | Involved in contacting parents re programme sessions                                                                             |

### Study design and sample

A qualitative approach using semi-structured interviews was utilised. We adopted a purposive approach to sampling, inviting stakeholders with knowledge and experience of planning, coordinating or delivering of W82GO-community. Stakeholders included professionals from dietetics (n=5), clinical psychology (n=3), public health nursing (n=13), physiotherapy (n=4), health promotion (n=4), medicine (n=4), administration (n=2) as well as individuals from both national and local-level management (n=3). To ensure representation from each stakeholder group and given the small number of individuals in each, we invited all stakeholders to participate. All stakeholders were contacted by email in the first instance and followed up by telephone contact during which the researcher outlined the study aims and methodology.

### Data collection

All participants were invited to take part in face-to-face interviews. However, due to time and scheduling difficulties a mixture of telephone (n=22) and face-to-face (n=7) interviews were conducted between August 2015 and February 2016 (during programme implementation). To ensure consistency all interviews were conducted by a single trained qualitative researcher (EK), using a semi structured topic guide. Participants

1  
2  
3 knew the interviewer as an independent programme evaluator conducting this research as part of her PhD  
4 training. The topic guide was developed based on relevant literature and focused on seven issues: (1)  
5 awareness of the issue of childhood obesity and existing healthy lifestyle programmes, (2) perceived value of  
6 and interest in community evidence-based treatment programmes, (3) communication of the *W82GO-*  
7 *community* pilot programme; (4) specific role in implementing *W82GO-community*; (5) barriers and enablers to  
8 implementation; (6) perceived successes and challenges experienced and finally (7) recommendations for the  
9 future roll-out of childhood weight management programmes in Irish communities. Core topics were the same  
10 across stakeholders and particular probes were added for specific stakeholder groups depending on their role  
11 during programme. For example public health nurses were specifically asked to report on the barriers and  
12 facilitators to referral. Prompts and probes were used throughout the interviews to stimulate discussion. Prior  
13 to each interview, participants were informed about the purpose of the study, that participation was voluntary  
14 and that they could terminate the interview at any stage for any reason. Signed informed consent was  
15 obtained before each interview, which lasted on average 45 minutes. Interviews were digitally recorded and  
16 transcribed verbatim. Data collection and analysis was iterative. Data saturation was judged to have been  
17 reached between interviews 20 and 25. However during recruitment, other stakeholders had expressed an  
18 interest in sharing their experience and so were given the opportunity to participate. The data from these  
19 interviews overlapped with the existing coding framework and thus contributed to the main themes. Ethical  
20 approval was granted by the Clinical Research Ethics Committee of the Cork Teaching Hospitals.

### 38 **Data Analysis**

39  
40  
41 Framework analysis was used to analyse the data [17]. This approach enabled the investigation of a priori  
42 objectives while also allowing new themes to emerge from the data. One researcher (EK) transcribed and  
43 coded each transcript while another (SMH) undertook initial coding of a selection of transcripts. Similarities  
44 and differences between the coding labels and definitions were discussed and the coding framework was  
45 refined and applied to the remaining interviews. While this process was conducted at an early stage of the  
46 analysis, the coding process was iterative; emergent codes were added to the framework and contributed to  
47 the development of themes across the interviews. Codes were synthesised and grouped according to the  
48 dominant emergent themes. Themes were also analysed across stakeholder groups to identify similarities and  
49 differences across disciplines and positions. These themes were mapped onto a framework developed by Grol  
50  
51  
52  
53  
54  
55  
56  
57  
58  
59  
60



and Wensing (2004) which specifies six levels of factors that facilitate or impede implementation success: the innovation; the individual professional, the patient; the social context; the organisational context; and the economic and political environment [18]. Mapping emergent themes to the framework at this stage of the analysis ensured that we did not impose a predefined structure or terminology on participants' accounts. This well-established framework (Table 2) was chosen because it describes how barriers and facilitators can be identified, categorised, and used for the development of tailor-based implementation strategies to facilitate desired change [18], in this instance implementing the *W82GO-community* programme. Discrepancies on the mapping of themes were discussed until consensus was reached. NVivo (QSR v10) was used to manage data analysis.

**Table 2 Barriers to and incentives for change at different levels of healthcare<sup>a</sup>**

| Level                          | Barriers / Incentives                                                           |
|--------------------------------|---------------------------------------------------------------------------------|
| Innovation                     | Advantages in practice, feasibility, credibility, attractiveness, accessibility |
| Individual Practitioner        | Awareness, knowledge, attitude, motivation to change, behavioural routines      |
| Patient                        | Knowledge, skills, attitude, compliance                                         |
| Social Context                 | Opinion of colleagues, culture of the network, collaboration, leadership        |
| Organisational Context         | Organisation of care processes, staff, capacities, resources, structures        |
| Economic and Political Context | Financial arrangements, regulations, policies                                   |

<sup>a</sup>*Grol and Wensing's multilevel model[18]*

## RESULTS

### Stakeholder Characteristics

We contacted 38 stakeholders and recruited 29 interviewees from a range of disciplines and professions, yielding a response rate of 76% (Table 3).

**Table 3 Stakeholder characteristics**

|                           | Site A | Site B | National | Total |
|---------------------------|--------|--------|----------|-------|
| National Manager          | NA     | NA     | 1        | 1     |
| Local Manager             | 1      | 1      | x        | 2     |
| Physiotherapists          | 2      | 1      | 1        | 4     |
| Dietitians                | 3      | x      | x        | 3     |
| Psychologists             | 1      | 1      | x        | 2     |
| Public Health Nurses      | 6      | 3      | x        | 9     |
| Area Medical Officers     | x      | 2      | x        | 2     |
| Health Promotion Officers | 3      | 1      | x        | 4     |

|                |    |   |   |    |
|----------------|----|---|---|----|
| Administration | 1  | x | 1 | 2  |
| Total          | 17 | 9 | 3 | 29 |

### Barriers and Facilitators

For all participants, barriers arose due to the multidisciplinary nature of the programme, including the lack of understanding of other disciplines, lack of role clarity as well as the added complexities of working in different locations. Participants' recognition of the need for a childhood obesity programme and their own personal interest in the area were the main drivers of implementation while the presence of a local lead and supportive colleagues were further enabling factors. Views on the main barriers and facilitators to implementation were consistent across stakeholders; despite different disciplinary backgrounds, they had common experiences as implementers adding to the authority of the findings. Table 4 presents the perceived barriers and facilitators from the perspective of the stakeholders mapped onto the six implementation levels with quotations to illustrate each level.

**Table 4 Perceived Barriers and Facilitators to the Implementation of W82GO in the Community**

| Levels                                                                 | Quotations to illustrate the identified levels                                                                                                                                                                                                                                                                                                                                                                                                               |
|------------------------------------------------------------------------|--------------------------------------------------------------------------------------------------------------------------------------------------------------------------------------------------------------------------------------------------------------------------------------------------------------------------------------------------------------------------------------------------------------------------------------------------------------|
| <b>The Innovation</b>                                                  |                                                                                                                                                                                                                                                                                                                                                                                                                                                              |
| Credibility                                                            | (+) <i>"I suppose because it was attached to an acute hospital and because there was a consultant paediatrician and you had a lot of disciplines and a lot of very competent professionals involved, and that it had been successful when delivered there. That was the main reason I believed in the programme I suppose", W82GO003</i>                                                                                                                     |
| Attractiveness (i.e. Multidisciplinary nature)                         | (+) <i>"I do think the MDT approach was superb. I think that is you're going to do something for a child who is obese then you need it."</i>                                                                                                                                                                                                                                                                                                                 |
| Transferability (i.e. different population, different resource issues) | (-) <i>"You are talking about a different cohort of families. Families who are already in the system. They are used to going in for appointments. You're talking about a group who've already had difficulties identified by their GP or whoever so by the time they are going for the group they are already sold, they are used to it and they are used to that sort of setting which is very kind of fast and quick-paced and very focused", W82GO002</i> |
| Relevance (e.g. too medicalised)                                       | (-) <i>"I think the area medical officer, the medical input I think is probably optional or at least part-time. It's of less importance. It medicalised this community programme a bit too much", W82GO021</i>                                                                                                                                                                                                                                               |
| <b>The Individual Professional</b>                                     |                                                                                                                                                                                                                                                                                                                                                                                                                                                              |
| Awareness of the problem / Recognition of need                         | (+) <i>"It is a problem, most definitely. I think it's a time bomb that went off over the past 10 years and that we are behind it. Way behind it and the sooner we get going and get doing something the better", W82GO013</i>                                                                                                                                                                                                                               |
| Personal interest and motivation                                       | (+) <i>"So that enthusiasm and that dedication made it happen, it was key to its success", W82GO011</i>                                                                                                                                                                                                                                                                                                                                                      |
| Low self-efficacy                                                      | (-) <i>"I wouldn't be especially skilled in assessing children you know with obesity and that kind of thing... Or talking to parents about it... I was concerned about my own ability to, to get up to speed fairly quickly", W82GO015</i>                                                                                                                                                                                                                   |

|                                                       |                                                                                                                                                                                                                                                                                                                                                                                                                                                                                                                                                                                                                                                                                                                                                                                                         |
|-------------------------------------------------------|---------------------------------------------------------------------------------------------------------------------------------------------------------------------------------------------------------------------------------------------------------------------------------------------------------------------------------------------------------------------------------------------------------------------------------------------------------------------------------------------------------------------------------------------------------------------------------------------------------------------------------------------------------------------------------------------------------------------------------------------------------------------------------------------------------|
| Attitudes (i.e. Multidisciplinary perspectives)       | (-) "I suppose the other main challenge was the multidisciplinary nature of the programme. I think the challenges of it is when you put together a team obviously from all different backgrounds not with different agendas but with different experiences and knowledge and different perspectives", W82GO026                                                                                                                                                                                                                                                                                                                                                                                                                                                                                          |
| <b>The Patient</b>                                    |                                                                                                                                                                                                                                                                                                                                                                                                                                                                                                                                                                                                                                                                                                                                                                                                         |
| Parental Resistance (weight misperception and denial) | (-) "I think there was a denial that there was anything wrong with their child, or that their child was overweight. There was a total denial about that because the population in general look like their child. Their child may be a little bit above of what the normal population looks like, but they didn't see that as an issue at all", W82GO028                                                                                                                                                                                                                                                                                                                                                                                                                                                 |
| <b>The Social Context</b>                             |                                                                                                                                                                                                                                                                                                                                                                                                                                                                                                                                                                                                                                                                                                                                                                                                         |
| Supportive colleagues                                 | (+) "Once she came on board there was two of us, it was a lot easier to share the workload and if I couldn't be there for a day she could be there for it so I suppose that definitely took the load off and she also acted as a sounding board you know? If there was something I wasn't sure of I could say what do you think about this and vice-versa, you know what I mean?", W82GO016                                                                                                                                                                                                                                                                                                                                                                                                             |
| Leadership                                            | (+) "I mean if we didn't have her pulling all those people and bits together it wouldn't have worked. She did a great job in I think the co-ordination role cause I think running something like this with people dispersed across a whole county and city then you need a project manager on the ground.", W82GO017                                                                                                                                                                                                                                                                                                                                                                                                                                                                                    |
| Collaboration between national and local teams        | (-) "There was a feeling at a national level that this was just going to be rolled out like 3 a week kind of thing and that everyone would take up on it", W82GO009                                                                                                                                                                                                                                                                                                                                                                                                                                                                                                                                                                                                                                     |
| <b>The Organisational Context</b>                     |                                                                                                                                                                                                                                                                                                                                                                                                                                                                                                                                                                                                                                                                                                                                                                                                         |
| MDT Structure (logistics)                             | (-) "I suppose one of the challenges definitely is that the health professionals are all in different places", W82GO004                                                                                                                                                                                                                                                                                                                                                                                                                                                                                                                                                                                                                                                                                 |
| Resources                                             | (-) "I guess time constraints 'cause a lot of people were pressurised for time. Like even ourselves we wouldn't have been able to go to every session and I would have liked to have gone but we just couldn't. We didn't have the time. We didn't have the staff to be able to attend so i think time and resource pressures were the main concerns", W82GO013                                                                                                                                                                                                                                                                                                                                                                                                                                         |
| Training                                              | (-) "It (the training) was as if they were trying to sell us the programme when you know we were already there. We were already sold. I mean we knew why it was important... because of the obesity issue so there was no need to go over all that again. They should have just focused on how to actually implement and deliver the programme", W82GO011                                                                                                                                                                                                                                                                                                                                                                                                                                               |
| <b>External Environment</b>                           |                                                                                                                                                                                                                                                                                                                                                                                                                                                                                                                                                                                                                                                                                                                                                                                                         |
| Lack of existing services                             | (+) "There is nothing out there so that's where it was great to have something like W82GO. That if you did see a child that you know there was something. Some sort of pathway"                                                                                                                                                                                                                                                                                                                                                                                                                                                                                                                                                                                                                         |
| Media                                                 | (+) "There was a huge media campaign ongoing around the time we were implementing the programme which got some parents thinking and talking. I mean those things do have a big impact. Things like Operation Transformation that's aired in January have a huge impact. I think we need more media on the impact of childhood obesity and not just the long-term impacts", W82GO003<br><br>(-) "I think maybe it's (obesity) hyped up a little bit in the media. I think maybe that in itself could be making things difficult for parents to come forward. We don't have any other disease related issue hyped up as much you know? If you had a child with obesity you would be feeling a small bit cringe like. You'd be wanting to find somewhere private to get some help like you know", W82GO020 |
| Stigma                                                | (-) "Wouldn't have their child come to a programme in case they'd be labelled overweight or obese. There is a stigma and just from hearing again I wasn't in the parents room, but just from hearing other colleagues feedback it's the parents fear of feeling judged and                                                                                                                                                                                                                                                                                                                                                                                                                                                                                                                              |

|  |                          |
|--|--------------------------|
|  | <i>blamed</i> ",W82GO002 |
|--|--------------------------|

(+) Facilitators, (-) Barriers.

### The Innovation

In terms of the *W82GO-community* pilot programme (innovation), while stakeholders believed it came from a credible source having been developed by one of the national children's hospitals in Ireland, many had doubts over its accessibility and about how well it would transfer to the community setting. This uncertainty resulted in feelings of unease and community practitioners were hesitant to get involved initially. One stakeholder explained how she worried at length about what impact the programme would have on existing services and how feasible it was to run in the community; *"The setting is different. We were taking a programme that was from an acute setting into the community - that possibly was where the breakdown happened because you didn't have the same services. You didn't have people on site. There was travel, there was all these other logistics that weren't thought about when they were moving an acute programme to the community"*, W82GO021. In particular, stakeholders believed they were dealing with a very different cohort of families than the hospital-based programme as described by the following quote; *"You've a very different kind of child coming into the hospital than you do in the general community. You've a very different kind of parent. Even if you had a parent who was resistant to hearing about their child being overweight, if they are attending hospital appointments regularly they are obviously already engaged about their child's health... so I believe that's a major barrier straight away that they possibly didn't have to face in the hospital you know?"*, W82GO010.

In addition to the differences in the target group, stakeholders believed the programme was too medicalised for the community setting and some felt it did not fit with their perception of a healthy lifestyle programme. This was due to the number of health professionals involved and in particular, the involvement of medical staff. Furthermore, many stakeholders thought the collection of clinical markers of disease and medical history during the initial assessments was unnecessary. As one stakeholder described; *"the initial assessments were totally irrelevant. I mean when I heard that bloods were being taken I thought oh for God sake. You know we were supposed to be running a community-based education intervention where the focus should be on changing lifestyles. It's not our job to be diagnosing other problems"*, W82GO005.

### Individual Professional

While stakeholders both applauded and recognised the need for such an approach to the treatment of childhood obesity, the multidisciplinary nature of the programme created significant barriers to programme implementation. The variety of community health professionals involved in the implementation of *W82GO-community* with differing perspectives and priorities led to role uncertainty and in some cases a perception of disrespect between disciplines. One stakeholder captures this theme in the following quote; *“I suppose the other main challenge was the multidisciplinary nature of the programme. I think the challenge is when you put together a team obviously from all different backgrounds not with different agendas but with different experiences and knowledge and different perspectives”*, W82GO026. Stakeholders described how *“there was quite a lack of understanding of the various discipline roles and responsibilities and some were even unsure of what some disciplines did”*, W82GO012. This lack of understanding sometimes resulted in tension between disciplines and created a challenging environment to work in. Others recalled feeling concerned about where they fit into the programme and believed a structured programme plan outlining specific roles and responsibilities was lacking.

Another key barrier that emerged at the level of the individual professional was their low perceived self-efficacy in dealing with childhood obesity and/or working with this young age group. In particular, many stakeholders reported their fear of approaching the subject with parents given the risk of upsetting them or *“rocking the boat”*. One stakeholder reported that *“it’s something you want to do something about but it can be very difficult to approach the subject with parents. It’s a very sensitive issue”*, W82GO001. In our study, stakeholders in Site A received motivational interviewing workshops for childhood obesity. This training equipped these stakeholders with increased skills and confidence in working with families on weight management issues. As one stakeholder described, post motivational interviewing training she wasn’t *“frightened of dealing with them [parents] at all”, It’s kind of second nature to me now... I know the buzz words, I know exactly what to say to them. And body language, the whole lot”*, W82GO002. Others felt it was quite *“alien”* to work with children aged 4-6 years and believed they hadn’t the appropriate training to do so.

1  
2  
3 Despite these barriers, all stakeholders were aware that childhood obesity was an issue in their respective  
4 communities and recognised the urgent need for treatment; *"Yeah I think it's a time bomb that went off over*  
5 *the past ten years and that we are behind it, way behind and the sooner we get going and doing whatever we*  
6 *can the better"*, W82GO012. Furthermore, stakeholders' personal interest in tackling the issue, and their  
7 motivation and dedication to seeing the programme through were what many believed to be the main drivers  
8 behind programme completion; *"It went ahead due to a lot of determination and not because it was easily*  
9 *implementable... if that's a word"*, W82GO014.  
10  
11

### 12 **Patient**

13  
14  
15  
16  
17  
18  
19  
20 Low programme uptake was a key issue during implementation. Many stakeholders believe that obesity has  
21 become the norm in society and as a result *"people don't recognise overweight people as being in that actual*  
22 *overweight category because it's become normal to be surrounded by overweight people"*, W82GO021. In  
23 terms of the *W82GO-community* pilot programme, almost all stakeholders indicated that although children  
24 measured as obese on the growth charts their parents seemed unaware of any excess weight and once  
25 informed, many refused to accept that their child was obese. As a result of this misperception parents did not  
26 realise or accept the need for treatment. Speaking of her experience, one stakeholder described how *"other*  
27 *parents just didn't reply or didn't get in touch because they believed everything was ok and there wasn't a*  
28 *problem with their child. They didn't need any programme. I think that definitely was a huge problem out there*  
29 *in the community setting"*, W82GO012. Because of this low recognition amongst parents, many stakeholders  
30 recalled the resistance they faced when trying to discuss the issue with them and their fear prior to making  
31 contact with parents. One stakeholder explained how some parents would *"be really angry so you're taking*  
32 *angry phone calls in the evening. You know when you come in from a day's work so it was really difficult"*,  
33  
34  
35  
36  
37  
38  
39  
40  
41  
42  
43  
44  
45  
46  
47  
48  
49  
50  
51  
52  
53  
54  
55  
56  
57  
58  
59  
60  
W82GO002.

### 58 **Social Context**

59  
60  
61  
62  
63  
64  
65  
66  
67  
68  
69  
70  
71  
72  
73  
74  
75  
76  
77  
78  
79  
80  
81  
82  
83  
84  
85  
86  
87  
88  
89  
90  
91  
92  
93  
94  
95  
96  
97  
98  
99  
100  
Local level stakeholders believed there was a certain level of *"naïvety"* at national level about the reality of  
rolling out the pilot programme on the ground. They felt consultation during the planning stage was lacking  
and that national-level stakeholders had *"little experience of the practical aspects of childhood obesity"* as *"no*  
*one was actually working with obese children or even groups on a day to day basis"*, W82GO004. As a result

1  
2  
3 unrealistic expectations and timeframes prevailed, particularly during the recruitment phase. This led to  
4 frustration and confusion among local-level health professionals during implementation.  
5  
6

7  
8 Communication between national and local level stakeholders was considered poor. However, the presence of  
9 a local lead facilitated the exchange between staff on the ground and management at national level and was  
10 seen by almost all stakeholders as crucial for programme implementation. Furthermore, stakeholders felt that  
11 because of the multidisciplinary approach of the programme *"you needed someone on the ground"*; if they did  
12 not have a local lead *"pulling all those people and bits together, it wouldn't have worked because running*  
13 *something like this with people dispersed across a whole county and city is difficult"*, W82GO005. The presence  
14 of supportive colleagues and management were identified as further enabling factors.  
15  
16  
17  
18  
19  
20

### 21 **Organisational Context**

22  
23 The multidisciplinary structure of the programme also created barriers at the organisational level. In addition  
24 to differing individual perspectives and priorities, the added complexities of working in different locations  
25 created difficulties during programme implementation. In many cases stakeholders didn't *"work at the same*  
26 *site... or even the same town which was a challenge"* as it *"took up a lot of time organising between schedules*  
27 *and travelling to meet and go through practicalities"*, W82GO007.  
28  
29

30  
31 In addition to these challenges, at the organisational level, stakeholders reported that implementation was  
32 hampered due to insufficient resources (i.e. staff and time) and training. It was reported that two other  
33 proposed areas withdrew from the pilot programme because of the lack of staff and leadership on the ground  
34 to run the programme. Stakeholders felt that they had very different resource issues to the hospital-based  
35 teams who are *"within the confines of a hospital... so they would or should have the same vision or focus...  
36 whereas we can see now with a community based programme the professionals can be very different in their  
37 training, they can have a different ethos in the departments within their community. It's very individual. We  
38 have different line managers and different resources to deal with"*, W82GO011. Some stakeholders *"didn't  
39 want to get involved because of existing workloads"*, and the lack of extra resources or allocated time to  
40 implement the pilot. Furthermore, while acknowledging the little time hospital staff had to develop  
41 community-specific training, local-level stakeholders felt they needed more *"practical and tailored"*  
42 information. Many described the training they received as *'too general'* and stated that *"it would have been  
43  
44  
45  
46  
47  
48  
49  
50  
51  
52  
53  
54  
55  
56  
57  
58  
59  
60*

1  
2  
3 *very helpful to have had more practical tips on how to actually run the programme session to session with this*  
4 *age group”, W82GO012.*

### 7 **External Environment**

8  
9  
10 In the Grol and Wensing model, the ‘economic and political context’ refers to financial arrangements,  
11 regulations and policies - themes which did not emerge during our research. Therefore, the sixth level was  
12 renamed ‘external environment’ to include wider societal perspectives and determinants.  
13  
14

15  
16 In terms of the external environment, the lack of existing services to treat and manage childhood obesity  
17 meant many stakeholders were excited to come on board and implement this new initiative. One stakeholder  
18 described *“waiting for years for something to happen in this area”, W82GO005.* The media was recognised as  
19 both a barrier and a facilitator to programme implementation. While stakeholders believed TV and radio  
20 campaigns have the potential to raise awareness they felt that the issue is *“also getting very bad press”* and  
21 being *“hyped up a little bit”* which in itself may make it more difficult for parents to come forward.  
22 Additionally, staff felt that the stigma surrounding childhood obesity and weight management programmes  
23 created a significant barrier to programme implementation as they believed many parents were reluctant to  
24 attend or even talk about the issue of weight for fear of singling out or *‘labelling’* their child.  
25  
26  
27  
28  
29  
30  
31  
32  
33  
34

### 35 **Vision for the future**

36  
37 In terms of the future scale up of *W82GO-community*, the majority of stakeholders recommend establishing  
38 dedicated childhood obesity teams within the community, *“ideally people who are located at least in the same*  
39 *town”,* who can offer a range of interventions for different levels of need. One stakeholder described *“a tiered*  
40 *effect, for example there could be a level one which could be a generic workshop or talk that you could roll-out*  
41 *in lots of schools. A level two then would be a seminar for parents and level three would be a group*  
42 *programme. Level four then could be actual specific one on one interventions”.* Having a tiered approach would  
43 enable the team to match the level of need with the family and allow families to choose where on the scale  
44 they would best fit.  
45  
46  
47  
48  
49  
50  
51  
52

### 53 **DISCUSSION**



1  
2  
3 This study identifies the barriers and facilitators to implementing a community-based weight management  
4 programme from the perspective of stakeholders tasked with delivering such a programme. While community-  
5 based weight management programmes have become an important response to the obesity epidemic given  
6 their potential reach and accessibility for families, the majority are based on small, efficacy trials [2] and little is  
7 known about the factors influencing their implementation in real-world settings. Our findings suggest that  
8 more consideration is needed during the planning stages, including the creation of a structured programme  
9 plan outlining specific roles and responsibilities. Local-level stakeholders believe they should be involved in this  
10 process as they have practical experience of working with families on the ground in their respective  
11 communities.

12  
13  
14  
15  
16  
17  
18  
19  
20  
21 A key barrier to the implementation of *W82GO-community* was perceived parental resistance which occurred  
22 at the patient level but is also intrinsically linked to the external environment where the increasing  
23 normalisation of overweight and obesity coexists with a stigma that surrounds the issue. Stakeholders  
24 delivering the programme described parental resistance occurring at every stage of the implementation  
25 process and suggested that parents did not appear to recognise the issue in their own children. As a result  
26 stakeholders believed that parents did not see the need for treatment or refused to accept that their child was  
27 carrying excess weight. While parental attitudes reported in this study were based on the perceptions of staff,  
28 a lack of parental awareness regarding their child's weight and resistance towards discussing weight issues has  
29 been documented in previous research [19-23]. This may be due in part to the belief that obesity has become  
30 the norm in society, a point which was suggested by stakeholders in this study, and previously outlined in the  
31 literature [24]. It is also possible that parental resistance stems from the stigma that is associated with excess  
32 weight and obesity [8, 20-22] or the negative media attention obesity has received. The framing of coverage by  
33 media may affect people's views about the causes of childhood obesity and the most appropriate strategies  
34 for addressing the problem [25]. Our findings highlight the need, at a policy level, for positive awareness-  
35 raising campaigns to encourage parental recognition of healthy childhood growth and development, in  
36 addition to knowledge regarding the importance of identifying obesity early in childhood.

37  
38  
39  
40  
41  
42  
43  
44  
45  
46  
47  
48  
49  
50  
51  
52  
53  
54  
55  
56  
57  
58  
59  
60  
61  
62  
63  
64  
65  
66  
67  
68  
69  
70  
71  
72  
73  
74  
75  
76  
77  
78  
79  
80  
81  
82  
83  
84  
85  
86  
87  
88  
89  
90  
91  
92  
93  
94  
95  
96  
97  
98  
99  
100  
101  
102  
103  
104  
105  
106  
107  
108  
109  
110  
111  
112  
113  
114  
115  
116  
117  
118  
119  
120  
121  
122  
123  
124  
125  
126  
127  
128  
129  
130  
131  
132  
133  
134  
135  
136  
137  
138  
139  
140  
141  
142  
143  
144  
145  
146  
147  
148  
149  
150  
151  
152  
153  
154  
155  
156  
157  
158  
159  
160  
161  
162  
163  
164  
165  
166  
167  
168  
169  
170  
171  
172  
173  
174  
175  
176  
177  
178  
179  
180  
181  
182  
183  
184  
185  
186  
187  
188  
189  
190  
191  
192  
193  
194  
195  
196  
197  
198  
199  
200  
201  
202  
203  
204  
205  
206  
207  
208  
209  
210  
211  
212  
213  
214  
215  
216  
217  
218  
219  
220  
221  
222  
223  
224  
225  
226  
227  
228  
229  
230  
231  
232  
233  
234  
235  
236  
237  
238  
239  
240  
241  
242  
243  
244  
245  
246  
247  
248  
249  
250  
251  
252  
253  
254  
255  
256  
257  
258  
259  
260  
261  
262  
263  
264  
265  
266  
267  
268  
269  
270  
271  
272  
273  
274  
275  
276  
277  
278  
279  
280  
281  
282  
283  
284  
285  
286  
287  
288  
289  
290  
291  
292  
293  
294  
295  
296  
297  
298  
299  
300  
301  
302  
303  
304  
305  
306  
307  
308  
309  
310  
311  
312  
313  
314  
315  
316  
317  
318  
319  
320  
321  
322  
323  
324  
325  
326  
327  
328  
329  
330  
331  
332  
333  
334  
335  
336  
337  
338  
339  
340  
341  
342  
343  
344  
345  
346  
347  
348  
349  
350  
351  
352  
353  
354  
355  
356  
357  
358  
359  
360  
361  
362  
363  
364  
365  
366  
367  
368  
369  
370  
371  
372  
373  
374  
375  
376  
377  
378  
379  
380  
381  
382  
383  
384  
385  
386  
387  
388  
389  
390  
391  
392  
393  
394  
395  
396  
397  
398  
399  
400  
401  
402  
403  
404  
405  
406  
407  
408  
409  
410  
411  
412  
413  
414  
415  
416  
417  
418  
419  
420  
421  
422  
423  
424  
425  
426  
427  
428  
429  
430  
431  
432  
433  
434  
435  
436  
437  
438  
439  
440  
441  
442  
443  
444  
445  
446  
447  
448  
449  
450  
451  
452  
453  
454  
455  
456  
457  
458  
459  
460  
461  
462  
463  
464  
465  
466  
467  
468  
469  
470  
471  
472  
473  
474  
475  
476  
477  
478  
479  
480  
481  
482  
483  
484  
485  
486  
487  
488  
489  
490  
491  
492  
493  
494  
495  
496  
497  
498  
499  
500  
501  
502  
503  
504  
505  
506  
507  
508  
509  
510  
511  
512  
513  
514  
515  
516  
517  
518  
519  
520  
521  
522  
523  
524  
525  
526  
527  
528  
529  
530  
531  
532  
533  
534  
535  
536  
537  
538  
539  
540  
541  
542  
543  
544  
545  
546  
547  
548  
549  
550  
551  
552  
553  
554  
555  
556  
557  
558  
559  
560  
561  
562  
563  
564  
565  
566  
567  
568  
569  
570  
571  
572  
573  
574  
575  
576  
577  
578  
579  
580  
581  
582  
583  
584  
585  
586  
587  
588  
589  
590  
591  
592  
593  
594  
595  
596  
597  
598  
599  
600  
601  
602  
603  
604  
605  
606  
607  
608  
609  
610  
611  
612  
613  
614  
615  
616  
617  
618  
619  
620  
621  
622  
623  
624  
625  
626  
627  
628  
629  
630  
631  
632  
633  
634  
635  
636  
637  
638  
639  
640  
641  
642  
643  
644  
645  
646  
647  
648  
649  
650  
651  
652  
653  
654  
655  
656  
657  
658  
659  
660  
661  
662  
663  
664  
665  
666  
667  
668  
669  
670  
671  
672  
673  
674  
675  
676  
677  
678  
679  
680  
681  
682  
683  
684  
685  
686  
687  
688  
689  
690  
691  
692  
693  
694  
695  
696  
697  
698  
699  
700  
701  
702  
703  
704  
705  
706  
707  
708  
709  
710  
711  
712  
713  
714  
715  
716  
717  
718  
719  
720  
721  
722  
723  
724  
725  
726  
727  
728  
729  
730  
731  
732  
733  
734  
735  
736  
737  
738  
739  
740  
741  
742  
743  
744  
745  
746  
747  
748  
749  
750  
751  
752  
753  
754  
755  
756  
757  
758  
759  
760  
761  
762  
763  
764  
765  
766  
767  
768  
769  
770  
771  
772  
773  
774  
775  
776  
777  
778  
779  
780  
781  
782  
783  
784  
785  
786  
787  
788  
789  
790  
791  
792  
793  
794  
795  
796  
797  
798  
799  
800  
801  
802  
803  
804  
805  
806  
807  
808  
809  
810  
811  
812  
813  
814  
815  
816  
817  
818  
819  
820  
821  
822  
823  
824  
825  
826  
827  
828  
829  
830  
831  
832  
833  
834  
835  
836  
837  
838  
839  
840  
841  
842  
843  
844  
845  
846  
847  
848  
849  
850  
851  
852  
853  
854  
855  
856  
857  
858  
859  
860  
861  
862  
863  
864  
865  
866  
867  
868  
869  
870  
871  
872  
873  
874  
875  
876  
877  
878  
879  
880  
881  
882  
883  
884  
885  
886  
887  
888  
889  
890  
891  
892  
893  
894  
895  
896  
897  
898  
899  
900  
901  
902  
903  
904  
905  
906  
907  
908  
909  
910  
911  
912  
913  
914  
915  
916  
917  
918  
919  
920  
921  
922  
923  
924  
925  
926  
927  
928  
929  
930  
931  
932  
933  
934  
935  
936  
937  
938  
939  
940  
941  
942  
943  
944  
945  
946  
947  
948  
949  
950  
951  
952  
953  
954  
955  
956  
957  
958  
959  
960  
961  
962  
963  
964  
965  
966  
967  
968  
969  
970  
971  
972  
973  
974  
975  
976  
977  
978  
979  
980  
981  
982  
983  
984  
985  
986  
987  
988  
989  
990  
991  
992  
993  
994  
995  
996  
997  
998  
999  
1000

Low perceived self-efficacy in approaching the subject of weight with parents was a barrier facing staff during implementation. Stakeholders in this study see the need for a childhood weight management programme in their communities and acknowledge their professional responsibility to get involved. However, they appear

1  
2  
3 uncomfortable and unequipped to do this. This is consistent with previous research which found that low  
4 perceived skills and low perceived self-efficacy hamper the implementation of such programmes [19, 26-29]. In  
5 our study motivational interviewing workshops equipped stakeholders in Site A with increased skills and  
6 confidence in working with families on weight management issues. Motivational interviewing is a goal-  
7 orientated, patient-centred approach based on the use of communication skills to understand individuals'  
8 motivation for behaviour change [30] and has been found to be useful when applied in health care settings  
9 [31]. We therefore consider it important that healthcare professionals involved in the implementation of  
10 obesity programmes receive this training prior to programme commencement.

11  
12  
13  
14  
15  
16  
17  
18  
19 The multidisciplinary structure of the programme emerged as both a barrier to and facilitator of  
20 implementation and spread across many of the levels outlined by Grol and Wensing. While acknowledged that  
21 it was required to treat such a complex health issue, it resulted in lack of role clarity, a lack of understanding of  
22 specific discipline roles, and led to difficulties in scheduling. This may in part be due to the structure and  
23 governance of community health services within Ireland. While there is a vision for multidisciplinary working  
24 set out in multiple policy documents and an emphasis on integrated care [32], the system is not set-up to  
25 support the concept. Stakeholders believe a simple roundtable introduction whereby practitioners could share  
26 their professional background and outline their specific role within the project would have helped overcome  
27 this ambiguity. They suggest it is a simple but often overlooked detail. Furthermore, stakeholders feel the  
28 establishment of a local lead was critical in assisting multidisciplinary working while also facilitating discussion  
29 between national and local level. Laws et al. also highlight the importance of having key local individuals  
30 responsible for driving and coordinating research translation [33].

31  
32  
33  
34  
35  
36  
37  
38  
39  
40  
41  
42  
43 Finally, an important finding from this research was the inherent problems in a '*one size fits all*' approach to  
44 community-based treatment. Stakeholders in our study suggest a tiered approach may be more suitable,  
45 beginning with a brief intervention which intensifies based on a child's degree of obesity, the family's  
46 motivation, and the capacity of the community and/or healthcare provider. This finding is in line with a  
47 suggestion from Staniford et al. who suggest that future interventions should tailor treatment according to  
48 participants' age, degree of obesity and their readiness or confidence to change [34]. In addition to tailoring a  
49 programme to the individual, programmes need to be adapted for the community setting. Stakeholders in our  
50 study raised concerns that the W82GO programme, having been developed in a hospital setting, was too  
51  
52  
53  
54  
55  
56  
57  
58  
59  
60

1  
2  
3 medicalised for community practice. In particular, the lengthy assessment process which in some cases  
4 involved blood tests and the presence of medically trained doctors, was unnecessary for a community-based  
5 lifestyle programme. This finding is consistent with previous research conducted by Watson et al. who  
6 evaluated a family-based childhood obesity treatment intervention and found they needed to modify the  
7 assessment process by replacing community paediatrician assessments with parent/carer self-completion forms  
8 for reasons of time and cost [35]. To develop a full picture of treatment, future research should examine what  
9 aspects of the programme work, for whom, in what context and why.

10  
11 While this study provides important insight into the implementation of childhood obesity programme in the  
12 community, several limitations should be acknowledged. According to de Casterlé *et al.*, (2012) "*using a*  
13 *preconceived framework runs the risk of prematurely excluding alternative ways of organising the*  
14 *data*"[36]pg.362. However, data was analysed inductively first before mapping emergent themes onto the Grol  
15 and Wensing Framework. In subsequent phases of analysis we adapted the framework to capture the  
16 influence of the external environment on implementation. Social desirability bias is a risk when stakeholders  
17 are known to the researcher conducting the interviews. In this case the stakeholders knew the researcher as  
18 the programme evaluator. However, we do not believe this bias had an effect as stakeholders were keen to  
19 "*tell their story*". It is also important to note that parental attitudes reported in this study were based on the  
20 perceptions of staff delivering the programme. Other studies have identified differences between parents,  
21 staff and children in terms of their attitudes towards childhood obesity treatment [34]. We are conducting  
22 further research with parents and children to understand the factors influencing their decisions to engage or  
23 disengage with obesity treatment.

## 24 25 26 27 28 29 30 31 32 33 34 35 36 37 38 39 40 41 42 43 **CONCLUSION**

44  
45  
46 In light of the dearth of knowledge available on the translation of multi-component childhood weight  
47 management programmes to community settings, this study highlights the barriers and facilitators to  
48 implementing such programmes from a wide range of community healthcare and admin perspectives. Our  
49 results suggest the assignment of clear roles and responsibilities, the provision of sufficient practical training  
50 and resources, and organisational support play pivotal roles in overcoming barriers to change. Furthermore,  
51 our findings on the challenges of multidisciplinary working and translating hospital programmes to community  
52 settings are applicable to the implementation of interventions beyond that of childhood weight management.

1  
2  
3 This evidence should be used to develop implementation plans to improve the translation of interventions into  
4  
5 real world settings.  
6

7 **STATEMENTS:**  
8

- 9  
10
  - Authors' contributions

11  
12 The authors responsibilities were as follows: EK: was responsible for the design and conduct of the research,  
13 and writing of the manuscript. SMH: was involved in data analysis and reviewed drafts of the manuscript. EK,  
14 SMH, JH, FS and IJP made critical revisions to the paper and gave final approval of the version to be submitted.  
15  
16  
17

- 18  
19
  - Acknowledgements

20  
21 We are grateful to the stakeholders who agreed to be interviewed for the study, without them this research  
22 would not have been possible.  
23

- 24  
25
  - Competing interests

26  
27 The authors declare that they have no competing interests  
28

- 29  
30
  - Funding

31  
32 Source of support: E Kelleher is funded by the Health Research Board SPHeRE/2013/1. The Health Research  
33 Board (HRB) supports excellent research that improves people's health, patient care and health service  
34 delivery. We aim to ensure that new knowledge is created and then used in policy and practice. In doing so, we  
35 support health system innovation and create new enterprise opportunities. Dr Sheena McHugh is funded by  
36 the Centre for Ageing Research and Development in Ireland (CARDI), now the Ageing Research and  
37 Development Division within the Institute of Public Health in Ireland (IPH).  
38  
39  
40  
41  
42  
43  
44  
45

- 46  
47
  - Data Sharing

48  
49 Topic guides which were used in the interviews are available as additional supporting files. However, signed  
50 confidentiality agreements prevent us from sharing transcripts.  
51

- 52  
53
  - Ethics approval

54  
55 Ethical Approval was granted by the Clinical Research Ethics Committee of the Cork Teaching Hospitals.  
56  
57  
58  
59  
60

## References

1. Flynn, M., D. McNeil, B. Maloff, et al., Reducing obesity and related chronic disease risk in children and youth: a synthesis of evidence with 'best practice' recommendations. *Obes Rev*, 2006. **7 Suppl 1**: p. 7-66.
2. Oude Luttikhuis, H., L. Baur, H. Jansen, et al., Interventions for treating obesity in children. *Cochrane Database Syst Rev*, 2009(1): p. Cd001872.
3. Wilfley, D., A. Staiano, M. Altman, et al., Improving access and systems of care for evidence-based childhood obesity treatment: Conference key findings and next steps. *Obesity (Silver Spring)*, 2016.
4. National Institute for Health and Clinical Excellence (NICE). Weight management: lifestyle services for overweight or obese children and young people. Clinical Guideline, 47. 2013, NICE: London.
5. World Health Organisation., Report of the Commission on Ending Childhood Obesity. 2016, WHO Document Production Services: Geneva, Switzerland.
6. Nutbeam, D. and A. Bauman, Evaluation in a Nutshell: a practical guide to the evaluation of health promotion programs. Vol. 2. 2013, Australia: McGraw-Hill Education.
7. Welsby, D., B. Nguyen, B. O'Hara, et al., Process evaluation of an up-scaled community based child obesity treatment program: NSW Go4Fun(R). *BMC Public Health*, 2014. **14**: p. 140.
8. Lucas, P., K. Curtis-Tyler, L. Arai, et al., What works in practice: user and provider perspectives on the acceptability, affordability, implementation, and impact of a family-based intervention for child overweight and obesity delivered at scale. *BMC Public Health*, 2014. **14**: p. 614.
9. Stamatakis, K., C. Vinson, and J. Kerner, Dissemination and Implementation Research in Community and Public Health Settings, in *Dissemination and Implementation Research in Health: Translating Science to Practice*, R. Brownson, G. Colditz, and E. Proctor, Editors. 2012, Oxford University Press: New York.
10. Skelton, J. and B. Beech, Attrition in paediatric weight management: a review of the literature and new directions. *Obes Rev*, 2011. **12**(5): p. e273-81.
11. Kelleher, E., M. Davoren, J. Harrington, et al., Barriers and facilitators to initial and continued attendance at community-based lifestyle programmes among families of overweight and obese children: a systematic review. *Obes Rev*, 2016.
12. Keane, E., P. Kearney, I. Perry, et al., Trends and prevalence of overweight and obesity in primary school aged children in the Republic of Ireland from 2002-2012: a systematic review. *BMC Public Health*, 2014. **14**(1): p. 974.
13. Layte, R. and C. McCrory, Growing Up in Ireland. Overweight and Obesity among 9-year olds. 2011, Department of Children and Youth Affairs: Dublin.
14. O'Malley, G., A. Brinkley, K. Moroney, et al., Is the Temple Street W82GO Healthy Lifestyles Programme effective in reducing BMI SDS? . *Obes Facts*, 2012. **5**(Suppl. 1): p. 178-234
15. Hoffmann, T., P. Glasziou, I. Boutron, et al., Better reporting of interventions: template for intervention description and replication (TIDieR) checklist and guide. *BMJ*, 2014. **348**: p. g1687.
16. National Institute for Health and Clinical Excellence (NICE). Obesity. Guidance on the prevention of overweight and obesity in adults and children. Clinical Guideline, 43. 2015, NICE: London.
17. Ritchie, J. and J. Lewis, Qualitative research practice: a guide for social science students & researchers. 2003, Thousand Oaks: Sage Publications.
18. Grol, R. and M. Wensing, What drives change? Barriers to and incentives for achieving evidence-based practice. *Med J Aust*, 2004. **180**(6 Suppl): p. S57-60.

- 1
  - 2
  - 3
  - 4
  - 5
  - 6
  - 7
  - 8
  - 9
  - 10
  - 11
  - 12
  - 13
  - 14
  - 15
  - 16
  - 17
  - 18
  - 19
  - 20
  - 21
  - 22
  - 23
  - 24
  - 25
  - 26
  - 27
  - 28
  - 29
  - 30
  - 31
  - 32
  - 33
  - 34
  - 35
  - 36
  - 37
  - 38
  - 39
  - 40
  - 41
  - 42
  - 43
  - 44
  - 45
  - 46
  - 47
  - 48
  - 49
  - 50
  - 51
  - 52
  - 53
  - 54
  - 55
  - 56
  - 57
  - 58
  - 59
  - 60
19. Gerards, S.M., P. Dagnelie, M. Jansen, et al., Barriers to successful recruitment of parents of overweight children for an obesity prevention intervention: a qualitative study among youth health care professionals. *BMC Fam Pract*, 2012. **13**: p. 37.
20. Grow, H., C. Hsu, L. Liu, et al., Understanding family motivations and barriers to participation in community-based programs for overweight youth: one program model does not fit all. *J Public Health Manag Pract*, 2013. **19**(4): p. E1-e10.
21. Visram, S., T.D. Hall, and L. Geddes, Getting the balance right: qualitative evaluation of a holistic weight management intervention to address childhood obesity. *J Public Health (Oxf)*, 2012.
22. Newson, L., R. Povey, A. Casson, et al., The experiences and understandings of obesity: families' decisions to attend a childhood obesity intervention. *Psychol Health*, 2013. **28**(11): p. 1287-305.
23. Shiely, F., N. Hon Yan, E. Berkery, et al., The association between weight perception and BMI: Report and measurement data from the growing up in Ireland cohort study of 9 year olds. *Int J Obes*, 2016.
24. Binkin, N., A. Spinelli, G. Baglio, et al., What is common becomes normal: the effect of obesity prevalence on maternal perception. *Nutr Metab Cardiovasc Dis*, 2013. **23**(5): p. 410-6.
25. Barry, C., M. Jarlenski, R. Grob, et al., News Media Framing of Childhood Obesity in the United States From 2000 to 2009. *Pediatrics*, 2011.
26. Moyers, P., L. Bugle, and E. Jackson, Perceptions of school nurses regarding obesity in school-age children. *J Sch Nurs*, 2005. **21**(2): p. 86-93.
27. Steele, R., Y. Wu, C. Jensen, et al., School nurses' perceived barriers to discussing weight with children and their families: a qualitative approach. *J Sch Health*, 2011. **81**(3): p. 128-37.
28. Story, M., D. Neumark-Stzainer, N. Sherwood, et al., Management of child and adolescent obesity: attitudes, barriers, skills, and training needs among health care professionals. *Pediatrics*, 2002. **110**(1 Pt 2): p. 210-4.
29. Turner, K., J. Shield, and C. Salisbury, Practitioners' views on managing childhood obesity in primary care: a qualitative study. *The British Jof Gen Pract*, 2009. **59**(568): p. 856-862.
30. Miller, W. and S. Rollnick, *Motivational Interviewing: Preparing people for change*. 2002, New York: The Guilford Press.
31. Lozano, P., H. McPhillips, B. Hartzler, et al., Randomized trial of teaching brief motivational interviewing to pediatric trainees to promote healthy behaviors in families. *Arch Pediatr Adolesc Med*, 2010. **164**(6): p. 561-6.
32. Department of Health., *A Healthy Weight for Ireland 2016–2025. Obesity Policy and Action Plan 2016*, Stationary Office: Dublin.
33. Laws, R., K. Hesketh, K. Ball, et al., Translating an early childhood obesity prevention program for local community implementation: a case study of the Melbourne INFANT Program. *BMC Public Health*, 2016. **16**: p. 748.
34. Staniford, L.J., J.D. Breckon, R.J. Copeland, et al., Key stakeholders' perspectives towards childhood obesity treatment: A qualitative study. *Journal of Child Health Care*, 2011. **15**(3): p. 230-244.
35. Watson, P., L. Dugdill, K. Pickering, et al., Service evaluation of the GOALS family-based childhood obesity treatment intervention during the first 3 years of implementation. *BMJ Open*, 2015. **5**(2).
36. Dierckx de Casterle, B., C. Gastmans, E. Bryon, et al., QUAGOL: a guide for qualitative data analysis. *Int J Nurs Stud*, 2012. **49**(3): p. 360-71.

## Supplementary Material 1: Completed TIDieR checklist

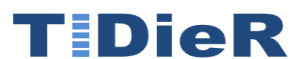

Template for Intervention  
Description and Replication

## The TIDieR (Template for Intervention Description and Replication) Checklist

Information to include when describing an intervention and the location of the information

| Item number | Item                                                                                                                                                                                                                                                                                              |                                                                                                                                                                                                                                                                                                                                                                                                                                                                                                                       |
|-------------|---------------------------------------------------------------------------------------------------------------------------------------------------------------------------------------------------------------------------------------------------------------------------------------------------|-----------------------------------------------------------------------------------------------------------------------------------------------------------------------------------------------------------------------------------------------------------------------------------------------------------------------------------------------------------------------------------------------------------------------------------------------------------------------------------------------------------------------|
|             | <b>BRIEF NAME</b>                                                                                                                                                                                                                                                                                 |                                                                                                                                                                                                                                                                                                                                                                                                                                                                                                                       |
| 1.          | Provide the name or a phrase that describes the intervention.                                                                                                                                                                                                                                     | 'W82GO-community' – a multi-component, family-focused childhood weight management pilot programme delivered in the community setting.                                                                                                                                                                                                                                                                                                                                                                                 |
|             | <b>WHY</b>                                                                                                                                                                                                                                                                                        |                                                                                                                                                                                                                                                                                                                                                                                                                                                                                                                       |
| 2.          | Describe any rationale, theory, or goal of the elements essential to the intervention.                                                                                                                                                                                                            | The W82GO-community programme is a family-focused programme grounded in behavioural change theory (transtheoretical model and social cognitive theory) and aims to reduce obesity in children with BMI $\geq$ 98th percentile, improve children's dietary intake, physical activity levels and weight status while also increasing children's quality of life and psychosocial health.                                                                                                                                |
|             | <b>WHAT</b>                                                                                                                                                                                                                                                                                       |                                                                                                                                                                                                                                                                                                                                                                                                                                                                                                                       |
| 3.          | Materials: Describe any physical or informational materials used in the intervention, including those provided to participants or used in intervention delivery or in training of intervention providers. Provide information on where the materials can be accessed (e.g. online appendix, URL). | The W82GO-community programme includes:<br>(1) The W82GO-community pilot programme was delivered by a multi-disciplinary team using a manual developed to support community-based healthcare professionals to deliver the programme in their area. It does so through the provision of a guide to setting up a team and preparing the delivery of the programme; a framework for individual sessions that allows for session preparation and planning including programme presentations on disc; materials, including |

template letters and evaluation forms that can be adapted to suit the local context and information on additional resources that are available to support the team

(2) W82GO leaflet outlining the programmes goals and core elements to be distributed to families during recruitment

(3) W82GO family information booklet including goal setting and additional resources and tips were distributed to all families attending the programme

1  
2  
3  
4  
5  
6  
7  
8  
9  
10  
11  
12  
13  
14 **4.** Procedures: Describe each of the procedures, activities, and/or  
15 processes used in the intervention, including any enabling or support  
16 activities.  
17  
18

Recruitment: heights and weights were measured in school by public health nurses (PHNs) using standardised procedures. Weight and height data was subsequently used to calculate body mass index (BMI) and children were classified as obese if their BMI plotted  $\geq 98$ th BMI percentile for age and gender using the UK90 recommended cut-off points for treatment or referral which are currently used in Irish practice. Parents of children meeting this eligibility criterion were contacted by their school PHN to inform them of their child's weight status and those who indicated an interest in attending the programme were subsequently invited to attend an initial screening assessment.

This individualised initial assessment assessed eligibility before programme commencement. This assessment was carried out by a multidisciplinary team to rule out underlying medical conditions. In addition, indicators of health literacy, health beliefs and physical and environmental variables that might act as barriers to change were recorded.



1  
2  
3  
4  
5  
6  
7  
8  
9  
10  
11  
12  
13  
14  
15  
16  
17  
18  
19  
20  
21  
22  
23  
24  
25  
26  
27  
28  
29  
30  
31  
32  
33  
34  
35  
36  
37  
38  
39  
40  
41  
42  
43  
44  
45  
46  
47

Following the initial assessment six group sessions took places over six weeks and group booster sessions occurred at three, six and nine months. During these group sessions parents and their children received an educational session for the first hour. Children were taken out to complete physical activity for the last 30 minutes while parents an received extra educational session. At 12 months another individualised final assessment took place to document any changes and make plans for sustainment.

### WHO PROVIDED

5. For each category of intervention provider (e.g. psychologist, nursing assistant), describe their expertise, background and any specific training given.

The W82GO community-programme was delivered by a multidisciplinary team of community health professionals including dietitians, physiotherapists, public health nurses, psychologists, health promotion officers, area medical officers, administrators and local area management. These health professionals had varying levels of experience of dealing with childhood obesity and as a result were invited to take part in a training programme prior to programme commencement. Training included a needs assessment, a one day educational training course and two days of clinical shadowing with an experienced W82GO programme practitioner at Temple Street Children's University Hospital in Dublin, Ireland. Each community practitioner was also supplied with a user manual which outlined the programme and detailed the content for both phases.

Public health nurses in one of the sites received motivational interviewing training specific to childhood obesity as part of routine training in the area already being conducted in that area.

### HOW

1  
2  
3  
4  
5  
6  
7  
8  
9  
10  
11  
12  
13  
14

6. Describe the modes of delivery (e.g. face-to-face or by some other mechanism, such as internet or telephone) of the intervention and whether it was provided individually or in a group.

The W82GO-community programme involved face-to-face sessions and included a mixture of group and individualised sessions as outlined above.

15  
16

**WHERE**

17  
18  
19  
20  
21  
22  
23  
24  
25  
26  
27  
28  
29  
30  
31  
32

7. Describe the type(s) of location(s) where the intervention occurred, including any necessary infrastructure or relevant features.

Initial assessments took place in community healthcare offices. Subsequent group sessions were delivered on weekdays in the afternoon at a local sports or community centre.

33  
34  
35  
36  
37  
38  
39  
40  
41  
42  
43  
44

**WHEN and HOW MUCH**

8. Describe the number of times the intervention was delivered and over what period of time including the number of sessions, their schedule, and their duration, intensity or dose.

The programme was run in two sites (Site A and Site B) over 12 months. The individual assessment lasted approximately one and half to two hours. The initial intensive phase consisted of 6 weekly group sessions for both the child and his/her parent/carer and these occurred over one afternoon a week and lasted approximately one and a half to two hours. The three booster sessions at three, six and nine months lasted approximately one to one and a half hours. During these group sessions parents and their children received an educational session for the first hour. Children were taken out to complete physical activity for the last 30 minutes while parents an received extra educational session.

45  
46  
47

**TAILORING**

9. If the intervention was planned to be personalised, titrated or adapted, then describe what, why, when, and how.

All families received the same intervention.

**MODIFICATIONS**

10.† If the intervention was modified during the course of the study, describe the changes (what, why, when, and how).

Two sites delivered the pilot programme to their respective communities. Site A decided to separate children and parents from the start of the group sessions because they felt children of this age would not gain anything nor

1 were likely to understand the educational sessions. Children received a full  
 2 physical activity session instead while parents received the educational  
 3 session alone.  
 4

5 Owing to low numbers attending the programme in Site B programme staff  
 6 chose not to go ahead with the final assessment at 12 months and instead  
 7 conducted the final assessments during the third booster session.  
 8

9  
 10 **HOW WELL**

- |    |                |                                                                                                                                                                                       |                                                                                                                                                                  |
|----|----------------|---------------------------------------------------------------------------------------------------------------------------------------------------------------------------------------|------------------------------------------------------------------------------------------------------------------------------------------------------------------|
| 11 | 12 <b>11.</b>  | 13 Planned: If intervention adherence or fidelity was assessed, describe<br>14 how and by whom, and if any strategies were used to maintain or<br>15 improve fidelity, describe them. | 16 Fidelity of intervention delivery was assessed using trainer self-reports and<br>17 exit interviews.                                                          |
| 18 | 19 <b>12.†</b> | 20 Actual: If intervention adherence or fidelity was assessed, describe the<br>21 extent to which the intervention was delivered as planned.                                          | 22 In Site A, the programme was delivered in a more interactive manner (i.e.<br>23 without the use of programme slides). Site B followed the manuals as planned. |

24 \*\* **Authors** - use N/A if an item is not applicable for the intervention being described. **Reviewers** – use ‘?’ if information about the element is not reported/not sufficiently reported.

25 † If the information is not provided in the primary paper, give details of where this information is available. This may include locations such as a published protocol or other published  
 26 papers (provide citation details) or a website (provide the URL).

27 ‡ If completing the TIDieR checklist for a protocol, these items are not relevant to the protocol and cannot be described until the study is complete.

28 \* We strongly recommend using this checklist in conjunction with the TIDieR guide (see *BMJ* 2014;348:g1687) which contains an explanation and elaboration for each item.

29  
 30 \* The focus of TIDieR is on reporting details of the intervention elements (and where relevant, comparison elements) of a study. Other elements and methodological features of studies are  
 31 covered by other reporting statements and checklists and have not been duplicated as part of the TIDieR checklist. When a **randomised trial** is being reported, the TIDieR checklist should be  
 32 used in conjunction with the CONSORT statement (see [www.consort-statement.org](http://www.consort-statement.org)) as an extension of **Item 5 of the CONSORT 2010 Statement**. When a **clinical trial protocol** is being  
 33 reported, the TIDieR checklist should be used in conjunction with the SPIRIT statement as an extension of **Item 11 of the SPIRIT 2013 Statement** (see [www.spirit-statement.org](http://www.spirit-statement.org)). For  
 34 alternate study designs, TIDieR can be used in conjunction with the appropriate checklist for that study design (see [www.equator-network.org](http://www.equator-network.org)).  
 35  
 36  
 37  
 38  
 39  
 40  
 41  
 42  
 43  
 44  
 45  
 46  
 47

## COREQ Checklist for Qualitative Research:

| No. Item                                       | Guide questions/description                                                                                                                              | Reported on Page # |
|------------------------------------------------|----------------------------------------------------------------------------------------------------------------------------------------------------------|--------------------|
| <b>Domain 1: Research team and reflexivity</b> |                                                                                                                                                          |                    |
| <i>Personal Characteristics</i>                |                                                                                                                                                          |                    |
| 1. Interviewer/facilitator                     | Which author/s conducted the interview or focus group?                                                                                                   | Pg. 6              |
| 2. Credentials                                 | What were the researcher's credentials? E.g. PhD, MD                                                                                                     | Pg. 1, 6 & 7       |
| 3. Occupation                                  | What was their occupation at the time of the study?                                                                                                      | Pg. 1, 6           |
| 4. Gender                                      | Was the researcher male or female?                                                                                                                       | Pg. 1,6            |
| 5. Experience and training                     | What experience or training did the researcher have?                                                                                                     | Pg. 6              |
| <i>Relationship with participants</i>          |                                                                                                                                                          |                    |
| 6. Relationship established                    | Was a relationship established prior to study commencement?                                                                                              | Pg. 3              |
| 7. Participant knowledge of the interviewer    | What did the participants know about the researcher? e.g. personal goals, reasons for doing the research                                                 | Pg. 15             |
| 8. Interviewer characteristics                 | What characteristics were reported about the interviewer/facilitator? e.g. Bias, assumptions, reasons and interests in the research topic                | Pg. 1,3,6          |
| <b>Domain 2: study design</b>                  |                                                                                                                                                          |                    |
| <i>Theoretical framework</i>                   |                                                                                                                                                          |                    |
| 9. Methodological orientation and Theory       | What methodological orientation was stated to underpin the study? e.g. grounded theory, discourse analysis, ethnography, phenomenology, content analysis | Pg. 6-7            |
| <i>Participant selection</i>                   |                                                                                                                                                          |                    |
| 10. Sampling                                   | How were participants selected? e.g. purposive, convenience, consecutive, snowball                                                                       | Pg. 6              |
| 11. Method of approach                         | How were participants approached? e.g. face-to-face, telephone, mail, email                                                                              | Pg. 6              |
| 12. Sample size                                | How many participants were in the study?                                                                                                                 | Pg. 7              |
| 13. Non-participation                          | How many people refused to participate or dropped out? Reasons?                                                                                          | Pg. 7              |
| <i>Setting</i>                                 |                                                                                                                                                          |                    |
| 14. Setting of data collection                 | Where was the data collected? e.g. home, clinic, workplace                                                                                               | Pg. 6              |
| 15. Presence of non-participants               | Was anyone else present besides the participants and researchers?                                                                                        | NA                 |
| 16. Description of sample                      | What are the important characteristics of the sample? e.g. demographic data, date                                                                        | Pg. 7              |
| <i>Data collection</i>                         |                                                                                                                                                          |                    |

|                                        |                                                                                                                                 |                                                  |
|----------------------------------------|---------------------------------------------------------------------------------------------------------------------------------|--------------------------------------------------|
| 17. Interview guide                    | Were questions, prompts, guides provided by the authors? Was it pilot tested?                                                   | Pg. 6                                            |
| 18. Repeat interviews                  | Were repeat interviews carried out? If yes, how many?                                                                           | NA                                               |
| 19. Audio/visual recording             | Did the research use audio or visual recording to collect the data?                                                             | Pg. 6                                            |
| 20. Field notes                        | Were field notes made during and/or after the interview or focus group?                                                         | Yes                                              |
| 21. Duration                           | What was the duration of the interviews or focus group?                                                                         | Pg. 6                                            |
| 22. Data saturation                    | Was data saturation discussed?                                                                                                  | Pg. 6                                            |
| 23. Transcripts returned               | Were transcripts returned to participants for comment and/or correction?                                                        | No                                               |
| <b>Domain 3: analysis and findings</b> |                                                                                                                                 |                                                  |
| <i>Data analysis</i>                   |                                                                                                                                 |                                                  |
| 24. Number of data coders              | How many data coders coded the data?                                                                                            | Pg. 7                                            |
| 25. Description of the coding tree     | Did authors provide a description of the coding tree?                                                                           | N/A                                              |
| 26. Derivation of themes               | Were themes identified in advance or derived from the data?                                                                     | Pg. 7                                            |
| 27. Software                           | What software, if applicable, was used to manage the data?                                                                      | Pg. 7                                            |
| 28. Participant checking               | Did participants provide feedback on the findings?                                                                              | NA                                               |
| <i>Reporting</i>                       |                                                                                                                                 |                                                  |
| 29. Quotations presented               | Were participant quotations presented to illustrate the themes/findings? Was each quotation identified? e.g. participant number | Pg. 8-13                                         |
| 30. Data and findings consistent       | Was there consistency between the data presented and the findings?                                                              | Pg. 8-13                                         |
| 31. Clarity of major themes            | Were major themes clearly presented in the findings?                                                                            | Pg. 8-13                                         |
| 32. Clarity of minor themes            | Is there a description of diverse cases or discussion of minor themes?                                                          | Discussion of major and minor themes<br>Pg. 8-13 |

# BMJ Open

## Barriers and facilitators to the implementation of a community-based, multidisciplinary, family-focused childhood weight management programme in Ireland: A qualitative study

|                                 |                                                                                                                                                                                                                                                                                                                                                                          |
|---------------------------------|--------------------------------------------------------------------------------------------------------------------------------------------------------------------------------------------------------------------------------------------------------------------------------------------------------------------------------------------------------------------------|
| Journal:                        | <i>BMJ Open</i>                                                                                                                                                                                                                                                                                                                                                          |
| Manuscript ID                   | bmjopen-2017-016459.R2                                                                                                                                                                                                                                                                                                                                                   |
| Article Type:                   | Research                                                                                                                                                                                                                                                                                                                                                                 |
| Date Submitted by the Author:   | 14-Jun-2017                                                                                                                                                                                                                                                                                                                                                              |
| Complete List of Authors:       | Kelleher, Emily; University College Cork, Epidemiology and Public Health Harrington, Janas; University College Cork, Epidemiology and Public Health Shiely, Frances; University College Cork, Epidemiology and Public Health Perry, Ivan; University College Cork, Epidemiology and Public Health Mc Hugh, Sheena; University College Cork, Epidemiology & Public Health |
| <b>Primary Subject Heading</b>: | Paediatrics                                                                                                                                                                                                                                                                                                                                                              |
| Secondary Subject Heading:      | Qualitative research, Health services research, Public health                                                                                                                                                                                                                                                                                                            |
| Keywords:                       | Implementation, barriers, facilitators, childhood, obesity, community                                                                                                                                                                                                                                                                                                    |
|                                 |                                                                                                                                                                                                                                                                                                                                                                          |

SCHOLARONE™  
Manuscripts

1  
2  
3 Title:  
4

5 Barriers and facilitators to the implementation of a community-based, multidisciplinary, family-focused  
6 childhood weight management programme in Ireland: A qualitative study  
7  
8

9  
10 Corresponding Author:  
11

12 Emily Kelleher, MPH BSc, Department of Epidemiology and Public Health, 4<sup>th</sup> Floor, Western Gateway Building,  
13 University College Cork, Ireland. Email: [emily.kelleher@ucc.ie](mailto:emily.kelleher@ucc.ie) Tel: 00353 (21) 4205517  
14  
15

16  
17 Authors:  
18

19 Emily Kelleher, Department of Epidemiology and Public Health, University College Cork, Ireland  
20  
21

22 Janas M Harrington, Department of Epidemiology and Public Health, University College Cork, Ireland  
23  
24

25 Frances Shiely, Department of Epidemiology and Public Health, University College Cork and HRB Clinical  
26 Research Facility, Mercy University Hospital, Grenville Place, Cork, Ireland  
27  
28

29 Ivan J Perry, Department of Epidemiology and Public Health, University College Cork, Ireland  
30  
31

32 Sheena M McHugh, Department of Epidemiology and Public Health, University College Cork, Ireland  
33  
34

35 Keywords:  
36

37 Implementation; barriers; facilitators; childhood; obesity; community; treatment  
38  
39  
40  
41  
42  
43  
44  
45  
46  
47  
48  
49  
50  
51  
52  
53  
54  
55  
56  
57  
58  
59  
60

**ABSTRACT:**

**Objective:** To explore the barriers and facilitators experienced by those implementing a government-funded, community-based, childhood weight management programme.

**Design:** Qualitative using semi-structured interviews.

**Setting:** Two geographical regions in the south and west of the Republic of Ireland.

**Participants:** 29 national and local level stakeholders responsible for implementing the programme including professionals from dietetics, psychology, public health nursing, physiotherapy, health promotion and administration.

**Methods:** Framework analysis was used to identify barriers and facilitators which were mapped onto six levels of factors influencing implementation outlined by Grol and Wensing: the innovation, the individual professional, the patient, the social context, the organisational context, and the external environment.

**Results:** Most barriers occurred at the level of the organisational context. For all stakeholders, barriers arose due to the multidisciplinary nature of the programme, including the lack of role clarity and added complexity of working in different locations. Health professionals' low-perceived self-efficacy in approaching the subject of weight with parents and parental resistance to hearing about their child's weight status were barriers to programme implementation at the individual professional and patient levels, respectively. The main facilitators of implementation, occurring at the level of the health professional, included stakeholders' recognition of the need for a weight management programme and personal interest in the area of childhood obesity. Having a local lead and supportive colleagues were further implementation drivers.

**Conclusions:** This study highlights the complexities associated with implementing a multidisciplinary childhood weight management programme, particularly translating such programmes to a community setting. Our results suggest the assignment of clear roles and responsibilities, the provision of sufficient practical training and resources, and organisational support play pivotal roles in overcoming barriers to change. This evidence can be used to develop an implementation plan to support the translation of interventions into real world settings.



**KEYWORDS:**

Implementation; barriers; facilitators; childhood; obesity; community

**ARTICLE SUMMARY****Strengths and limitations**

- This is one of few qualitative studies, and the first in Ireland, that explored the factors that hampered and facilitated the implementation of a community-based, multi-component childhood weight management programme from a wide range of stakeholder perspectives.
- While interviewing a wide range of stakeholders provided a thorough overview of the relevant issues, the themes that emerged were relatively homogenous across disciplines which added to the authority of the findings.
- Data were analysed using a systematic approach and an adapted version of the implementation model by Grol and Wensing was used to classify the barriers and facilitators into levels.
- Using a preconceived framework runs the risk of prematurely excluding other ways of organising the data. However, data was analysed inductively first before mapping onto the Grol and Wensing Framework.

**BACKGROUND:**

Childhood obesity is a worldwide public health concern and there is now widespread agreement that the complex aetiology of the issue requires a multifaceted approach to treatment [1-3]. International recommendations agree that initiatives to reduce and manage childhood obesity should be family-focused and combine healthy eating, physical activity and behavioural components [2, 4, 5]. In 2016, the World Health Organisation published their report of the commission on ending childhood obesity within which they echo these recommendations but also add that they should be delivered by *“multi-professional teams with appropriate training and resources”* [5]pg.11. These recommendations, however, have been largely based on small-scale studies conducted in controlled settings with specialised staff, thus limiting their applicability and generalizability to ‘real-world’ settings such as communities or hospitals [2].

1  
2  
3 In public health, once interventions have undergone innovation testing and demonstrated efficacy the next  
4 steps include replication and 'scale-up' to larger populations in 'real-world' settings [6]. There are relatively  
5 few examples of published studies reporting on the pragmatic application of effective childhood obesity  
6 treatment programmes [7, 8]. While implementation issues such as engagement, local context, staffing and  
7 funding are likely to be common across many public health interventions [8], little is documented about the  
8 experience of those implementing childhood weight management programmes and even fewer studies detail  
9 the factors influencing implementation [9]. For example, a lack of providers trained in evidence-based care for  
10 childhood obesity was listed by delegates attending a recent conference in the United States as a major barrier  
11 to treatment implementation [3]. Furthermore, with the majority of families declining referral and up to 75%  
12 of families discontinuing care, poor engagement with families has proven to be a significant challenge facing  
13 teams tasked with implementing such programmes [10, 11].  
14  
15  
16  
17  
18  
19  
20  
21  
22  
23

24  
25 When introduced under less-controlled conditions, insight into the factors influencing implementation is  
26 crucial. Therefore, the aim of this study was to explore and categorise the barriers and facilitators experienced  
27 by those implementing a government-funded, community-based, multi-component childhood weight  
28 management pilot programme to inform their eventual scale up.  
29  
30  
31  
32

## 33 **METHODS:**

### 34 **Intervention and context**

35  
36  
37 Although trends appear to be stabilising in Ireland, prevalence of childhood obesity remains high [12].  
38 Currently, in Ireland, almost one in four children are either overweight or obese [13] and there is no  
39 standardised community-based weight management programme available to those children with obesity.  
40 Community programmes are usually provided on an ad-hoc basis and are rarely evaluated or sustained. In an  
41 attempt to identify a universal treatment the Irish Health Service Executive (HSE) planned to pilot the *W82GO-*  
42 *community* programme in two communities. This programme had previously demonstrated effectiveness in  
43 the hospital setting [14]. Its effectiveness in the community setting was to be assessed with the intention of  
44 nationwide rollout should the programme demonstrate a positive impact on body mass index (BMI). The  
45 Template for Intervention Description and Replication (TIDieR) checklist [15] was used to specify the details of  
46 programme delivery and is included in Supplementary file 1.  
47  
48  
49  
50  
51  
52  
53  
54  
55  
56  
57  
58  
59  
60

1  
2  
3 In summary, *W82GO* aims to improve nutrition, increase physical activity and facilitate behaviour change over  
4 one year [14]. It was designed as a hospital-based, family-focused, multidisciplinary programme grounded in  
5 behavioural change theory and was modelled on best practice recommendations [2, 5, 16]. The primary goal  
6 was a reduction in Body Mass Index Standard Deviation Score and has previously been found to be effective  
7 when delivered in a hospital out-patient setting [14].  
8  
9

10  
11  
12 The *W82GO* programme involves an initial individual assessment to ascertain family eligibility followed by two  
13 phases. Families were eligible for the programme if the child was between 5-7 years old; was obese (BMI  
14  $\geq 98$ th centile); had no limitations to engaging in physical activity; was not taking medication known to affect  
15 body weight; and had at least one parent/carer who was able to attend each of the programme sessions.  
16 Siblings were also welcome to attend the sessions. Phase 1 involved an initial intensive phase consisting of six  
17 weekly group sessions for both the child and his/her parent/carer. These sessions lasted approximately one  
18 and a half to two hours and incorporated educational and practical sessions to increase physical activity,  
19 improve nutrition and increase sleep. Upon completion of phase 1, children returned with their parents/care-  
20 givers for three booster group sessions at three, six and nine months. These sessions aimed to encourage the  
21 family to continue with lifestyle change and to manage any barriers to change. Finally, at 12 months, the  
22 children and their parents/care-givers returned for a final individual assessment to document any changes and  
23 make plans for sustainment.  
24  
25  
26  
27  
28  
29  
30  
31  
32  
33  
34  
35  
36

37 For the current study, *W82GO* was adapted and implemented in two community sites (Site A and Site B) from  
38 April 2015 for 12 months and subsequently renamed *W82GO-community*. Both sites were chosen as they were  
39 part of a national pilot growth measurement programme and included a mix of rural and urban towns in the  
40 west and south of Ireland. Initial assessments took place in community healthcare offices while subsequent  
41 group sessions were delivered on weekdays in the afternoon at a local sports or community centre. The  
42 programme was offered free of charge and was delivered by existing community health professionals including  
43 dietitians, psychologists, public health nurses, physiotherapists, health promotion officers, area medical  
44 officers and administrators. These health professionals were brought together as a team and asked to deliver  
45 this programme as part of their existing roles. Table 1 outlines their specific responsibilities during programme  
46 implementation. All staff were invited to take part in a training programme prior to programme  
47 commencement. Training included a needs assessment, a one day educational training course and two days of  
48  
49  
50  
51  
52  
53  
54  
55  
56  
57  
58  
59  
60

clinical shadowing with an experienced *W82GO* programme practitioner at the National Children's University Hospital where it was developed. Each community practitioner was supplied with a user manual which outlined the programme and detailed the content for both phases.

**Table 1 Health professional roles during the implementation of *W82GO*-community**

| Health Professional             | Role in implementation of <i>W82GO</i> -community                                                                                        |
|---------------------------------|------------------------------------------------------------------------------------------------------------------------------------------|
| National Manager (n=1)          | Overseeing implementation of <i>W82GO</i> -community in both community sites                                                             |
| Local Manager (n=2)             | Overseeing implementation of <i>W82GO</i> -community at local level. Local manager in Site B was involved in referring to the programme. |
| Physiotherapists (n=4)          | Involved in initial assessments and delivering programme material                                                                        |
| Dietitians (n=5)                | Involved in initial assessments and delivering programme material                                                                        |
| Psychologists (n=3)             | Involved in initial assessments and delivering programme material                                                                        |
| Public Health Nurses (n=13)     | Referral to the programme                                                                                                                |
| Area Medical Officers (n=4)     | Involved in initial assessments                                                                                                          |
| Health Promotion Officers (n=4) | Delivering programme material                                                                                                            |
| Administration (n=2)            | Involved in contacting parents re programme sessions                                                                                     |

### Study design and sample

A qualitative approach using semi-structured interviews was utilised. We adopted a purposive approach to sampling, inviting stakeholders with knowledge and experience of planning, coordinating or delivering *W82GO*-community. To ensure representation from each stakeholder group and given the small number of individuals in each, we invited all stakeholders to participate (n=38, see table 1). All stakeholders were contacted by email in the first instance and followed up by telephone contact during which the researcher outlined the study aims and methodology.

### Data collection

All participants were invited to take part in face-to-face interviews. However, due to time and scheduling difficulties a mixture of telephone and face-to-face interviews were conducted between August 2015 and February 2016 (during programme implementation). To ensure consistency all interviews were conducted by a single trained qualitative researcher (EK), using a semi structured topic guide. Participants knew the interviewer as an independent programme evaluator conducting this research as part of her PhD training. The topic guide was developed based on relevant literature and focused on seven issues: (1) awareness of the

1  
2  
3 issue of childhood obesity and existing healthy lifestyle programmes, (2) perceived value of and interest in  
4 community evidence-based treatment programmes, (3) communication of the *W82GO-community* pilot  
5 programme; (4) specific role in implementing *W82GO-community*; (5) barriers and enablers to  
6 implementation; (6) perceived successes and challenges experienced and finally (7) recommendations for the  
7 future roll-out of childhood weight management programmes in Irish communities. Core topics were the same  
8 across stakeholders and particular probes were added for specific stakeholder groups depending on their role  
9 during the programme. For example public health nurses were specifically asked to report on the barriers and  
10 facilitators to referral. Prompts and probes were used throughout the interviews to stimulate discussion. Prior  
11 to each interview, participants were informed about the purpose of the study, that participation was voluntary  
12 and that they could terminate the interview at any stage for any reason. Signed informed consent was  
13 obtained before each interview, which lasted on average 45 minutes. Interviews were digitally recorded and  
14 transcribed verbatim. Data collection and analysis was iterative. Data saturation was judged to have been  
15 reached between interviews 20 and 25. However during recruitment, other stakeholders had expressed an  
16 interest in sharing their experience and so were given the opportunity to participate. The data from these  
17 interviews overlapped with the existing coding framework and thus contributed to the main themes. Ethical  
18 approval was granted by the Clinical Research Ethics Committee of the Cork Teaching Hospitals.

### 34 35 **Data Analysis**

36  
37 Framework analysis was used to analyse the data [17]. This approach enabled the investigation of a priori  
38 objectives while also allowing new themes to emerge from the data. One researcher (EK) transcribed and  
39 coded each transcript while another (SMH) undertook initial coding of a selection of transcripts. Similarities  
40 and differences between the coding labels and definitions were discussed and the coding framework was  
41 refined and applied to the remaining interviews. While this process was conducted at an early stage of the  
42 analysis, the coding process was iterative; emergent codes were added to the framework and contributed to  
43 the development of themes across the interviews. Codes were synthesised and grouped according to the  
44 dominant emergent themes. Themes were also analysed across stakeholder groups to identify similarities and  
45 differences across disciplines and positions. These themes were mapped onto a framework developed by Grol  
46 and Wensing (2004) which specifies six levels of factors that facilitate or impede implementation success: the  
47 innovation; the individual professional, the patient; the social context; the organisational context; and the  
48  
49  
50  
51  
52  
53  
54  
55  
56  
57  
58  
59  
60

economic and political environment [18]. Mapping emergent themes to the framework at this stage of the analysis ensured that we did not impose a predefined structure or terminology on participants' accounts. This well-established framework (Table 2) was chosen because it describes how barriers and facilitators can be identified, categorised, and used for the development of tailor-based implementation strategies to facilitate desired change [18], in this instance implementing the *W82GO-community* programme. Discrepancies on the mapping of themes were discussed until consensus was reached. NVivo (QSR v10) was used to manage data analysis.

**Table 2 Barriers to and incentives for change at different levels of healthcare<sup>a</sup>**

| Level                          | Barriers / Incentives                                                           |
|--------------------------------|---------------------------------------------------------------------------------|
| Innovation                     | Advantages in practice, feasibility, credibility, attractiveness, accessibility |
| Individual Practitioner        | Awareness, knowledge, attitude, motivation to change, behavioural routines      |
| Patient                        | Knowledge, skills, attitude, compliance                                         |
| Social Context                 | Opinion of colleagues, culture of the network, collaboration, leadership        |
| Organisational Context         | Organisation of care processes, staff, capacities, resources, structures        |
| Economic and Political Context | Financial arrangements, regulations, policies                                   |

<sup>a</sup>*Grol and Wensing's multilevel model*[18]

## RESULTS

### Stakeholder Characteristics

We contacted 38 stakeholders and recruited 29 interviewees (7 face-to-face, 22 telephone) from a range of disciplines and professions, yielding a response rate of 76% (Table 3).

**Table 3 Stakeholder characteristics**

|                           | Site A | Site B | National | Total |
|---------------------------|--------|--------|----------|-------|
| National Manager          | NA     | NA     | 1        | 1     |
| Local Manager             | 1      | 1      | x        | 2     |
| Physiotherapists          | 2      | 1      | 1        | 4     |
| Dietitians                | 3      | x      | x        | 3     |
| Psychologists             | 1      | 1      | x        | 2     |
| Public Health Nurses      | 6      | 3      | x        | 9     |
| Area Medical Officers     | x      | 2      | x        | 2     |
| Health Promotion Officers | 3      | 1      | x        | 4     |
| Administration            | 1      | x      | 1        | 2     |
| Total                     | 17     | 9      | 3        | 29    |

## Barriers and Facilitators

For all participants, barriers arose due to the multidisciplinary nature of the programme, including the lack of understanding of other disciplines, lack of role clarity as well as the added complexities of working in different locations. Participants' recognition of the need for a childhood obesity programme and their own personal interest in the area were the main drivers of implementation while the presence of a local lead and supportive colleagues were further enabling factors. Views on the main barriers and facilitators to implementation were consistent across stakeholders; despite different disciplinary backgrounds, they had common experiences as implementers adding to the authority of the findings. Table 4 presents the perceived barriers and facilitators from the perspective of the stakeholders mapped onto the six implementation levels with quotations to illustrate each level.

**Table 4 Perceived Barriers and Facilitators to the Implementation of W82GO in the Community**

| Levels                                                                 | Quotations to illustrate the identified levels                                                                                                                                                                                                                                                                                                                                                                                                               |
|------------------------------------------------------------------------|--------------------------------------------------------------------------------------------------------------------------------------------------------------------------------------------------------------------------------------------------------------------------------------------------------------------------------------------------------------------------------------------------------------------------------------------------------------|
| <b>The Innovation</b>                                                  |                                                                                                                                                                                                                                                                                                                                                                                                                                                              |
| Credibility                                                            | (+) <i>"I suppose because it was attached to an acute hospital and because there was a consultant paediatrician and you had a lot of disciplines and a lot of very competent professionals involved, and that it had been successful when delivered there. That was the main reason I believed in the programme I suppose", W82GO003</i>                                                                                                                     |
| Attractiveness (i.e. Multidisciplinary nature)                         | (+) <i>"I do think the MDT approach was superb. I think that is you're going to do something for a child who is obese then you need it." W82GO018</i>                                                                                                                                                                                                                                                                                                        |
| Transferability (i.e. different population, different resource issues) | (-) <i>"You are talking about a different cohort of families. Families who are already in the system. They are used to going in for appointments. You're talking about a group who've already had difficulties identified by their GP or whoever so by the time they are going for the group they are already sold, they are used to it and they are used to that sort of setting which is very kind of fast and quick-paced and very focused", W82GO002</i> |
| Relevance (e.g. too medicalised)                                       | (-) <i>"I think the area medical officer, the medical input I think is probably optional or at least part-time. It's of less importance. It medicalised this community programme a bit too much", W82GO021</i>                                                                                                                                                                                                                                               |
| <b>The Individual Professional</b>                                     |                                                                                                                                                                                                                                                                                                                                                                                                                                                              |
| Awareness of the problem / Recognition of need                         | (+) <i>"It is a problem, most definitely. I think it's a time bomb that went off over the past 10 years and that we are behind it. Way behind it and the sooner we get going and get doing something the better", W82GO013</i>                                                                                                                                                                                                                               |
| Personal interest and motivation                                       | (+) <i>"So that enthusiasm and that dedication made it happen, it was key to its success", W82GO011</i>                                                                                                                                                                                                                                                                                                                                                      |
| Low self-efficacy                                                      | (-) <i>"I wouldn't be especially skilled in assessing children you know with obesity and that kind of thing... Or talking to parents about it... I was concerned about my own ability to, to get up to speed fairly quickly", W82GO015</i>                                                                                                                                                                                                                   |

|                                                       |                                                                                                                                                                                                                                                                                                                                                                                                                                                                                                                                                                                                                                                                                                                                                                                                         |
|-------------------------------------------------------|---------------------------------------------------------------------------------------------------------------------------------------------------------------------------------------------------------------------------------------------------------------------------------------------------------------------------------------------------------------------------------------------------------------------------------------------------------------------------------------------------------------------------------------------------------------------------------------------------------------------------------------------------------------------------------------------------------------------------------------------------------------------------------------------------------|
| Attitudes (i.e. Multidisciplinary perspectives)       | (-) "I suppose the other main challenge was the multidisciplinary nature of the programme. I think the challenges of it is when you put together a team obviously from all different backgrounds not with different agendas but with different experiences and knowledge and different perspectives", W82GO026                                                                                                                                                                                                                                                                                                                                                                                                                                                                                          |
| <b>The Patient</b>                                    |                                                                                                                                                                                                                                                                                                                                                                                                                                                                                                                                                                                                                                                                                                                                                                                                         |
| Parental Resistance (weight misperception and denial) | (-) "I think there was a denial that there was anything wrong with their child, or that their child was overweight. There was a total denial about that because the population in general look like their child. Their child may be a little bit above of what the normal population looks like, but they didn't see that as an issue at all", W82GO028                                                                                                                                                                                                                                                                                                                                                                                                                                                 |
| <b>The Social Context</b>                             |                                                                                                                                                                                                                                                                                                                                                                                                                                                                                                                                                                                                                                                                                                                                                                                                         |
| Supportive colleagues                                 | (+) "Once she came on board there was two of us, it was a lot easier to share the workload and if I couldn't be there for a day she could be there for it so I suppose that definitely took the load off and she also acted as a sounding board you know? If there was something I wasn't sure of I could say what do you think about this and vice-versa, you know what I mean?", W82GO016                                                                                                                                                                                                                                                                                                                                                                                                             |
| Leadership                                            | (+) "I mean if we didn't have her pulling all those people and bits together it wouldn't have worked. She did a great job in I think the co-ordination role cause I think running something like this with people dispersed across a whole county and city then you need a project manager on the ground.", W82GO017                                                                                                                                                                                                                                                                                                                                                                                                                                                                                    |
| Collaboration between national and local teams        | (-) "I did feel there was a very big gap once the decision had been made nationally to roll this out, there was a very big gap then us on the ground and them, there was no consultation or collaboration with people on the ground and I think that's where the problem was", W82GO003                                                                                                                                                                                                                                                                                                                                                                                                                                                                                                                 |
| <b>The Organisational Context</b>                     |                                                                                                                                                                                                                                                                                                                                                                                                                                                                                                                                                                                                                                                                                                                                                                                                         |
| MDT Structure (logistics)                             | (-) "I suppose one of the challenges definitely is that the health professionals are all in different places", W82GO004                                                                                                                                                                                                                                                                                                                                                                                                                                                                                                                                                                                                                                                                                 |
| Resources                                             | (-) "I guess time constraints 'cause a lot of people were pressurised for time. Like even ourselves we wouldn't have been able to go to every session and I would have liked to have gone but we just couldn't. We didn't have the time. We didn't have the staff to be able to attend so i think time and resource pressures were the main concerns", W82GO013                                                                                                                                                                                                                                                                                                                                                                                                                                         |
| Training                                              | (-) "It (the training) was as if they were trying to sell us the programme when you know we were already there. We were already sold. I mean we knew why it was important... because of the obesity issue so there was no need to go over all that again. They should have just focused on how to actually implement and deliver the programme", W82GO011                                                                                                                                                                                                                                                                                                                                                                                                                                               |
| <b>External Environment</b>                           |                                                                                                                                                                                                                                                                                                                                                                                                                                                                                                                                                                                                                                                                                                                                                                                                         |
| Lack of existing services                             | (+) "There is nothing out there so that's where it was great to have something like W82GO. That if you did see a child that you know there was something. Some sort of pathway"                                                                                                                                                                                                                                                                                                                                                                                                                                                                                                                                                                                                                         |
| Media                                                 | (+) "There was a huge media campaign ongoing around the time we were implementing the programme which got some parents thinking and talking. I mean those things do have a big impact. Things like Operation Transformation that's aired in January have a huge impact. I think we need more media on the impact of childhood obesity and not just the long-term impacts", W82GO003<br><br>(-) "I think maybe it's (obesity) hyped up a little bit in the media. I think maybe that in itself could be making things difficult for parents to come forward. We don't have any other disease related issue hyped up as much you know? If you had a child with obesity you would be feeling a small bit cringe like. You'd be wanting to find somewhere private to get some help like you know", W82GO020 |
| Stigma                                                | (-) "Wouldn't have their child come to a programme in case they'd be labelled overweight or obese. There is a stigma and just from hearing again I wasn't in the parents room, but just from hearing other colleagues feedback it's the parents fear of feeling judged and                                                                                                                                                                                                                                                                                                                                                                                                                                                                                                                              |



|  |                          |
|--|--------------------------|
|  | <i>blamed</i> ",W82GO002 |
|--|--------------------------|

(+) Facilitators, (-) Barriers.

### The Innovation

In terms of the *W82GO-community* pilot programme (innovation), while stakeholders believed it came from a credible source having been developed by one of the national children's hospitals in Ireland, many had doubts over its accessibility and about how well it would transfer to the community setting. This uncertainty resulted in feelings of unease and community practitioners were hesitant to get involved initially. One stakeholder explained how she worried at length about what impact the programme would have on existing services and how feasible it was to run in the community; *"The setting is different. We were taking a programme that was from an acute setting into the community - that possibly was where the breakdown happened because you didn't have the same services. You didn't have people on site. There was travel, there was all these other logistics that weren't thought about when they were moving an acute programme to the community"*, W82GO021. In particular, stakeholders believed they were dealing with a very different cohort of families than the hospital-based programme as described by the following quote; *"You've a very different kind of child coming into the hospital than you do in the general community. You've a very different kind of parent. Even if you had a parent who was resistant to hearing about their child being overweight, if they are attending hospital appointments regularly they are obviously already engaged about their child's health... so I believe that's a major barrier straight away that they possibly didn't have to face in the hospital you know?"*, W82GO010.

In addition to the differences in the target group, stakeholders believed the programme was too medicalised for the community setting and some felt it did not fit with their perception of a healthy lifestyle programme. This was due to the number of health professionals involved and in particular, the involvement of medical staff. Furthermore, many stakeholders thought the collection of clinical markers of disease and medical history during the initial assessments was unnecessary. As one stakeholder described; *"the initial assessments were totally irrelevant. I mean when I heard that bloods were being taken I thought oh for God sake. You know we were supposed to be running a community-based education intervention where the focus should be on changing lifestyles. It's not our job to be diagnosing other problems"*, W82GO005.

### Individual Professional

While stakeholders both applauded and recognised the need for a multidisciplinary approach to the treatment of childhood obesity, it created significant barriers to programme implementation. The variety of community health professionals involved in the implementation of *W82GO-community* with differing perspectives and priorities led to role uncertainty and in some cases a perception of disrespect between disciplines. One stakeholder captures this theme in the following quote; *"I suppose the other main challenge was the multidisciplinary nature of the programme. I think the challenge is when you put together a team obviously from all different backgrounds not with different agendas but with different experiences and knowledge and different perspectives"*, W82GO026. Stakeholders described how *"there was quite a lack of understanding of the various discipline roles and responsibilities and some were even unsure of what some disciplines did"*, W82GO012. This lack of understanding sometimes resulted in tension between disciplines and created a challenging environment to work in. Others recalled feeling concerned about where they fit into the programme and believed a structured programme plan outlining specific roles and responsibilities was lacking.

Another key barrier that emerged at the level of the individual professional was their low perceived self-efficacy in dealing with childhood obesity and/or working with this young age group. In particular, many stakeholders reported their fear of approaching the subject with parents given the risk of upsetting them or *"rocking the boat"*. One stakeholder reported that *"it's something you want to do something about but it can be very difficult to approach the subject with parents. It's a very sensitive issue"*, W82GO001. In our study, stakeholders in Site A received motivational interviewing workshops for childhood obesity. This training equipped these stakeholders with increased skills and confidence in working with families on weight management issues. As one stakeholder described, post motivational interviewing training she wasn't *"frightened of dealing with them [parents] at all", It's kind of second nature to me now... I know the buzz words, I know exactly what to say to them. And body language, the whole lot"*, W82GO002. Others felt it was quite *"alien"* to work with children aged 5-6 years and believed they had not the appropriate training to do so.

Despite these barriers, all stakeholders were aware that childhood obesity was an issue in their respective communities and recognised the urgent need for treatment; *"Yeah I think it's a time bomb that went off over*

1  
2  
3 *the past ten years and that we are behind it, way behind and the sooner we get going and doing whatever we*  
4 *can the better”, W82GO012. Furthermore, stakeholders’ personal interest in tackling the issue, and their*  
5 *motivation and dedication to seeing the programme through were what many believed to be the main drivers*  
6 *behind programme completion; “It went ahead due to a lot of determination and not because it was easily*  
7 *implementable... if that’s a word”, W82GO014.*

### 13 **Patient**

14  
15  
16 Low programme uptake was a key issue during implementation. Many stakeholders believe that obesity has  
17 become the norm in society and as a result *“people don’t recognise overweight people as being in that actual*  
18 *overweight category because it’s become normal to be surrounded by overweight people”, W82GO021. In*  
19 *terms of the W82GO-community pilot programme, almost all stakeholders indicated that although children*  
20 *measured as obese on the growth charts their parents seemed unaware of any excess weight and once*  
21 *informed, many refused to accept that their child was obese. As a result of this misperception parents did not*  
22 *realise or accept the need for treatment. Speaking of her experience, one stakeholder described how “other*  
23 *parents just didn’t reply or didn’t get in touch because they believed everything was ok and there wasn’t a*  
24 *problem with their child. They didn’t need any programme. I think that definitely was a huge problem out there*  
25 *in the community setting”, W82GO012. Because of this low recognition amongst parents, many stakeholders*  
26 *recalled the resistance they faced when trying to discuss the issue with them and their fear prior to making*  
27 *contact with parents. One stakeholder explained how some parents would “be really angry so you’re taking*  
28 *angry phone calls in the evening. You know when you come in from a day’s work so it was really difficult”,*  
29 *W82GO002.*

### 44 **Social Context**

45  
46 Local level stakeholders believed there was a certain level of *“naïvety”* at national level about the reality of  
47 rolling out the pilot programme on the ground. They felt consultation during the planning stage was lacking  
48 and that national-level stakeholders had *“little experience of the practical aspects of childhood obesity”* as *“no*  
49 *one was actually working with obese children or even groups on a day to day basis”, W82GO004. As a result*  
50 *unrealistic expectations and timeframes prevailed, particularly during the recruitment phase. This led to*  
51 *frustration and confusion among local-level health professionals during implementation.*

1  
2  
3 Communication between national and local level stakeholders was considered poor. However, the presence of  
4 a local lead facilitated the exchange between staff on the ground and management at national level and was  
5 seen by almost all stakeholders as crucial for programme implementation. Furthermore, stakeholders felt that  
6 because of the multidisciplinary approach of the programme “*you needed someone on the ground*”; if they did  
7 not have a local lead “*pulling all those people and bits together, it wouldn't have worked because running*  
8 *something like this with people dispersed across a whole county and city is difficult*”, W82GO005. The presence  
9 of supportive colleagues and management were identified as further enabling factors.  
10  
11  
12  
13  
14  
15  
16

### 17 **Organisational Context**

18  
19 The multidisciplinary structure of the programme also created barriers at the organisational level. In addition  
20 to differing individual perspectives and priorities, the added complexities of working in different locations  
21 created difficulties during programme implementation. In many cases stakeholders didn't “*work at the same*  
22 *site... or even the same town which was a challenge*” as it “*took up a lot of time organising between schedules*  
23 *and travelling to meet and go through practicalities*”, W82GO007.  
24  
25  
26  
27  
28  
29

30 In addition to these challenges, at the organisational level, stakeholders reported that implementation was  
31 hampered due to insufficient resources (i.e. staff and time) and training. It was reported that two other  
32 proposed areas withdrew from the pilot programme because of the lack of staff and leadership on the ground  
33 to run the programme. Stakeholders felt that they had very different resource issues to the hospital-based  
34 teams who are “*within the confines of a hospital... so they would or should have the same vision or focus...*  
35 *whereas we can see now with a community based programme the professionals can be very different in their*  
36 *training, they can have a different ethos in the departments within their community. It's very individual. We*  
37 *have different line managers and different resources to deal with*”, W82GO011. Some stakeholders “*didn't*  
38 *want to get involved because of existing workloads*”, and the lack of extra resources or allocated time to  
39 implement the pilot. Furthermore, while acknowledging the little time hospital staff had to develop  
40 community-specific training, local-level stakeholders felt they needed more “*practical and tailored*”  
41 information. Many described the training they received as ‘*too general*’ and stated that “*it would have been*  
42 *very helpful to have had more practical tips on how to actually run the programme session to session with this*  
43 *age group*”, W82GO012.  
44  
45  
46  
47  
48  
49  
50  
51  
52  
53  
54  
55  
56  
57  
58  
59  
60

### External Environment

In the Grol and Wensing model, the 'economic and political context' refers to financial arrangements, regulations and policies - themes which did not emerge during our research. Therefore, the sixth level was renamed 'external environment' to include wider societal perspectives and determinants.

In terms of the external environment, the lack of existing services to treat and manage childhood obesity meant many stakeholders were excited to come on board and implement this new initiative. One stakeholder described *"waiting for years for something to happen in this area"*, W82GO005. The media was recognised as both a barrier and a facilitator to programme implementation. While stakeholders believed TV and radio campaigns have the potential to raise awareness they felt that the issue is *"also getting very bad press"* and being *"hyped up a little bit"* which in itself may make it more difficult for parents to come forward. Additionally, staff felt that the stigma surrounding childhood obesity and weight management programmes created a significant barrier to programme implementation as they believed many parents were reluctant to attend or even talk about the issue of weight for fear of singling out or *'labelling'* their child.

### Vision for the future

In terms of the future scale up of *W82GO-community*, the majority of stakeholders recommend establishing dedicated childhood obesity teams within the community, *"ideally people who are located at least in the same town"*, who can offer a range of interventions for different levels of need. One stakeholder described *"a tiered effect, for example there could be a level one which could be a generic workshop or talk that you could roll-out in lots of schools. A level two then would be a seminar for parents and level three would be a group programme. Level four then could be actual specific one on one interventions"*. Having a tiered approach would enable the team to match the level of need with the family and allow families to choose where on the scale they would best fit.

### DISCUSSION

This study identifies the barriers and facilitators to implementing a community-based weight management programme from the perspective of stakeholders tasked with delivering such a programme. While community-based weight management programmes have become an important response to the obesity epidemic given their potential reach and accessibility for families, the majority are based on small, efficacy trials [2] and little is

1  
2  
3 known about the factors influencing their implementation in real-world settings. Our findings suggest that  
4 more consideration is needed during the planning stages, including the creation of a structured programme  
5 plan outlining specific roles and responsibilities. Local-level stakeholders believe they should be involved in this  
6 process as they have practical experience of working with families on the ground in their respective  
7 communities. In addition to their experience, the stakeholders we interviewed are keen to get involved in  
8 community-based weight management treatment provided the appropriate training and resources have been  
9 allocated. Within their 10 year framework for action, the Irish Government recognise the need for additional  
10 resources to be assigned and seek to *“mobilise the health services to better prevent and address overweight  
11 and obesity through effective community-based health promotion programmes”*[19] as well as providing  
12 training and skills development. Given this renewed commitment by the Irish Department of Health to  
13 empower community teams and communities, the road ahead looks promising.  
14  
15

16  
17  
18  
19  
20  
21  
22  
23  
24  
25 A key barrier to the implementation of *W82GO-community* was perceived parental resistance which occurred  
26 at the patient level but is also intrinsically linked to the external environment where the increasing  
27 normalisation of overweight and obesity coexists with a stigma that surrounds the issue. Stakeholders  
28 delivering the programme described parental resistance occurring at every stage of the implementation  
29 process and suggested that parents did not appear to recognise the issue in their own children. As a result  
30 stakeholders believed that parents did not see the need for treatment or refused to accept that their child was  
31 carrying excess weight. While parental attitudes reported in this study were based on the perceptions of staff,  
32 a lack of parental awareness regarding their child’s weight and resistance towards discussing weight issues has  
33 been documented in previous research [20-24]. This may be due in part to the belief that obesity has become  
34 the norm in society, a point which was suggested by stakeholders in this study, and previously outlined in the  
35 literature [25]. It is also possible that parental resistance stems from the stigma that is associated with excess  
36 weight and obesity [8, 21-23] or the negative media attention obesity has received. The framing of coverage by  
37 media may affect people’s views about the causes of childhood obesity and the most appropriate strategies  
38 for addressing the problem [26]. Our findings highlight the need, at a policy level, for positive awareness-  
39 raising campaigns to encourage parental recognition of healthy childhood growth and development, in  
40 addition to knowledge regarding the importance of identifying obesity early in childhood.  
41  
42  
43  
44  
45  
46  
47  
48  
49  
50  
51  
52  
53  
54  
55  
56  
57  
58  
59  
60

1  
2  
3 Low perceived self-efficacy in approaching the subject of weight with parents was a barrier facing staff during  
4 implementation. Stakeholders in this study see the need for a childhood weight management programme in  
5 their communities and acknowledge their professional responsibility to get involved. However, they appear  
6 uncomfortable and unequipped to do this. This is consistent with previous research which found that low  
7 perceived skills and low perceived self-efficacy hamper the implementation of such programmes [20, 27-30]. In  
8 our study motivational interviewing workshops equipped stakeholders in Site A with increased skills and  
9 confidence in working with families on weight management issues. Motivational interviewing is a goal-  
10 orientated, patient-centred approach based on the use of communication skills to understand individuals'  
11 motivation for behaviour change [31] and has been found to be useful when applied in health care settings  
12 [32]. We therefore consider it important that healthcare professionals involved in the implementation of  
13 obesity programmes receive this training prior to programme commencement.  
14  
15  
16  
17  
18  
19  
20  
21  
22  
23

24  
25 The multidisciplinary structure of the programme emerged as both a barrier to and facilitator of  
26 implementation and spread across many of the levels outlined by Grol and Wensing. While acknowledged that  
27 it was required to treat such a complex health issue, it resulted in lack of role clarity, a lack of understanding of  
28 specific discipline roles, and led to difficulties in scheduling. This may in part be due to the structure and  
29 governance of community health services within Ireland. While there is a vision for multidisciplinary working  
30 set out in multiple policy documents and an emphasis on integrated care [33], the system is not set-up to  
31 support the concept. Stakeholders believe a simple roundtable introduction whereby practitioners could share  
32 their professional background and outline their specific role within the project would have helped overcome  
33 this ambiguity. They suggest it is a simple but often overlooked detail. Furthermore, stakeholders feel the  
34 establishment of a local lead was critical in assisting multidisciplinary working while also facilitating discussion  
35 between national and local level. Laws et al. also highlight the importance of having key local individuals  
36 responsible for driving and coordinating research translation [34].  
37  
38  
39  
40  
41  
42  
43  
44  
45  
46  
47  
48

49 Finally, an important finding from this research was the inherent problems in a '*one size fits all*' approach to  
50 community-based treatment. Stakeholders in our study suggest a tiered approach may be more suitable,  
51 beginning with a brief intervention which intensifies based on a child's degree of obesity, the family's  
52 motivation, and the capacity of the community and/or healthcare provider. This finding is in line with a  
53 suggestion from Staniford et al. who suggest that future interventions should tailor treatment according to  
54  
55  
56  
57  
58  
59  
60

1  
2  
3 participants' age, degree of obesity and their readiness or confidence to change [35]. In addition to tailoring a  
4  
5 programme to the individual, programmes need to be adapted for the community setting. Stakeholders in our  
6  
7 study raised concerns that the W82GO programme, having been developed in a hospital setting, was too  
8  
9 medicalised for community practice. In particular, the lengthy assessment process which in some cases  
10  
11 involved blood tests and the presence of medically trained doctors, was unnecessary for a community-based  
12  
13 lifestyle programme. This finding is consistent with previous research conducted by Watson et al. who  
14  
15 evaluated a family-based childhood obesity treatment intervention and found they needed to modify the  
16  
17 assessment process by replacing community paediatrician assessments with parent/carer self-completion forms  
18  
19 for reasons of time and cost [36]. To develop a full picture of treatment, future research should examine what  
20  
21 aspects of the programme work, for whom, in what context and why.

22  
23 While this study provides important insight into the implementation of childhood obesity programme in the  
24  
25 community, several limitations should be acknowledged. According to de Casterlé *et al.*, (2012) "*using a*  
26  
27 *preconceived framework runs the risk of prematurely excluding alternative ways of organising the*  
28  
29 *data*"[37]pg.362. However, data was analysed inductively first before mapping emergent themes onto the Grol  
30  
31 and Wensing Framework. In subsequent phases of analysis we adapted the framework to capture the  
32  
33 influence of the external environment on implementation. Social desirability bias is a risk when stakeholders  
34  
35 are known to the researcher conducting the interviews. In this case the stakeholders knew the researcher as  
36  
37 the programme evaluator. However, we do not believe this bias had an effect as stakeholders were keen to  
38  
39 "*tell their story*". It is also important to note that parental attitudes reported in this study were based on the  
40  
41 perceptions of staff delivering the programme. Other studies have identified differences between parents,  
42  
43 staff and children in terms of their attitudes towards childhood obesity treatment [35]. We are conducting  
44  
45 further research with parents and children to understand the factors influencing their decisions to engage or  
46  
47 disengage with obesity treatment.

## 48 49 **CONCLUSION**

50  
51  
52 In light of the dearth of knowledge available on the translation of multi-component childhood weight  
53  
54 management programmes to community settings, this study highlights the barriers and facilitators to  
55  
56 implementing such programmes from a wide range of community healthcare and admin perspectives. Our  
57  
58 results suggest the assignment of clear roles and responsibilities, the provision of sufficient practical training  
59  
60



1  
2  
3 and resources, and organisational support play pivotal roles in overcoming barriers to change. Furthermore,  
4  
5 our findings on the challenges of multidisciplinary working and translating hospital programmes to community  
6  
7 settings are applicable to the implementation of interventions beyond that of childhood weight management.  
8  
9 This evidence should be used to develop implementation plans to improve the translation of interventions into  
10  
11 real world settings.

#### 12 13 **STATEMENTS:**

- 14  
15  
16 • Authors' contributions

17  
18 The authors responsibilities were as follows: EK: was responsible for the design and conduct of the research,  
19  
20 and writing of the manuscript. SMH: was involved in data analysis and reviewed drafts of the manuscript. EK,  
21  
22 SMH, JH, FS and IJP made critical revisions to the paper and gave final approval of the version to be submitted.  
23

- 24  
25  
26 • Acknowledgements

27  
28 We are grateful to the stakeholders who agreed to be interviewed for the study, without them this research  
29  
30 would not have been possible.

- 31  
32  
33 • Competing interests

34  
35 The authors declare that they have no competing interests

- 36  
37  
38 • Funding

39  
40 Source of support: E Kelleher is funded by the Health Research Board SPHeRE/2013/1. The Health Research  
41  
42 Board (HRB) supports excellent research that improves people's health, patient care and health service  
43  
44 delivery. We aim to ensure that new knowledge is created and then used in policy and practice. In doing so, we  
45  
46 support health system innovation and create new enterprise opportunities. Dr Sheena McHugh is funded by  
47  
48 the Centre for Ageing Research and Development in Ireland (CARDI), now the Ageing Research and  
49  
50 Development Division within the Institute of Public Health in Ireland (IPH).

- 51  
52  
53 • Data Sharing

54  
55 Topic guides which were used in the interviews are available as additional supporting files. However, signed  
56  
57 confidentiality agreements prevent us from sharing transcripts.

- Ethics approval

Ethical Approval was granted by the Clinical Research Ethics Committee of the Cork Teaching Hospitals.

### References

1. Flynn, M., D. McNeil, B. Maloff, et al., Reducing obesity and related chronic disease risk in children and youth: a synthesis of evidence with 'best practice' recommendations. *Obes Rev*, 2006. **7 Suppl 1**: p. 7-66.
2. Oude Luttikhuis, H., L. Baur, H. Jansen, et al., Interventions for treating obesity in children. *Cochrane Database Syst Rev*, 2009(1): p. Cd001872.
3. Wilfley, D., A. Staiano, M. Altman, et al., Improving access and systems of care for evidence-based childhood obesity treatment: Conference key findings and next steps. *Obesity* (Silver Spring), 2016.
4. National Institute for Health and Clinical Excellence (NICE). Weight management: lifestyle services for overweight or obese children and young people. Clinical Guideline, 47. 2013, NICE: London.
5. World Health Organisation., Report of the Commission on Ending Childhood Obesity. 2016, WHO Document Production Services: Geneva, Switzerland.
6. Nutbeam, D. and A. Bauman, Evaluation in a Nutshell: a practical guide to the evaluation of health promotion programs. Vol. 2. 2013, Australia: McGraw-Hill Education.
7. Welsby, D., B. Nguyen, B. O'Hara, et al., Process evaluation of an up-scaled community based child obesity treatment program: NSW Go4Fun(R). *BMC Public Health*, 2014. **14**: p. 140.
8. Lucas, P., K. Curtis-Tyler, L. Arai, et al., What works in practice: user and provider perspectives on the acceptability, affordability, implementation, and impact of a family-based intervention for child overweight and obesity delivered at scale. *BMC Public Health*, 2014. **14**: p. 614.
9. Stamatakis, K., C. Vinson, and J. Kerner, Dissemination and Implementation Research in Community and Public Health Settings, in *Dissemination and Implementation Research in Health: Translating Science to Practice*, R. Brownson, G. Colditz, and E. Proctor, Editors. 2012, Oxford University Press: New York.
10. Skelton, J. and B. Beech, Attrition in paediatric weight management: a review of the literature and new directions. *Obes Rev*, 2011. **12**(5): p. e273-81.
11. Kelleher, E., M. Davoren, J. Harrington, et al., Barriers and facilitators to initial and continued attendance at community-based lifestyle programmes among families of overweight and obese children: a systematic review. *Obes Rev*, 2016.
12. Keane, E., P. Kearney, I. Perry, et al., Trends and prevalence of overweight and obesity in primary school aged children in the Republic of Ireland from 2002-2012: a systematic review. *BMC Public Health*, 2014. **14**(1): p. 974.
13. Layte, R. and C. McCrory, Growing Up in Ireland. Overweight and Obesity among 9-year olds. 2011, Department of Children and Youth Affairs: Dublin.
14. O'Malley, G., A. Brinkley, K. Moroney, et al., Is the Temple Street W82GO Healthy Lifestyles Programme effective in reducing BMI SDS? . *Obes Facts*, 2012. **5**(Suppl. 1): p. 178-234
15. Hoffmann, T., P. Glasziou, I. Boutron, et al., Better reporting of interventions: template for intervention description and replication (TIDieR) checklist and guide. *BMJ*, 2014. **348**: p. g1687.
16. National Institute for Health and Clinical Excellence (NICE). Obesity. Guidance on the prevention of overweight and obesity in adults and children. Clinical Guideline, 43. 2015, NICE: London.

17. Ritchie, J. and J. Lewis, *Qualitative research practice: a guide for social science students & researchers*. 2003, Thousand Oaks: Sage Publications.
18. Grol, R. and M. Wensing, What drives change? Barriers to and incentives for achieving evidence-based practice. *Med J Aust*, 2004. **180**(6 Suppl): p. S57-60.
19. Department of Health., *A Healthy Weight for Ireland. Obesity Policy and Action Plan: 2016–2025*. 2016: Dublin.
20. Gerards, S.M., P. Dagnelie, M. Jansen, et al., Barriers to successful recruitment of parents of overweight children for an obesity prevention intervention: a qualitative study among youth health care professionals. *BMC Fam Pract*, 2012. **13**: p. 37.
21. Grow, H., C. Hsu, L. Liu, et al., Understanding family motivations and barriers to participation in community-based programs for overweight youth: one program model does not fit all. *J Public Health Manag Pract*, 2013. **19**(4): p. E1-e10.
22. Visram, S., T.D. Hall, and L. Geddes, Getting the balance right: qualitative evaluation of a holistic weight management intervention to address childhood obesity. *J Public Health (Oxf)*, 2012.
23. Newson, L., R. Povey, A. Casson, et al., The experiences and understandings of obesity: families' decisions to attend a childhood obesity intervention. *Psychol Health*, 2013. **28**(11): p. 1287-305.
24. Shiely, F., N. Hon Yan, E. Berkery, et al., The association between weight perception and BMI: Report and measurement data from the growing up in Ireland cohort study of 9 year olds. *Int J Obes*, 2016.
25. Binkin, N., A. Spinelli, G. Baglio, et al., What is common becomes normal: the effect of obesity prevalence on maternal perception. *Nutr Metab Cardiovasc Dis*, 2013. **23**(5): p. 410-6.
26. Barry, C., M. Jarlenski, R. Grob, et al., News Media Framing of Childhood Obesity in the United States From 2000 to 2009. *Pediatrics*, 2011.
27. Moyers, P., L. Bugle, and E. Jackson, Perceptions of school nurses regarding obesity in school-age children. *J Sch Nurs*, 2005. **21**(2): p. 86-93.
28. Steele, R., Y. Wu, C. Jensen, et al., School nurses' perceived barriers to discussing weight with children and their families: a qualitative approach. *J Sch Health*, 2011. **81**(3): p. 128-37.
29. Story, M., D. Neumark-Stzainer, N. Sherwood, et al., Management of child and adolescent obesity: attitudes, barriers, skills, and training needs among health care professionals. *Pediatrics*, 2002. **110**(1 Pt 2): p. 210-4.
30. Turner, K., J. Shield, and C. Salisbury, Practitioners' views on managing childhood obesity in primary care: a qualitative study. *The British Jof Gen Pract*, 2009. **59**(568): p. 856-862.
31. Miller, W. and S. Rollnick, *Motivational Interviewing: Preparing people for change*. 2002, New York: The Guilford Press.
32. Lozano, P., H. McPhillips, B. Hartzler, et al., Randomized trial of teaching brief motivational interviewing to pediatric trainees to promote healthy behaviors in families. *Arch Pediatr Adolesc Med*, 2010. **164**(6): p. 561-6.
33. Department of Health., *A Healthy Weight for Ireland 2016–2025. Obesity Policy and Action Plan 2016*, Stationary Office: Dublin.
34. Laws, R., K. Hesketh, K. Ball, et al., Translating an early childhood obesity prevention program for local community implementation: a case study of the Melbourne InFANT Program. *BMC Public Health*, 2016. **16**: p. 748.
35. Staniford, L.J., J.D. Breckon, R.J. Copeland, et al., Key stakeholders' perspectives towards childhood obesity treatment: A qualitative study. *Journal of Child Health Care*, 2011. **15**(3): p. 230-244.
36. Watson, P., L. Dugdill, K. Pickering, et al., Service evaluation of the GOALS family-based childhood obesity treatment intervention during the first 3 years of implementation. *BMJ Open*, 2015. **5**(2).

- 1  
2  
3 37. Dierckx de Casterle, B., C. Gastmans, E. Bryon, et al., QUAGOL: a guide for qualitative data  
4 analysis. *Int J Nurs Stud*, 2012. **49**(3): p. 360-71.  
5  
6  
7  
8  
9  
10  
11  
12  
13  
14  
15  
16  
17  
18  
19  
20  
21  
22  
23  
24  
25  
26  
27  
28  
29  
30  
31  
32  
33  
34  
35  
36  
37  
38  
39  
40  
41  
42  
43  
44  
45  
46  
47  
48  
49  
50  
51  
52  
53  
54  
55  
56  
57  
58  
59  
60

For peer review only

## Supplementary Material 1: Completed TIDieR checklist

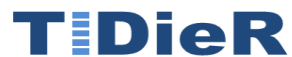

Template for Intervention  
Description and Replication

## The TIDieR (Template for Intervention Description and Replication) Checklist

Information to include when describing an intervention and the location of the information

| Item number | Item                                                                                                                                                                                                              |                                                                                                                                                                                                                                                                                                                                                                                                                                                                                                                                                                                                                                                                                                         |
|-------------|-------------------------------------------------------------------------------------------------------------------------------------------------------------------------------------------------------------------|---------------------------------------------------------------------------------------------------------------------------------------------------------------------------------------------------------------------------------------------------------------------------------------------------------------------------------------------------------------------------------------------------------------------------------------------------------------------------------------------------------------------------------------------------------------------------------------------------------------------------------------------------------------------------------------------------------|
|             | <b>BRIEF NAME</b>                                                                                                                                                                                                 |                                                                                                                                                                                                                                                                                                                                                                                                                                                                                                                                                                                                                                                                                                         |
| 1.          | Provide the name or a phrase that describes the intervention.                                                                                                                                                     | 'W82GO-community' – a multi-component, family-focused childhood weight management pilot programme delivered in the community setting.                                                                                                                                                                                                                                                                                                                                                                                                                                                                                                                                                                   |
|             | <b>WHY</b>                                                                                                                                                                                                        |                                                                                                                                                                                                                                                                                                                                                                                                                                                                                                                                                                                                                                                                                                         |
| 2.          | Describe any rationale, theory, or goal of the elements essential to the intervention.                                                                                                                            | The W82GO-community programme is a family-focused programme grounded in behavioural change theory (transtheoretical model and social cognitive theory) and aims to reduce obesity in children with BMI $\geq$ 98th percentile, improve children's dietary intake, physical activity levels and weight status while also increasing children's quality of life and psychosocial health. Using the social cognitive theory the programmes aims to motivate children and their families to engage in positive behaviours that are achievable. The transtheoretical model is incorporated from initial contact, when the service is first introduced to the family and their level of interest is assessed. |
|             | <b>WHAT</b>                                                                                                                                                                                                       |                                                                                                                                                                                                                                                                                                                                                                                                                                                                                                                                                                                                                                                                                                         |
| 3.          | Materials: Describe any physical or informational materials used in the intervention, including those provided to participants or used in intervention delivery or in training of intervention providers. Provide | The W82GO-community programme includes:<br><br>(1) The W82GO-community pilot programme was delivered by a multi-disciplinary team using a manual developed to support community-based healthcare professionals to deliver the programme in their                                                                                                                                                                                                                                                                                                                                                                                                                                                        |

1 information on where the materials can be accessed (e.g. online  
2 appendix, URL).  
3  
4  
5  
6  
7  
8  
9

area. It does so through the provision of a guide to setting up a team  
and preparing the delivery of the programme; a framework for  
individual sessions that allows for session preparation and planning  
including programme presentations on disc; materials, including  
template letters and evaluation forms that can be adapted to suit the  
local context and information on additional resources that are  
available to support the team

- (2) W82GO leaflet outlining the programmes goals and core elements to be distributed to families during recruitment
- (3) W82GO family information booklet including goal setting and additional resources and tips were distributed to all families attending the programme

10  
11  
12  
13  
14  
15  
16  
17  
18  
19  
20  
21 **4.** Procedures: Describe each of the procedures, activities, and/or  
22 processes used in the intervention, including any enabling or support  
23 activities.  
24  
25  
26  
27  
28  
29  
30  
31  
32  
33  
34  
35  
36  
37  
38  
39  
40  
41  
42  
43

Recruitment: heights and weights were measured in school by public health nurses (PHNs) using standardised procedures. Weight and height data was subsequently used to calculate body mass index (BMI) and children were classified as obese if their BMI plotted  $\geq 98$ th BMI percentile for age and gender using the UK90 recommended cut-off points for treatment or referral which are currently used in Irish practice. Parents of children meeting this eligibility criterion were contacted by their school PHN to inform them of their child's weight status and those who indicated an interest in attending the programme were subsequently invited to attend an initial screening assessment.

This individualised initial assessment assessed eligibility before programme commencement. This assessment was carried out by a multidisciplinary team

1  
2  
3  
4  
5  
6  
7  
8  
9  
10  
11  
12  
13  
14  
15  
16  
17  
18  
19  
20  
21  
22  
23  
24  
25  
26  
27  
28  
29  
30  
31  
32  
33  
34  
35  
36  
37  
38  
39  
40  
41  
42  
43  
44  
45  
46  
47

to rule out underlying medical conditions. In addition, indicators of health literacy, health beliefs and physical and environmental variables that might act as barriers to change were recorded.

Following the initial assessment six group sessions took places over six weeks and group booster sessions occurred at three, six and nine months. During these group sessions parents and their children received an educational session for the first hour. Children were taken out to complete physical activity for the last 30 minutes while parents received an extra educational session. At 12 months another individualised final assessment took place to document any changes and make plans for sustainment.

#### WHO PROVIDED

5. For each category of intervention provider (e.g. psychologist, nursing assistant), describe their expertise, background and any specific training given.

The W82GO community-programme was delivered by a multidisciplinary team of community health professionals including dietitians, physiotherapists, public health nurses, psychologists, health promotion officers, area medical officers, administrators and local area management. These health professionals had varying levels of experience of dealing with childhood obesity and as a result were invited to take part in a training programme prior to programme commencement. Training included a needs assessment, a one day educational training course and two days of clinical shadowing with an experienced *W82GO* programme practitioner at Temple Street Children's University Hospital in Dublin, Ireland. Each community practitioner was also supplied with a user manual which outlined the programme and detailed the content for both phases.

Public health nurses in one of the sites received motivational interviewing training specific to childhood obesity as part of routine training in the area already being conducted in that area.

**HOW**

6. Describe the modes of delivery (e.g. face-to-face or by some other mechanism, such as internet or telephone) of the intervention and whether it was provided individually or in a group.

The W82GO-community programme involved face-to-face sessions and included a mixture of group and individualised sessions as outlined above.

**WHERE**

7. Describe the type(s) of location(s) where the intervention occurred, including any necessary infrastructure or relevant features.

Initial assessments took place in community healthcare offices. Subsequent group sessions were delivered on weekdays in the afternoon at a local sports or community centre.

**WHEN and HOW MUCH**

8. Describe the number of times the intervention was delivered and over what period of time including the number of sessions, their schedule, and their duration, intensity or dose.

The programme was run in two sites (Site A and Site B) over 12 months. The individual assessment lasted approximately one and half to two hours. The initial intensive phase consisted of 6 weekly group sessions for both the child and his/her parent/carer and these occurred over one afternoon a week and lasted approximately one and a half to two hours. The three booster sessions at three, six and nine months lasted approximately one to one and a half hours. During these group sessions parents and their children received an educational session for the first hour. Children were taken out to complete physical activity for the last 30 minutes while parents received an extra educational session. Upon completion of the 12 month programme children and their parents/carer return for a final assessment lasting approx. one and half to two hours. This



model of implementation is in keeping with the transtheoretical model of behaviour change.

#### TAILORING

9. If the intervention was planned to be personalised, titrated or adapted, then describe what, why, when, and how. All families received the same intervention.

#### MODIFICATIONS

- 10.† If the intervention was modified during the course of the study, describe the changes (what, why, when, and how). Two sites delivered the pilot programme to their respective communities. Site A decided to separate children and parents from the start of the group sessions because they felt children of this age would not gain anything nor were likely to understand the educational sessions. Children received a full physical activity session instead while parents received the educational session alone. Owing to low numbers attending the programme in Site B programme staff chose not to go ahead with the final assessment at 12 months and instead conducted the final assessments during the third booster session.

#### HOW WELL

11. Planned: If intervention adherence or fidelity was assessed, describe how and by whom, and if any strategies were used to maintain or improve fidelity, describe them. Fidelity of intervention delivery was assessed using trainer self-reports and exit interviews.
- 12.‡ Actual: If intervention adherence or fidelity was assessed, describe the extent to which the intervention was delivered as planned. In Site A, the programme was delivered in a more interactive manner (i.e. without the use of programme slides). Site B followed the manuals as planned.

\*\* **Authors** - use N/A if an item is not applicable for the intervention being described. **Reviewers** – use ‘?’ if information about the element is not reported/not sufficiently reported.

† If the information is not provided in the primary paper, give details of where this information is available. This may include locations such as a published protocol or other published papers (provide citation details) or a website (provide the URL).

‡ If completing the TIDieR checklist for a protocol, these items are not relevant to the protocol and cannot be described until the study is complete.

\* We strongly recommend using this checklist in conjunction with the TIDieR guide (see *BMJ* 2014;348:g1687) which contains an explanation and elaboration for each item.

For peer review only - <http://bmjopen.bmj.com/site/about/guidelines.xhtml>

1 \* The focus of TIDieR is on reporting details of the intervention elements (and where relevant, comparison elements) of a study. Other elements and methodological features of studies are  
2 covered by other reporting statements and checklists and have not been duplicated as part of the TIDieR checklist. When a **randomised trial** is being reported, the TIDieR checklist should be  
3 used in conjunction with the CONSORT statement (see [www.consort-statement.org](http://www.consort-statement.org)) as an extension of **Item 5 of the CONSORT 2010 Statement**. When a **clinical trial protocol** is being  
4 reported, the TIDieR checklist should be used in conjunction with the SPIRIT statement as an extension of **Item 11 of the SPIRIT 2013 Statement** (see [www.spirit-statement.org](http://www.spirit-statement.org)). For  
5 alternate study designs, TIDieR can be used in conjunction with the appropriate checklist for that study design (see [www.equator-network.org](http://www.equator-network.org)).  
6  
7  
8  
9  
10  
11  
12  
13  
14  
15  
16  
17  
18  
19  
20  
21  
22  
23  
24  
25  
26  
27  
28  
29  
30  
31  
32  
33  
34  
35  
36  
37  
38  
39  
40  
41  
42  
43  
44  
45  
46  
47

For peer review only

## COREQ Checklist for Qualitative Research:

| No. Item                                       | Guide questions/description                                                                                                                              | Reported on Page # |
|------------------------------------------------|----------------------------------------------------------------------------------------------------------------------------------------------------------|--------------------|
| <b>Domain 1: Research team and reflexivity</b> |                                                                                                                                                          |                    |
| <i>Personal Characteristics</i>                |                                                                                                                                                          |                    |
| 1. Interviewer/facilitator                     | Which author/s conducted the interview or focus group?                                                                                                   | Pg. 6              |
| 2. Credentials                                 | What were the researcher's credentials? E.g. PhD, MD                                                                                                     | Pg. 1, 6 & 7       |
| 3. Occupation                                  | What was their occupation at the time of the study?                                                                                                      | Pg. 1, 6           |
| 4. Gender                                      | Was the researcher male or female?                                                                                                                       | Pg. 1,6            |
| 5. Experience and training                     | What experience or training did the researcher have?                                                                                                     | Pg. 6              |
| <i>Relationship with participants</i>          |                                                                                                                                                          |                    |
| 6. Relationship established                    | Was a relationship established prior to study commencement?                                                                                              | Pg. 3              |
| 7. Participant knowledge of the interviewer    | What did the participants know about the researcher? e.g. personal goals, reasons for doing the research                                                 | Pg. 15             |
| 8. Interviewer characteristics                 | What characteristics were reported about the interviewer/facilitator? e.g. Bias, assumptions, reasons and interests in the research topic                | Pg. 1,3,6          |
| <b>Domain 2: study design</b>                  |                                                                                                                                                          |                    |
| <i>Theoretical framework</i>                   |                                                                                                                                                          |                    |
| 9. Methodological orientation and Theory       | What methodological orientation was stated to underpin the study? e.g. grounded theory, discourse analysis, ethnography, phenomenology, content analysis | Pg. 6-7            |
| <i>Participant selection</i>                   |                                                                                                                                                          |                    |
| 10. Sampling                                   | How were participants selected? e.g. purposive, convenience, consecutive, snowball                                                                       | Pg. 6              |
| 11. Method of approach                         | How were participants approached? e.g. face-to-face, telephone, mail, email                                                                              | Pg. 6              |
| 12. Sample size                                | How many participants were in the study?                                                                                                                 | Pg. 7              |
| 13. Non-participation                          | How many people refused to participate or dropped out? Reasons?                                                                                          | Pg. 7              |
| <i>Setting</i>                                 |                                                                                                                                                          |                    |
| 14. Setting of data collection                 | Where was the data collected? e.g. home, clinic, workplace                                                                                               | Pg. 6              |
| 15. Presence of non-participants               | Was anyone else present besides the participants and researchers?                                                                                        | NA                 |
| 16. Description of sample                      | What are the important characteristics of the sample? e.g. demographic data, date                                                                        | Pg. 7              |
| <i>Data collection</i>                         |                                                                                                                                                          |                    |

|                                        |                                                                                                                                 |                                                  |
|----------------------------------------|---------------------------------------------------------------------------------------------------------------------------------|--------------------------------------------------|
| 17. Interview guide                    | Were questions, prompts, guides provided by the authors? Was it pilot tested?                                                   | Pg. 6                                            |
| 18. Repeat interviews                  | Were repeat interviews carried out? If yes, how many?                                                                           | NA                                               |
| 19. Audio/visual recording             | Did the research use audio or visual recording to collect the data?                                                             | Pg. 6                                            |
| 20. Field notes                        | Were field notes made during and/or after the interview or focus group?                                                         | Yes                                              |
| 21. Duration                           | What was the duration of the interviews or focus group?                                                                         | Pg. 6                                            |
| 22. Data saturation                    | Was data saturation discussed?                                                                                                  | Pg. 6                                            |
| 23. Transcripts returned               | Were transcripts returned to participants for comment and/or correction?                                                        | No                                               |
| <b>Domain 3: analysis and findings</b> |                                                                                                                                 |                                                  |
| <i>Data analysis</i>                   |                                                                                                                                 |                                                  |
| 24. Number of data coders              | How many data coders coded the data?                                                                                            | Pg. 7                                            |
| 25. Description of the coding tree     | Did authors provide a description of the coding tree?                                                                           | N/A                                              |
| 26. Derivation of themes               | Were themes identified in advance or derived from the data?                                                                     | Pg. 7                                            |
| 27. Software                           | What software, if applicable, was used to manage the data?                                                                      | Pg. 7                                            |
| 28. Participant checking               | Did participants provide feedback on the findings?                                                                              | NA                                               |
| <i>Reporting</i>                       |                                                                                                                                 |                                                  |
| 29. Quotations presented               | Were participant quotations presented to illustrate the themes/findings? Was each quotation identified? e.g. participant number | Pg. 8-13                                         |
| 30. Data and findings consistent       | Was there consistency between the data presented and the findings?                                                              | Pg. 8-13                                         |
| 31. Clarity of major themes            | Were major themes clearly presented in the findings?                                                                            | Pg. 8-13                                         |
| 32. Clarity of minor themes            | Is there a description of diverse cases or discussion of minor themes?                                                          | Discussion of major and minor themes<br>Pg. 8-13 |

# BMJ Open

## Barriers and facilitators to the implementation of a community-based, multidisciplinary, family-focused childhood weight management programme in Ireland: A qualitative study

|                                 |                                                                                                                                                                                                                                                                                                                                                                          |
|---------------------------------|--------------------------------------------------------------------------------------------------------------------------------------------------------------------------------------------------------------------------------------------------------------------------------------------------------------------------------------------------------------------------|
| Journal:                        | <i>BMJ Open</i>                                                                                                                                                                                                                                                                                                                                                          |
| Manuscript ID                   | bmjopen-2017-016459.R3                                                                                                                                                                                                                                                                                                                                                   |
| Article Type:                   | Research                                                                                                                                                                                                                                                                                                                                                                 |
| Date Submitted by the Author:   | 08-Jul-2017                                                                                                                                                                                                                                                                                                                                                              |
| Complete List of Authors:       | Kelleher, Emily; University College Cork, Epidemiology and Public Health Harrington, Janas; University College Cork, Epidemiology and Public Health Shiely, Frances; University College Cork, Epidemiology and Public Health Perry, Ivan; University College Cork, Epidemiology and Public Health Mc Hugh, Sheena; University College Cork, Epidemiology & Public Health |
| <b>Primary Subject Heading</b>: | Paediatrics                                                                                                                                                                                                                                                                                                                                                              |
| Secondary Subject Heading:      | Qualitative research, Health services research, Public health                                                                                                                                                                                                                                                                                                            |
| Keywords:                       | Implementation, barriers, facilitators, childhood, obesity, community                                                                                                                                                                                                                                                                                                    |
|                                 |                                                                                                                                                                                                                                                                                                                                                                          |

SCHOLARONE™  
Manuscripts

1  
2  
3 Title:  
4

5 Barriers and facilitators to the implementation of a community-based, multidisciplinary, family-focused  
6 childhood weight management programme in Ireland: A qualitative study  
7  
8

9  
10 Corresponding Author:  
11

12 Emily Kelleher, MPH BSc, Department of Epidemiology and Public Health, 4<sup>th</sup> Floor, Western Gateway Building,  
13 University College Cork, Ireland. Email: [emily.kelleher@ucc.ie](mailto:emily.kelleher@ucc.ie) Tel: 00353 (21) 4205517  
14  
15

16  
17 Authors:  
18

19 Emily Kelleher, Department of Epidemiology and Public Health, University College Cork, Ireland  
20  
21

22 Janas M Harrington, Department of Epidemiology and Public Health, University College Cork, Ireland  
23  
24

25 Frances Shiely, Department of Epidemiology and Public Health, University College Cork and HRB Clinical  
26 Research Facility, Mercy University Hospital, Grenville Place, Cork, Ireland  
27  
28

29 Ivan J Perry, Department of Epidemiology and Public Health, University College Cork, Ireland  
30  
31

32 Sheena M McHugh, Department of Epidemiology and Public Health, University College Cork, Ireland  
33  
34

35 Keywords:  
36

37 Implementation; barriers; facilitators; childhood; obesity; community; treatment  
38  
39  
40  
41  
42  
43  
44  
45  
46  
47  
48  
49  
50  
51  
52  
53  
54  
55  
56  
57  
58  
59  
60

**ABSTRACT:**

**Objective:** To explore the barriers and facilitators experienced by those implementing a government-funded, community-based, childhood weight management programme.

**Design:** Qualitative using semi-structured interviews.

**Setting:** Two geographical regions in the south and west of the Republic of Ireland.

**Participants:** 29 national and local level stakeholders responsible for implementing the programme including professionals from dietetics, psychology, public health nursing, physiotherapy, health promotion and administration.

**Methods:** Framework analysis was used to identify barriers and facilitators which were mapped onto six levels of factors influencing implementation outlined by Grol and Wensing: the innovation, the individual professional, the patient, the social context, the organisational context, and the external environment.

**Results:** Most barriers occurred at the level of the organisational context. For all stakeholders, barriers arose due to the multidisciplinary nature of the programme, including the lack of role clarity and added complexity of working in different locations. Health professionals' low-perceived self-efficacy in approaching the subject of weight with parents and parental resistance to hearing about their child's weight status were barriers to programme implementation at the individual professional and patient levels, respectively. The main facilitators of implementation, occurring at the level of the health professional, included stakeholders' recognition of the need for a weight management programme and personal interest in the area of childhood obesity. Having a local lead and supportive colleagues were further implementation drivers.

**Conclusions:** This study highlights the complexities associated with implementing a multidisciplinary childhood weight management programme, particularly translating such programmes to a community setting. Our results suggest the assignment of clear roles and responsibilities, the provision of sufficient practical training and resources, and organisational support play pivotal roles in overcoming barriers to change. This evidence can be used to develop an implementation plan to support the translation of interventions into real world settings.

**KEYWORDS:**

Implementation; barriers; facilitators; childhood; obesity; community

**ARTICLE SUMMARY****Strengths and limitations**

- This is one of few qualitative studies, and the first in Ireland, that explored the factors that hampered and facilitated the implementation of a community-based, multi-component childhood weight management programme from a wide range of stakeholder perspectives.
- While interviewing a wide range of stakeholders provided a thorough overview of the relevant issues, the themes that emerged were relatively homogenous across disciplines which added to the authority of the findings.
- Data were analysed using a systematic approach and an adapted version of the implementation model by Grol and Wensing was used to classify the barriers and facilitators into levels.
- Using a preconceived framework runs the risk of prematurely excluding other ways of organising the data. However, data was analysed inductively first before mapping onto the Grol and Wensing Framework.

**BACKGROUND:**

Childhood obesity is a worldwide public health concern and there is now widespread agreement that the complex aetiology of the issue requires a multifaceted approach to treatment [1-3]. International recommendations agree that initiatives to reduce and manage childhood obesity should be family-focused and combine healthy eating, physical activity and behavioural components [2, 4, 5]. In 2016, the World Health Organisation published their report of the commission on ending childhood obesity within which they echo these recommendations but also add that they should be delivered by “*multi-professional teams with appropriate training and resources*” [5]pg.11. These recommendations, however, have been largely based on small-scale studies conducted in controlled settings with specialised staff, thus limiting their applicability and generalizability to ‘real-world’ settings such as communities or hospitals [2].



1  
2  
3 In public health, once interventions have undergone innovation testing and demonstrated efficacy the next  
4 steps include replication and 'scale-up' to larger populations in 'real-world' settings [6]. There are relatively  
5 few examples of published studies reporting on the pragmatic application of effective childhood obesity  
6 treatment programmes [7, 8]. While implementation issues such as engagement, local context, staffing and  
7 funding are likely to be common across many public health interventions [8], little is documented about the  
8 experience of those implementing childhood weight management programmes and even fewer studies detail  
9 the factors influencing implementation [9]. For example, a lack of providers trained in evidence-based care for  
10 childhood obesity was listed by delegates attending a recent conference in the United States as a major barrier  
11 to treatment implementation [3]. Furthermore, with the majority of families declining referral and up to 75%  
12 of families discontinuing care, poor engagement with families has proven to be a significant challenge facing  
13 teams tasked with implementing such programmes [10, 11].

14  
15  
16  
17  
18  
19  
20  
21  
22  
23  
24  
25 When introduced under less-controlled conditions, insight into the factors influencing implementation is  
26 crucial. Therefore, the aim of this study was to explore and categorise the barriers and facilitators experienced  
27 by those implementing a government-funded, community-based, multi-component childhood weight  
28 management pilot programme to inform their eventual scale up.

## 29 30 31 32 33 **METHODS:**

### 34 35 36 **Intervention and context**

37  
38 Although trends appear to be stabilising in Ireland, prevalence of childhood obesity remains high [12].  
39 Currently, in Ireland, almost one in four children are either overweight or obese [13] and there is no  
40 standardised community-based weight management programme available to those children with obesity.  
41 Community programmes are usually provided on an ad-hoc basis and are rarely evaluated or sustained. In an  
42 attempt to identify a universal treatment the Irish Health Service Executive (HSE) planned to pilot the *W82GO-*  
43 *community* programme in two communities. This programme had previously demonstrated effectiveness in  
44 the hospital setting [14]. Its effectiveness in the community setting was to be assessed with the intention of  
45 nationwide rollout should the programme demonstrate a positive impact on body mass index (BMI). The  
46 Template for Intervention Description and Replication (TIDieR) checklist [15] was used to specify the details of  
47 programme delivery and is included in Supplementary file 1.

1  
2  
3 In summary, *W82GO* aims to improve nutrition, increase physical activity and facilitate behaviour change over  
4 one year [14]. It was designed as a hospital-based, family-focused, multidisciplinary programme grounded in  
5 behavioural change theory and was modelled on best practice recommendations [2, 5, 16]. The primary goal  
6 was a reduction in Body Mass Index Standard Deviation Score and has previously been found to be effective  
7 when delivered in a hospital out-patient setting [14].  
8  
9

10  
11  
12 The *W82GO* programme involves an initial individual assessment to ascertain family eligibility followed by two  
13 phases. Families were eligible for the programme if the child was between 5-7 years old; was obese (BMI  
14  $\geq 98$ th centile); had no limitations to engaging in physical activity; was not taking medication known to affect  
15 body weight; and had at least one parent/carer who was able to attend each of the programme sessions.  
16 Siblings were also welcome to attend the sessions. Phase 1 involved an initial intensive phase consisting of six  
17 weekly group sessions for both the child and his/her parent/carer. These sessions lasted approximately one  
18 and a half to two hours and incorporated educational and practical sessions to increase physical activity,  
19 improve nutrition and increase sleep. Upon completion of phase 1, children returned with their parents/care-  
20 givers for three booster group sessions at three, six and nine months. These sessions aimed to encourage the  
21 family to continue with lifestyle change and to manage any barriers to change. Finally, at 12 months, the  
22 children and their parents/care-givers returned for a final individual assessment to document any changes and  
23 make plans for sustainment.  
24  
25  
26  
27  
28  
29  
30  
31  
32  
33  
34  
35  
36

37 For the current study, *W82GO* was adapted and implemented in two community sites (Site A and Site B) from  
38 April 2015 for 12 months and subsequently renamed *W82GO-community*. Both sites were chosen as they were  
39 part of a national pilot growth measurement programme and included a mix of rural and urban towns in the  
40 west and south of Ireland. Initial assessments took place in community healthcare offices while subsequent  
41 group sessions were delivered on weekdays in the afternoon at a local sports or community centre. The  
42 programme was offered free of charge and was delivered by existing community health professionals including  
43 dietitians, psychologists, public health nurses, physiotherapists, health promotion officers, area medical  
44 officers and administrators. These health professionals were brought together as a team and asked to deliver  
45 this programme as part of their existing roles. Table 1 outlines their specific responsibilities during programme  
46 implementation. All staff were invited to take part in a training programme prior to programme  
47 commencement. Training included a needs assessment, a one day educational training course and two days of  
48  
49  
50  
51  
52  
53  
54  
55  
56  
57  
58  
59  
60

clinical shadowing with an experienced *W82GO* programme practitioner at the National Children's University Hospital where it was developed. Each community practitioner was supplied with a user manual which outlined the programme and detailed the content for both phases.

**Table 1 Health professional roles during the implementation of *W82GO*-community**

| Health Professional             | Role in implementation of <i>W82GO</i> -community                                                                                        |
|---------------------------------|------------------------------------------------------------------------------------------------------------------------------------------|
| National Manager (n=1)          | Overseeing implementation of <i>W82GO</i> -community in both community sites                                                             |
| Local Manager (n=2)             | Overseeing implementation of <i>W82GO</i> -community at local level. Local manager in Site B was involved in referring to the programme. |
| Physiotherapists (n=4)          | Involved in initial assessments and delivering programme material                                                                        |
| Dietitians (n=5)                | Involved in initial assessments and delivering programme material                                                                        |
| Psychologists (n=3)             | Involved in initial assessments and delivering programme material                                                                        |
| Public Health Nurses (n=13)     | Referral to the programme                                                                                                                |
| Area Medical Officers (n=4)     | Involved in initial assessments                                                                                                          |
| Health Promotion Officers (n=4) | Delivering programme material                                                                                                            |
| Administration (n=2)            | Involved in contacting parents re programme sessions                                                                                     |

### Study design and sample

A qualitative approach using semi-structured interviews was utilised. We adopted a purposive approach to sampling, inviting stakeholders with knowledge and experience of planning, coordinating or delivering *W82GO*-community. To ensure representation from each stakeholder group and given the small number of individuals in each, we invited all stakeholders to participate (n=38, see table 1). All stakeholders were contacted by email in the first instance and followed up by telephone contact during which the researcher outlined the study aims and methodology.

### Data collection

All participants were invited to take part in face-to-face interviews. However, due to time and scheduling difficulties a mixture of telephone and face-to-face interviews were conducted between August 2015 and February 2016 (during programme implementation). To ensure consistency all interviews were conducted by a single trained qualitative researcher (EK), using a semi structured topic guide. Participants knew the interviewer as an independent programme evaluator conducting this research as part of her PhD training. The topic guide was developed based on relevant literature and focused on seven issues: (1) awareness of the

1  
2  
3 issue of childhood obesity and existing healthy lifestyle programmes, (2) perceived value of and interest in  
4 community evidence-based treatment programmes, (3) communication of the *W82GO-community* pilot  
5 programme; (4) specific role in implementing *W82GO-community*; (5) barriers and enablers to  
6 implementation; (6) perceived successes and challenges experienced and finally (7) recommendations for the  
7 future roll-out of childhood weight management programmes in Irish communities. Core topics were the same  
8 across stakeholders and particular probes were added for specific stakeholder groups depending on their role  
9 during the programme. For example public health nurses were specifically asked to report on the barriers and  
10 facilitators to referral. Prompts and probes were used throughout the interviews to stimulate discussion. Prior  
11 to each interview, participants were informed about the purpose of the study, that participation was voluntary  
12 and that they could terminate the interview at any stage for any reason. Signed informed consent was  
13 obtained before each interview, which lasted on average 45 minutes. Interviews were digitally recorded and  
14 transcribed verbatim. Data collection and analysis was iterative. Data saturation was judged to have been  
15 reached between interviews 20 and 25. However during recruitment, other stakeholders had expressed an  
16 interest in sharing their experience and so were given the opportunity to participate. The data from these  
17 interviews overlapped with the existing coding framework and thus contributed to the main themes. Ethical  
18 approval was granted by the Clinical Research Ethics Committee of the Cork Teaching Hospitals.

### 34 35 **Data Analysis**

36  
37 Framework analysis was used to analyse the data [17]. This approach enabled the investigation of a priori  
38 objectives while also allowing new themes to emerge from the data. One researcher (EK) transcribed and  
39 coded each transcript while another (SMH) undertook initial coding of a selection of transcripts. Similarities  
40 and differences between the coding labels and definitions were discussed and the coding framework was  
41 refined and applied to the remaining interviews. While this process was conducted at an early stage of the  
42 analysis, the coding process was iterative; emergent codes were added to the framework and contributed to  
43 the development of themes across the interviews. Codes were synthesised and grouped according to the  
44 dominant emergent themes. Themes were also analysed across stakeholder groups to identify similarities and  
45 differences across disciplines and positions. These themes were mapped onto a framework developed by Grol  
46 and Wensing (2004) which specifies six levels of factors that facilitate or impede implementation success: the  
47 innovation; the individual professional, the patient; the social context; the organisational context; and the  
48  
49  
50  
51  
52  
53  
54  
55  
56  
57  
58  
59  
60

economic and political environment [18]. Mapping emergent themes to the framework at this stage of the analysis ensured that we did not impose a predefined structure or terminology on participants' accounts. This well-established framework (Table 2) was chosen because it describes how barriers and facilitators can be identified, categorised, and used for the development of tailor-based implementation strategies to facilitate desired change [18], in this instance implementing the *W82GO-community* programme. Discrepancies on the mapping of themes were discussed until consensus was reached. NVivo (QSR v10) was used to manage data analysis.

**Table 2 Barriers to and incentives for change at different levels of healthcare<sup>a</sup>**

| Level                          | Barriers / Incentives                                                           |
|--------------------------------|---------------------------------------------------------------------------------|
| Innovation                     | Advantages in practice, feasibility, credibility, attractiveness, accessibility |
| Individual Practitioner        | Awareness, knowledge, attitude, motivation to change, behavioural routines      |
| Patient                        | Knowledge, skills, attitude, compliance                                         |
| Social Context                 | Opinion of colleagues, culture of the network, collaboration, leadership        |
| Organisational Context         | Organisation of care processes, staff, capacities, resources, structures        |
| Economic and Political Context | Financial arrangements, regulations, policies                                   |

<sup>a</sup>*Grol and Wensing's multilevel model*[18]

## RESULTS

### Participant characteristics

We contacted 38 stakeholders and recruited 29 interviewees (7 face-to-face, 22 telephone) from a range of disciplines and professions, yielding a response rate of 76% (Table 3).

**Table 3 Stakeholders recruited from Site A and Site B**

|                           | Site A | Site B | National | Total |
|---------------------------|--------|--------|----------|-------|
| National Manager          | NA     | NA     | 1        | 1     |
| Local Manager             | 1      | 1      | x        | 2     |
| Physiotherapists          | 2      | 1      | 1        | 4     |
| Dietitians                | 3      | x      | x        | 3     |
| Psychologists             | 1      | 1      | x        | 2     |
| Public Health Nurses      | 6      | 3      | x        | 9     |
| Area Medical Officers     | x      | 2      | x        | 2     |
| Health Promotion Officers | 3      | 1      | x        | 4     |
| Administration            | 1      | x      | 1        | 2     |
| Total                     | 17     | 9      | 3        | 29    |

### Barriers and Facilitators

For all participants, barriers arose due to the multidisciplinary nature of the programme, including the lack of understanding of other disciplines, lack of role clarity as well as the added complexities of working in different locations. Participants' recognition of the need for a childhood obesity programme and their own personal interest in the area were the main drivers of implementation while the presence of a local lead and supportive colleagues were further enabling factors. Views on the main barriers and facilitators to implementation were consistent across stakeholders; despite different disciplinary backgrounds, they had common experiences as implementers adding to the authority of the findings. Table 4 presents the perceived barriers and facilitators from the perspective of the stakeholders mapped onto the six implementation levels with quotations to illustrate each level.

**Table 4 Perceived Barriers and Facilitators to the Implementation of W82GO in the Community**

| Levels                                                                 | Quotations to illustrate the identified levels                                                                                                                                                                                                                                                                                                                                                                                                               |
|------------------------------------------------------------------------|--------------------------------------------------------------------------------------------------------------------------------------------------------------------------------------------------------------------------------------------------------------------------------------------------------------------------------------------------------------------------------------------------------------------------------------------------------------|
| <b>The Innovation</b>                                                  |                                                                                                                                                                                                                                                                                                                                                                                                                                                              |
| Credibility                                                            | (+) <i>"I suppose because it was attached to an acute hospital and because there was a consultant paediatrician and you had a lot of disciplines and a lot of very competent professionals involved, and that it had been successful when delivered there. That was the main reason I believed in the programme I suppose", W82GO003</i>                                                                                                                     |
| Attractiveness (i.e. Multidisciplinary nature)                         | (+) <i>"I do think the MDT approach was superb. I think that is you're going to do something for a child who is obese then you need it." W82GO018</i>                                                                                                                                                                                                                                                                                                        |
| Transferability (i.e. different population, different resource issues) | (-) <i>"You are talking about a different cohort of families. Families who are already in the system. They are used to going in for appointments. You're talking about a group who've already had difficulties identified by their GP or whoever so by the time they are going for the group they are already sold, they are used to it and they are used to that sort of setting which is very kind of fast and quick-paced and very focused", W82GO002</i> |
| Relevance (e.g. too medicalised)                                       | (-) <i>"I think the area medical officer, the medical input I think is probably optional or at least part-time. It's of less importance. It medicalised this community programme a bit too much", W82GO021</i>                                                                                                                                                                                                                                               |
| <b>The Individual Professional</b>                                     |                                                                                                                                                                                                                                                                                                                                                                                                                                                              |
| Awareness of the problem / Recognition of need                         | (+) <i>"It is a problem, most definitely. I think it's a time bomb that went off over the past 10 years and that we are behind it. Way behind it and the sooner we get going and get doing something the better", W82GO013</i>                                                                                                                                                                                                                               |
| Personal interest and motivation                                       | (+) <i>"So that enthusiasm and that dedication made it happen, it was key to its success", W82GO011</i>                                                                                                                                                                                                                                                                                                                                                      |
| Low self-efficacy                                                      | (-) <i>"I wouldn't be especially skilled in assessing children you know with obesity and that kind of thing... Or talking to parents about it... I was concerned about my own ability to, to get up to speed fairly quickly", W82GO015</i>                                                                                                                                                                                                                   |

|                                                       |                                                                                                                                                                                                                                                                                                                                                                                                                                                                                                                                                                                                                                                                                                                                                                                                         |
|-------------------------------------------------------|---------------------------------------------------------------------------------------------------------------------------------------------------------------------------------------------------------------------------------------------------------------------------------------------------------------------------------------------------------------------------------------------------------------------------------------------------------------------------------------------------------------------------------------------------------------------------------------------------------------------------------------------------------------------------------------------------------------------------------------------------------------------------------------------------------|
| Attitudes (i.e. Multidisciplinary perspectives)       | (-) "I suppose the other main challenge was the multidisciplinary nature of the programme. I think the challenges of it is when you put together a team obviously from all different backgrounds not with different agendas but with different experiences and knowledge and different perspectives", W82GO026                                                                                                                                                                                                                                                                                                                                                                                                                                                                                          |
| <b>The Patient</b>                                    |                                                                                                                                                                                                                                                                                                                                                                                                                                                                                                                                                                                                                                                                                                                                                                                                         |
| Parental Resistance (weight misperception and denial) | (-) "I think there was a denial that there was anything wrong with their child, or that their child was overweight. There was a total denial about that because the population in general look like their child. Their child may be a little bit above of what the normal population looks like, but they didn't see that as an issue at all", W82GO028                                                                                                                                                                                                                                                                                                                                                                                                                                                 |
| <b>The Social Context</b>                             |                                                                                                                                                                                                                                                                                                                                                                                                                                                                                                                                                                                                                                                                                                                                                                                                         |
| Supportive colleagues                                 | (+) "Once she came on board there was two of us, it was a lot easier to share the workload and if I couldn't be there for a day she could be there for it so I suppose that definitely took the load off and she also acted as a sounding board you know? If there was something I wasn't sure of I could say what do you think about this and vice-versa, you know what I mean?", W82GO016                                                                                                                                                                                                                                                                                                                                                                                                             |
| Leadership                                            | (+) "I mean if we didn't have her pulling all those people and bits together it wouldn't have worked. She did a great job in I think the co-ordination role cause I think running something like this with people dispersed across a whole county and city then you need a project manager on the ground.", W82GO017                                                                                                                                                                                                                                                                                                                                                                                                                                                                                    |
| Collaboration between national and local teams        | (-) "I did feel there was a very big gap once the decision had been made nationally to roll this out, there was a very big gap between us on the ground and them, there was no consultation or collaboration with people on the ground and I think that's where the problem was", W82GO003                                                                                                                                                                                                                                                                                                                                                                                                                                                                                                              |
| <b>The Organisational Context</b>                     |                                                                                                                                                                                                                                                                                                                                                                                                                                                                                                                                                                                                                                                                                                                                                                                                         |
| MDT Structure (logistics)                             | (-) "I suppose one of the challenges definitely is that the health professionals are all in different places", W82GO004                                                                                                                                                                                                                                                                                                                                                                                                                                                                                                                                                                                                                                                                                 |
| Resources                                             | (-) "I guess time constraints 'cause a lot of people were pressurised for time. Like even ourselves we wouldn't have been able to go to every session and I would have liked to have gone but we just couldn't. We didn't have the time. We didn't have the staff to be able to attend so i think time and resource pressures were the main concerns", W82GO013                                                                                                                                                                                                                                                                                                                                                                                                                                         |
| Training                                              | (-) "It (the training) was as if they were trying to sell us the programme when you know we were already there. We were already sold. I mean we knew why it was important... because of the obesity issue so there was no need to go over all that again. They should have just focused on how to actually implement and deliver the programme", W82GO011                                                                                                                                                                                                                                                                                                                                                                                                                                               |
| <b>External Environment</b>                           |                                                                                                                                                                                                                                                                                                                                                                                                                                                                                                                                                                                                                                                                                                                                                                                                         |
| Lack of existing services                             | (+) "There is nothing out there so that's where it was great to have something like W82GO. That if you did see a child that you know there was something. Some sort of pathway"                                                                                                                                                                                                                                                                                                                                                                                                                                                                                                                                                                                                                         |
| Media                                                 | (+) "There was a huge media campaign ongoing around the time we were implementing the programme which got some parents thinking and talking. I mean those things do have a big impact. Things like Operation Transformation that's aired in January have a huge impact. I think we need more media on the impact of childhood obesity and not just the long-term impacts", W82GO003<br><br>(-) "I think maybe it's (obesity) hyped up a little bit in the media. I think maybe that in itself could be making things difficult for parents to come forward. We don't have any other disease related issue hyped up as much you know? If you had a child with obesity you would be feeling a small bit cringe like. You'd be wanting to find somewhere private to get some help like you know", W82GO020 |
| Stigma                                                | (-) "Wouldn't have their child come to a programme in case they'd be labelled overweight or obese. There is a stigma and just from hearing again I wasn't in the parents room, but just from hearing other colleagues feedback it's the parents fear of feeling judged and                                                                                                                                                                                                                                                                                                                                                                                                                                                                                                                              |

|  |                          |
|--|--------------------------|
|  | <i>blamed</i> ”,W82GO002 |
|--|--------------------------|

(+) Facilitators, (-) Barriers.

### The Innovation

In terms of the *W82GO-community* pilot programme (innovation), while stakeholders believed it came from a credible source having been developed by one of the national children’s hospitals in Ireland, many had doubts over its accessibility and about how well it would transfer to the community setting. This uncertainty resulted in feelings of unease and community practitioners were hesitant to get involved initially. One stakeholder explained how she worried at length about what impact the programme would have on existing services and how feasible it was to run in the community; *“The setting is different. We were taking a programme that was from an acute setting into the community - that possibly was where the breakdown happened because you didn't have the same services. You didn't have people on site. There was travel, there was all these other logistics that weren't thought about when they were moving an acute programme to the community”*, W82GO021. In particular, stakeholders believed they were dealing with a very different cohort of families than the hospital-based programme as described by the following quote; *“You've a very different kind of child coming into the hospital than you do in the general community. You've a very different kind of parent. Even if you had a parent who was resistant to hearing about their child being overweight, if they are attending hospital appointments regularly they are obviously already engaged about their child's health... so I believe that's a major barrier straight away that they possibly didn't have to face in the hospital you know?”*, W82GO010.

In addition to the differences in the target group, stakeholders believed the programme was too medicalised for the community setting and some felt it did not fit with their perception of a healthy lifestyle programme. This was due to the number of health professionals involved and in particular, the involvement of medical staff. Furthermore, many stakeholders thought the collection of clinical markers of disease and medical history during the initial assessments was unnecessary. As one stakeholder described; *“the initial assessments were totally irrelevant. I mean when I heard that bloods were being taken I thought oh for God sake. You know we were supposed to be running a community-based education intervention where the focus should be on changing lifestyles. It's not our job to be diagnosing other problems”*, W82GO005.



### Individual Professional

While stakeholders both applauded and recognised the need for a multidisciplinary approach to the treatment of childhood obesity, it created significant barriers to programme implementation. The variety of community health professionals involved in the implementation of *W82GO-community* with differing perspectives and priorities led to role uncertainty and in some cases a perception of disrespect between disciplines. One stakeholder captures this theme in the following quote; *"I suppose the other main challenge was the multidisciplinary nature of the programme. I think the challenge is when you put together a team obviously from all different backgrounds not with different agendas but with different experiences and knowledge and different perspectives"*, W82GO026. Stakeholders described how *"there was quite a lack of understanding of the various discipline roles and responsibilities and some were even unsure of what some disciplines did"*, W82GO012. This lack of understanding sometimes resulted in tension between disciplines and created a challenging environment to work in. Others recalled feeling concerned about where they fit into the programme and believed a structured programme plan outlining specific roles and responsibilities was lacking.

Another key barrier that emerged at the level of the individual professional was their low perceived self-efficacy in dealing with childhood obesity and/or working with this young age group. In particular, many stakeholders reported their fear of approaching the subject with parents given the risk of upsetting them or *"rocking the boat"*. One stakeholder reported that *"it's something you want to do something about but it can be very difficult to approach the subject with parents. It's a very sensitive issue"*, W82GO001. In our study, stakeholders in Site A received motivational interviewing workshops for childhood obesity. This training equipped these stakeholders with increased skills and confidence in working with families on weight management issues. As one stakeholder described, post motivational interviewing training she wasn't *"frightened of dealing with them [parents] at all", It's kind of second nature to me now... I know the buzz words, I know exactly what to say to them. And body language, the whole lot"*, W82GO002. Others felt it was quite *"alien"* to work with children aged 5-6 years and believed they had not the appropriate training to do so.

Despite these barriers, all stakeholders were aware that childhood obesity was an issue in their respective communities and recognised the urgent need for treatment; *"Yeah I think it's a time bomb that went off over*

1  
2  
3 *the past ten years and that we are behind it, way behind and the sooner we get going and doing whatever we*  
4 *can the better”, W82GO012. Furthermore, stakeholders’ personal interest in tackling the issue, and their*  
5 *motivation and dedication to seeing the programme through were what many believed to be the main drivers*  
6 *behind programme completion; “It went ahead due to a lot of determination and not because it was easily*  
7 *implementable... if that’s a word”, W82GO014.*

### 13 **Patient**

14  
15  
16 Low programme uptake was a key issue during implementation. Many stakeholders believe that obesity has  
17 become the norm in society and as a result *“people don’t recognise overweight people as being in that actual*  
18 *overweight category because it’s become normal to be surrounded by overweight people”, W82GO021. In*  
19 *terms of the W82GO-community pilot programme, almost all stakeholders indicated that although children*  
20 *measured as obese on the growth charts their parents seemed unaware of any excess weight and once*  
21 *informed, many refused to accept that their child was obese. As a result of this misperception parents did not*  
22 *realise or accept the need for treatment. Speaking of her experience, one stakeholder described how “other*  
23 *parents just didn’t reply or didn’t get in touch because they believed everything was ok and there wasn’t a*  
24 *problem with their child. They didn’t need any programme. I think that definitely was a huge problem out there*  
25 *in the community setting”, W82GO012. Because of this low recognition amongst parents, many stakeholders*  
26 *recalled the resistance they faced when trying to discuss the issue with them and their fear prior to making*  
27 *contact with parents. One stakeholder explained how some parents would “be really angry so you’re taking*  
28 *angry phone calls in the evening. You know when you come in from a day’s work so it was really difficult”,*  
29 *W82GO002.*

### 44 **Social Context**

45  
46 Local level stakeholders believed there was a certain level of *“naïvety”* at national level about the reality of  
47 rolling out the pilot programme on the ground. They felt consultation during the planning stage was lacking  
48 and that national-level stakeholders had *“little experience of the practical aspects of childhood obesity”* as *“no*  
49 *one was actually working with obese children or even groups on a day to day basis”, W82GO004. As a result*  
50 *unrealistic expectations and timeframes prevailed, particularly during the recruitment phase. This led to*  
51 *frustration and confusion among local-level health professionals during implementation.*

1  
2  
3 Communication between national and local level stakeholders was considered poor. However, the presence of  
4 a local lead facilitated the exchange between staff on the ground and management at national level and was  
5 seen by almost all stakeholders as crucial for programme implementation. Furthermore, stakeholders felt that  
6 because of the multidisciplinary approach of the programme *“you needed someone on the ground”*; if they did  
7 not have a local lead *“pulling all those people and bits together, it wouldn't have worked because running*  
8 *something like this with people dispersed across a whole county and city is difficult”*, W82GO005. The presence  
9 of supportive colleagues and management were identified as further enabling factors.  
10  
11  
12  
13  
14  
15  
16

### 17 **Organisational Context**

18  
19 The multidisciplinary structure of the programme also created barriers at the organisational level. In addition  
20 to differing individual perspectives and priorities, the added complexities of working in different locations  
21 created difficulties during programme implementation. In many cases stakeholders didn't *“work at the same*  
22 *site... or even the same town which was a challenge”* as it *“took up a lot of time organising between schedules*  
23 *and travelling to meet and go through practicalities”*, W82GO007.  
24  
25  
26  
27  
28  
29

30 In addition to these challenges, at the organisational level, stakeholders reported that implementation was  
31 hampered due to insufficient resources (i.e. staff and time) and training. It was reported that two other  
32 proposed areas withdrew from the pilot programme because of the lack of staff and leadership on the ground  
33 to run the programme. Stakeholders felt that they had very different resource issues to the hospital-based  
34 teams who are *“within the confines of a hospital... so they would or should have the same vision or focus...  
35 whereas we can see now with a community based programme the professionals can be very different in their  
36 training, they can have a different ethos in the departments within their community. It's very individual. We  
37 have different line managers and different resources to deal with”*, W82GO011. Some stakeholders *“didn't  
38 want to get involved because of existing workloads”*, and the lack of extra resources or allocated time to  
39 implement the pilot. Furthermore, while acknowledging the little time hospital staff had to develop  
40 community-specific training, local-level stakeholders felt they needed more *“practical and tailored”*  
41 information. Many described the training they received as *‘too general’* and stated that *“it would have been  
42 very helpful to have had more practical tips on how to actually run the programme session to session with this  
43 age group”*, W82GO012.  
44  
45  
46  
47  
48  
49  
50  
51  
52  
53  
54  
55  
56  
57  
58  
59  
60

### External Environment

In the Grol and Wensing model, the 'economic and political context' refers to financial arrangements, regulations and policies - themes which did not emerge during our research. Therefore, the sixth level was renamed 'external environment' to include wider societal perspectives and determinants.

In terms of the external environment, the lack of existing services to treat and manage childhood obesity meant many stakeholders were excited to come on board and implement this new initiative. One stakeholder described *"waiting for years for something to happen in this area"*, W82GO005. The media was recognised as both a barrier and a facilitator to programme implementation. While stakeholders believed TV and radio campaigns have the potential to raise awareness they felt that the issue is *"also getting very bad press"* and being *"hyped up a little bit"* which in itself may make it more difficult for parents to come forward. Additionally, staff felt that the stigma surrounding childhood obesity and weight management programmes created a significant barrier to programme implementation as they believed many parents were reluctant to attend or even talk about the issue of weight for fear of singling out or *'labelling'* their child.

### Vision for the future

In terms of the future scale up of *W82GO-community*, the majority of stakeholders recommend establishing dedicated childhood obesity teams within the community, *"ideally people who are located at least in the same town"*, who can offer a range of interventions for different levels of need. One stakeholder described *"a tiered effect, for example there could be a level one which could be a generic workshop or talk that you could roll-out in lots of schools. A level two then would be a seminar for parents and level three would be a group programme. Level four then could be actual specific one on one interventions"*. Having a tiered approach would enable the team to match the level of need with the family and allow families to choose where on the scale they would best fit.

### DISCUSSION

This study identifies the barriers and facilitators to implementing a community-based weight management programme from the perspective of stakeholders tasked with delivering such a programme. While community-based weight management programmes have become an important response to the obesity epidemic given their potential reach and accessibility for families, the majority are based on small, efficacy trials [2] and little is

1  
2  
3 known about the factors influencing their implementation in real-world settings. Our findings suggest that  
4 more consideration is needed during the planning stages, including the creation of a structured programme  
5 plan outlining specific roles and responsibilities. Local-level stakeholders believe they should be involved in this  
6 process as they have practical experience of working with families on the ground in their respective  
7 communities. In addition to their experience, the stakeholders we interviewed are keen to get involved in  
8 community-based weight management treatment provided the appropriate training and resources have been  
9 allocated. Within their 10 year framework for action, the Irish Government recognise the need for additional  
10 resources to be assigned and seek to *“mobilise the health services to better prevent and address overweight  
11 and obesity through effective community-based health promotion programmes”*[19] as well as providing  
12 training and skills development. Given this renewed commitment by the Irish Department of Health to  
13 empower community teams and communities, the road ahead looks promising.  
14

15  
16  
17  
18  
19  
20  
21  
22  
23  
24  
25 A key barrier to the implementation of *W82GO-community* was perceived parental resistance which occurred  
26 at the patient level but is also intrinsically linked to the external environment where the increasing  
27 normalisation of overweight and obesity coexists with a stigma that surrounds the issue. Stakeholders  
28 delivering the programme described parental resistance occurring at every stage of the implementation  
29 process and suggested that parents did not appear to recognise the issue in their own children. As a result  
30 stakeholders believed that parents did not see the need for treatment or refused to accept that their child was  
31 carrying excess weight. While parental attitudes reported in this study were based on the perceptions of staff,  
32 a lack of parental awareness regarding their child’s weight and resistance towards discussing weight issues has  
33 been documented in previous research [20-24]. This may be due in part to the belief that obesity has become  
34 the norm in society, a point which was suggested by stakeholders in this study, and previously outlined in the  
35 literature [25]. It is also possible that parental resistance stems from the stigma that is associated with excess  
36 weight and obesity [8, 21-23] or the negative media attention obesity has received. The framing of coverage by  
37 media may affect people’s views about the causes of childhood obesity and the most appropriate strategies  
38 for addressing the problem [26]. Our findings highlight the need, at a policy level, for positive awareness-  
39 raising campaigns to encourage parental recognition of healthy childhood growth and development, in  
40 addition to knowledge regarding the importance of identifying obesity early in childhood.  
41  
42  
43  
44  
45  
46  
47  
48  
49  
50  
51  
52  
53  
54  
55  
56  
57  
58  
59  
60

1  
2  
3 Low perceived self-efficacy in approaching the subject of weight with parents was a barrier facing staff during  
4 implementation. Stakeholders in this study see the need for a childhood weight management programme in  
5 their communities and acknowledge their professional responsibility to get involved. However, they appear  
6 uncomfortable and unequipped to do this. This is consistent with previous research which found that low  
7 perceived skills and low perceived self-efficacy hamper the implementation of such programmes [20, 27-30]. In  
8 our study motivational interviewing workshops equipped stakeholders in Site A with increased skills and  
9 confidence in working with families on weight management issues. Motivational interviewing is a goal-  
10 orientated, patient-centred approach based on the use of communication skills to understand individuals'  
11 motivation for behaviour change [31] and has been found to be useful when applied in health care settings  
12 [32]. We therefore consider it important that healthcare professionals involved in the implementation of  
13 obesity programmes receive this training prior to programme commencement.  
14  
15

16  
17  
18  
19  
20  
21  
22  
23  
24  
25 The multidisciplinary structure of the programme emerged as both a barrier to and facilitator of  
26 implementation and spread across many of the levels outlined by Grol and Wensing. While acknowledged that  
27 it was required to treat such a complex health issue, it resulted in lack of role clarity, a lack of understanding of  
28 specific discipline roles, and led to difficulties in scheduling. This may in part be due to the structure and  
29 governance of community health services within Ireland. While there is a vision for multidisciplinary working  
30 set out in multiple policy documents and an emphasis on integrated care [33], the system is not set-up to  
31 support the concept. Stakeholders believe a simple roundtable introduction whereby practitioners could share  
32 their professional background and outline their specific role within the project would have helped overcome  
33 this ambiguity. They suggest it is a simple but often overlooked detail. Furthermore, stakeholders feel the  
34 establishment of a local lead was critical in assisting multidisciplinary working while also facilitating discussion  
35 between national and local level. Laws et al. also highlight the importance of having key local individuals  
36 responsible for driving and coordinating research translation [34].  
37  
38  
39  
40  
41  
42  
43  
44  
45  
46  
47  
48

49 Finally, an important finding from this research was the inherent problems in a '*one size fits all*' approach to  
50 community-based treatment. Stakeholders in our study suggest a tiered approach may be more suitable,  
51 beginning with a brief intervention which intensifies based on a child's degree of obesity, the family's  
52 motivation, and the capacity of the community and/or healthcare provider. This finding is in line with a  
53 suggestion from Staniford et al. who suggest that future interventions should tailor treatment according to  
54  
55  
56  
57  
58  
59  
60

1  
2  
3 participants' age, degree of obesity and their readiness or confidence to change [35]. In addition to tailoring a  
4  
5 programme to the individual, programmes need to be adapted for the community setting. Stakeholders in our  
6  
7 study raised concerns that the W82GO programme, having been developed in a hospital setting, was too  
8  
9 medicalised for community practice. In particular, the lengthy assessment process which in some cases  
10  
11 involved blood tests and the presence of medically trained doctors, was unnecessary for a community-based  
12  
13 lifestyle programme. This finding is consistent with previous research conducted by Watson et al. who  
14  
15 evaluated a family-based childhood obesity treatment intervention and found they needed to modify the  
16  
17 assessment process by replacing community paediatrician assessments with parent/carer self-completion forms  
18  
19 for reasons of time and cost [36]. To develop a full picture of treatment, future research should examine what  
20  
21 aspects of the programme work, for whom, in what context and why.

22  
23 While this study provides important insight into the implementation of childhood obesity programme in the  
24  
25 community, several limitations should be acknowledged. According to de Casterlé *et al.*, (2012) "*using a*  
26  
27 *preconceived framework runs the risk of prematurely excluding alternative ways of organising the*  
28  
29 *data*"[37]pg.362. However, data was analysed inductively first before mapping emergent themes onto the Grol  
30  
31 and Wensing Framework. In subsequent phases of analysis we adapted the framework to capture the  
32  
33 influence of the external environment on implementation. Social desirability bias is a risk when stakeholders  
34  
35 are known to the researcher conducting the interviews. In this case the stakeholders knew the researcher as  
36  
37 the programme evaluator. However, we do not believe this bias had an effect as stakeholders were keen to  
38  
39 "*tell their story*". It is also important to note that parental attitudes reported in this study were based on the  
40  
41 perceptions of staff delivering the programme. Other studies have identified differences between parents,  
42  
43 staff and children in terms of their attitudes towards childhood obesity treatment [35]. We are conducting  
44  
45 further research with parents and children to understand the factors influencing their decisions to engage or  
46  
47 disengage with obesity treatment.

## 48 49 **CONCLUSION**

50  
51  
52 In light of the dearth of knowledge available on the translation of multi-component childhood weight  
53  
54 management programmes to community settings, this study highlights the barriers and facilitators to  
55  
56 implementing such programmes from a wide range of community healthcare and admin perspectives. Our  
57  
58 results suggest the assignment of clear roles and responsibilities, the provision of sufficient practical training  
59  
60

1  
2  
3 and resources, and organisational support play pivotal roles in overcoming barriers to change. Furthermore,  
4  
5 our findings on the challenges of multidisciplinary working and translating hospital programmes to community  
6  
7 settings are applicable to the implementation of interventions beyond that of childhood weight management.  
8  
9 This evidence should be used to develop implementation plans to improve the translation of interventions into  
10  
11 real world settings.

#### 12 13 **STATEMENTS:**

- 14  
15  
16 • Authors' contributions

17  
18 The authors responsibilities were as follows: EK: was responsible for the design and conduct of the research,  
19  
20 and writing of the manuscript. SMH: was involved in data analysis and reviewed drafts of the manuscript. EK,  
21  
22 SMH, JH, FS and IJP made critical revisions to the paper and gave final approval of the version to be submitted.  
23

- 24  
25  
26 • Acknowledgements

27  
28 We are grateful to the stakeholders who agreed to be interviewed for the study, without them this research  
29  
30 would not have been possible.

- 31  
32  
33 • Competing interests

34  
35 The authors declare that they have no competing interests

- 36  
37  
38 • Funding

39  
40 Source of support: E Kelleher is funded by the Health Research Board SPHeRE/2013/1. The Health Research  
41  
42 Board (HRB) supports excellent research that improves people's health, patient care and health service  
43  
44 delivery. We aim to ensure that new knowledge is created and then used in policy and practice. In doing so, we  
45  
46 support health system innovation and create new enterprise opportunities. Dr Sheena McHugh is funded by  
47  
48 the Centre for Ageing Research and Development in Ireland (CARDI), now the Ageing Research and  
49  
50 Development Division within the Institute of Public Health in Ireland (IPH).

- 51  
52  
53 • Data Sharing

54  
55 Topic guides which were used in the interviews are available as additional supporting files. However, signed  
56  
57 confidentiality agreements prevent us from sharing transcripts.



- Ethics approval

Ethical Approval was granted by the Clinical Research Ethics Committee of the Cork Teaching Hospitals.

### References

1. Flynn, M., D. McNeil, B. Maloff, et al., Reducing obesity and related chronic disease risk in children and youth: a synthesis of evidence with 'best practice' recommendations. *Obes Rev*, 2006. **7 Suppl 1**: p. 7-66.
2. Oude Luttikhuis, H., L. Baur, H. Jansen, et al., Interventions for treating obesity in children. *Cochrane Database Syst Rev*, 2009(1): p. Cd001872.
3. Wilfley, D., A. Staiano, M. Altman, et al., Improving access and systems of care for evidence-based childhood obesity treatment: Conference key findings and next steps. *Obesity* (Silver Spring), 2016.
4. National Institute for Health and Clinical Excellence (NICE). Weight management: lifestyle services for overweight or obese children and young people. Clinical Guideline, 47. 2013, NICE: London.
5. World Health Organisation., Report of the Commission on Ending Childhood Obesity. 2016, WHO Document Production Services: Geneva, Switzerland.
6. Nutbeam, D. and A. Bauman, Evaluation in a Nutshell: a practical guide to the evaluation of health promotion programs. Vol. 2. 2013, Australia: McGraw-Hill Education.
7. Welsby, D., B. Nguyen, B. O'Hara, et al., Process evaluation of an up-scaled community based child obesity treatment program: NSW Go4Fun(R). *BMC Public Health*, 2014. **14**: p. 140.
8. Lucas, P., K. Curtis-Tyler, L. Arai, et al., What works in practice: user and provider perspectives on the acceptability, affordability, implementation, and impact of a family-based intervention for child overweight and obesity delivered at scale. *BMC Public Health*, 2014. **14**: p. 614.
9. Stamatakis, K., C. Vinson, and J. Kerner, Dissemination and Implementation Research in Community and Public Health Settings, in *Dissemination and Implementation Research in Health: Translating Science to Practice*, R. Brownson, G. Colditz, and E. Proctor, Editors. 2012, Oxford University Press: New York.
10. Skelton, J. and B. Beech, Attrition in paediatric weight management: a review of the literature and new directions. *Obes Rev*, 2011. **12**(5): p. e273-81.
11. Kelleher, E., M. Davoren, J. Harrington, et al., Barriers and facilitators to initial and continued attendance at community-based lifestyle programmes among families of overweight and obese children: a systematic review. *Obes Rev*, 2016.
12. Keane, E., P. Kearney, I. Perry, et al., Trends and prevalence of overweight and obesity in primary school aged children in the Republic of Ireland from 2002-2012: a systematic review. *BMC Public Health*, 2014. **14**(1): p. 974.
13. Layte, R. and C. McCrory, Growing Up in Ireland. Overweight and Obesity among 9-year olds. 2011, Department of Children and Youth Affairs: Dublin.
14. O'Malley, G., A. Brinkley, K. Moroney, et al., Is the Temple Street W82GO Healthy Lifestyles Programme effective in reducing BMI SDS? . *Obes Facts*, 2012. **5**(Suppl. 1): p. 178-234
15. Hoffmann, T., P. Glasziou, I. Boutron, et al., Better reporting of interventions: template for intervention description and replication (TIDieR) checklist and guide. *BMJ*, 2014. **348**: p. g1687.
16. National Institute for Health and Clinical Excellence (NICE). Obesity. Guidance on the prevention of overweight and obesity in adults and children. Clinical Guideline, 43. 2015, NICE: London.

- 1
  - 2
  - 3
  - 4
  - 5
  - 6
  - 7
  - 8
  - 9
  - 10
  - 11
  - 12
  - 13
  - 14
  - 15
  - 16
  - 17
  - 18
  - 19
  - 20
  - 21
  - 22
  - 23
  - 24
  - 25
  - 26
  - 27
  - 28
  - 29
  - 30
  - 31
  - 32
  - 33
  - 34
  - 35
  - 36
  - 37
  - 38
  - 39
  - 40
  - 41
  - 42
  - 43
  - 44
  - 45
  - 46
  - 47
  - 48
  - 49
  - 50
  - 51
  - 52
  - 53
  - 54
  - 55
  - 56
  - 57
  - 58
  - 59
  - 60
17. Ritchie, J. and J. Lewis, *Qualitative research practice: a guide for social science students & researchers*. 2003, Thousand Oaks: Sage Publications.
18. Grol, R. and M. Wensing, What drives change? Barriers to and incentives for achieving evidence-based practice. *Med J Aust*, 2004. **180**(6 Suppl): p. S57-60.
19. Department of Health., *A Healthy Weight for Ireland. Obesity Policy and Action Plan: 2016–2025*. 2016: Dublin.
20. Gerards, S.M., P. Dagnelie, M. Jansen, et al., Barriers to successful recruitment of parents of overweight children for an obesity prevention intervention: a qualitative study among youth health care professionals. *BMC Fam Pract*, 2012. **13**: p. 37.
21. Grow, H., C. Hsu, L. Liu, et al., Understanding family motivations and barriers to participation in community-based programs for overweight youth: one program model does not fit all. *J Public Health Manag Pract*, 2013. **19**(4): p. E1-e10.
22. Visram, S., T.D. Hall, and L. Geddes, Getting the balance right: qualitative evaluation of a holistic weight management intervention to address childhood obesity. *J Public Health (Oxf)*, 2012.
23. Newson, L., R. Povey, A. Casson, et al., The experiences and understandings of obesity: families' decisions to attend a childhood obesity intervention. *Psychol Health*, 2013. **28**(11): p. 1287-305.
24. Shiely, F., N. Hon Yan, E. Berkery, et al., The association between weight perception and BMI: Report and measurement data from the growing up in Ireland cohort study of 9 year olds. *Int J Obes*, 2016.
25. Binkin, N., A. Spinelli, G. Baglio, et al., What is common becomes normal: the effect of obesity prevalence on maternal perception. *Nutr Metab Cardiovasc Dis*, 2013. **23**(5): p. 410-6.
26. Barry, C., M. Jarlenski, R. Grob, et al., News Media Framing of Childhood Obesity in the United States From 2000 to 2009. *Pediatrics*, 2011.
27. Moyers, P., L. Bugle, and E. Jackson, Perceptions of school nurses regarding obesity in school-age children. *J Sch Nurs*, 2005. **21**(2): p. 86-93.
28. Steele, R., Y. Wu, C. Jensen, et al., School nurses' perceived barriers to discussing weight with children and their families: a qualitative approach. *J Sch Health*, 2011. **81**(3): p. 128-37.
29. Story, M., D. Neumark-Stzainer, N. Sherwood, et al., Management of child and adolescent obesity: attitudes, barriers, skills, and training needs among health care professionals. *Pediatrics*, 2002. **110**(1 Pt 2): p. 210-4.
30. Turner, K., J. Shield, and C. Salisbury, Practitioners' views on managing childhood obesity in primary care: a qualitative study. *The British J of Gen Pract*, 2009. **59**(568): p. 856-862.
31. Miller, W. and S. Rollnick, *Motivational Interviewing: Preparing people for change*. 2002, New York: The Guilford Press.
32. Lozano, P., H. McPhillips, B. Hartzler, et al., Randomized trial of teaching brief motivational interviewing to pediatric trainees to promote healthy behaviors in families. *Arch Pediatr Adolesc Med*, 2010. **164**(6): p. 561-6.
33. Department of Health., *A Healthy Weight for Ireland 2016–2025. Obesity Policy and Action Plan 2016*, Stationary Office: Dublin.
34. Laws, R., K. Hesketh, K. Ball, et al., Translating an early childhood obesity prevention program for local community implementation: a case study of the Melbourne InFANT Program. *BMC Public Health*, 2016. **16**: p. 748.
35. Staniford, L.J., J.D. Breckon, R.J. Copeland, et al., Key stakeholders' perspectives towards childhood obesity treatment: A qualitative study. *Journal of Child Health Care*, 2011. **15**(3): p. 230-244.
36. Watson, P., L. Dugdill, K. Pickering, et al., Service evaluation of the GOALS family-based childhood obesity treatment intervention during the first 3 years of implementation. *BMJ Open*, 2015. **5**(2).

- 1  
2  
3 37. Dierckx de Casterle, B., C. Gastmans, E. Bryon, et al., QUAGOL: a guide for qualitative data  
4 analysis. *Int J Nurs Stud*, 2012. **49**(3): p. 360-71.  
5  
6  
7  
8  
9  
10  
11  
12  
13  
14  
15  
16  
17  
18  
19  
20  
21  
22  
23  
24  
25  
26  
27  
28  
29  
30  
31  
32  
33  
34  
35  
36  
37  
38  
39  
40  
41  
42  
43  
44  
45  
46  
47  
48  
49  
50  
51  
52  
53  
54  
55  
56  
57  
58  
59  
60

For peer review only

## Supplementary Material 1: Completed TIDieR checklist

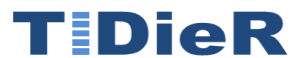

Template for Intervention  
Description and Replication

## The TIDieR (Template for Intervention Description and Replication) Checklist

Information to include when describing an intervention and the location of the information

| Item number | Item                                                                                   |                                                                                                                                                                                                                                                                                                                                                                                                                                                                                                                                                                                                                                                                                                                                                                                                                                                                                     |
|-------------|----------------------------------------------------------------------------------------|-------------------------------------------------------------------------------------------------------------------------------------------------------------------------------------------------------------------------------------------------------------------------------------------------------------------------------------------------------------------------------------------------------------------------------------------------------------------------------------------------------------------------------------------------------------------------------------------------------------------------------------------------------------------------------------------------------------------------------------------------------------------------------------------------------------------------------------------------------------------------------------|
|             | <b>BRIEF NAME</b>                                                                      |                                                                                                                                                                                                                                                                                                                                                                                                                                                                                                                                                                                                                                                                                                                                                                                                                                                                                     |
| 1.          | Provide the name or a phrase that describes the intervention.                          | 'W82GO-community' – a multi-component, family-focused childhood weight management pilot programme delivered in the community setting.                                                                                                                                                                                                                                                                                                                                                                                                                                                                                                                                                                                                                                                                                                                                               |
|             | <b>WHY</b>                                                                             |                                                                                                                                                                                                                                                                                                                                                                                                                                                                                                                                                                                                                                                                                                                                                                                                                                                                                     |
| 2.          | Describe any rationale, theory, or goal of the elements essential to the intervention. | The W82GO-community programme is a family-focused programme grounded in behavioural change theory (transtheoretical model and social cognitive theory) and aims to reduce obesity in children with BMI $\geq$ 98th percentile, improve children's dietary intake, physical activity levels and weight status while also increasing children's quality of life and psychosocial health. During initial assessments the families' attitudes and behaviours related to health promotion are identified and specific and achievable goals are set. In attaining these goals, a number of sub-behaviours are promoted including self-efficacy, self-monitoring and self-management. At every stage of the process the team aims to empower the family to recognise and make the necessary changes to bring about positive lifestyle changes and motivate them to maintain these changes. |

**WHAT**

1  
2 **3.** Materials: Describe any physical or informational materials used in the  
3 intervention, including those provided to participants or used in  
4 intervention delivery or in training of intervention providers. Provide  
5 information on where the materials can be accessed (e.g. online  
6 appendix, URL).  
7  
8  
9

The *W82GO-community* programme includes:

- (1) The *W82GO-community* pilot programme was delivered by a multi-disciplinary team using a manual developed to support community-based healthcare professionals to deliver the programme in their area. It does so through the provision of a guide to setting up a team and preparing the delivery of the programme; a framework for individual sessions that allows for session preparation and planning including programme presentations on disc; materials, including template letters and evaluation forms that can be adapted to suit the local context and information on additional resources that are available to support the team
- (2) W82GO leaflet outlining the programmes goals and core elements to be distributed to families during recruitment
- (3) W82GO family information booklet including goal setting and additional resources and tips were distributed to all families attending the programme

10  
11  
12  
13  
14  
15  
16  
17  
18  
19  
20  
21  
22  
23  
24  
25  
26  
27  
28  
29  
30 **4.** Procedures: Describe each of the procedures, activities, and/or  
31 processes used in the intervention, including any enabling or support  
32 activities.  
33  
34  
35  
36  
37  
38  
39  
40  
41  
42  
43

Recruitment: heights and weights were measured in school by public health nurses (PHNs) using standardised procedures. Weight and height data was subsequently used to calculate body mass index (BMI) and children were classified as obese if their BMI plotted  $\geq 98$ th BMI percentile for age and gender using the UK90 recommended cut-off points for treatment or referral which are currently used in Irish practice. Parents of children meeting this eligibility criterion were contacted by their school PHN to inform them of their child's weight status and those who indicated an interest in attending the

programme were subsequently invited to attend an initial screening assessment.

This individualised initial assessment assessed eligibility before programme commencement. This assessment was carried out by a multidisciplinary team to rule out underlying medical conditions. In addition, indicators of health literacy, health beliefs and physical and environmental variables that might act as barriers to change were recorded.

Following the initial assessment six group sessions took place over six weeks and group booster sessions occurred at three, six and nine months. During these group sessions parents and their children received an educational session for the first hour. Children were taken out to complete physical activity for the last 30 minutes while parents received an extra educational session. At 12 months another individualised final assessment took place to document any changes and make plans for sustainment.

#### WHO PROVIDED

5. For each category of intervention provider (e.g. psychologist, nursing assistant), describe their expertise, background and any specific training given.

The W82GO community-programme was delivered by a multidisciplinary team of community health professionals including dietitians, physiotherapists, public health nurses, psychologists, health promotion officers, area medical officers, administrators and local area management. These health professionals had varying levels of experience of dealing with childhood obesity and as a result were invited to take part in a training programme prior to programme commencement. Training included a needs assessment, a one day educational training course and two days of clinical shadowing with an experienced W82GO programme practitioner at Temple Street Children's University Hospital in

Dublin, Ireland. Each community practitioner was also supplied with a user manual which outlined the programme and detailed the content for both phases.

Public health nurses in one of the sites received motivational interviewing training specific to childhood obesity as part of routine training in the area already being conducted in that area.

#### HOW

6. Describe the modes of delivery (e.g. face-to-face or by some other mechanism, such as internet or telephone) of the intervention and whether it was provided individually or in a group.

The W82GO-community programme involved face-to-face sessions and included a mixture of group and individualised sessions as outlined above.

#### WHERE

7. Describe the type(s) of location(s) where the intervention occurred, including any necessary infrastructure or relevant features.

Initial assessments took place in community healthcare offices. Subsequent group sessions were delivered on weekdays in the afternoon at a local sports or community centre.

#### WHEN and HOW MUCH

8. Describe the number of times the intervention was delivered and over what period of time including the number of sessions, their schedule, and their duration, intensity or dose.

The programme was run in two sites (Site A and Site B) over 12 months. The individual assessment lasted approximately one and half to two hours. The initial intensive phase consisted of 6 weekly group sessions for both the child and his/her parent/carer and these occurred over one afternoon a week and lasted approximately one and a half to two hours. The three booster sessions at three, six and nine months lasted approximately one to one and a half hours. During these group sessions parents and their children received an educational session for the first hour. Children were taken out to complete physical activity

for the last 30 minutes while parents received an extra educational session. Upon completion of the 12 month programme children and their parents/carer return for a final assessment lasting approx. one and half to two hours. This model of implementation is in keeping with the transtheoretical model of behaviour change.

### TAILORING

9. If the intervention was planned to be personalised, titrated or adapted, then describe what, why, when, and how.

All families received the same intervention.

### MODIFICATIONS

10.‡ If the intervention was modified during the course of the study, describe the changes (what, why, when, and how).

Two sites delivered the pilot programme to their respective communities. Site A decided to separate children and parents from the start of the group sessions because they felt children of this age would not gain anything nor were likely to understand the educational sessions. Children received a full physical activity session instead while parents received the educational session alone.

Owing to low numbers attending the programme in Site B programme staff chose not to go ahead with the final assessment at 12 months and instead conducted the final assessments during the third booster session.

### HOW WELL

11. Planned: If intervention adherence or fidelity was assessed, describe how and by whom, and if any strategies were used to maintain or improve fidelity, describe them.

Fidelity of intervention delivery was assessed using trainer self-reports and exit interviews.

12.‡ Actual: If intervention adherence or fidelity was assessed, describe the extent to which the intervention was delivered as planned.

In Site A, the programme was delivered in a more interactive manner (i.e. without the use of programme slides). Site B followed the manuals as planned.

\*\* **Authors** - use N/A if an item is not applicable for the intervention being described. **Reviewers** – use '?' if information about the element is not reported/not sufficiently reported.



1 † If the information is not provided in the primary paper, give details of where this information is available. This may include locations such as a published protocol or other published  
2 papers (provide citation details) or a website (provide the URL).

3 ‡ If completing the TIDieR checklist for a protocol, these items are not relevant to the protocol and cannot be described until the study is complete.

4 \* We strongly recommend using this checklist in conjunction with the TIDieR guide (see *BMJ* 2014;348:g1687) which contains an explanation and elaboration for each item.

5  
6 \* The focus of TIDieR is on reporting details of the intervention elements (and where relevant, comparison elements) of a study. Other elements and methodological features of studies are  
7 covered by other reporting statements and checklists and have not been duplicated as part of the TIDieR checklist. When a **randomised trial** is being reported, the TIDieR checklist should be  
8 used in conjunction with the CONSORT statement (see [www.consort-statement.org](http://www.consort-statement.org)) as an extension of **Item 5 of the CONSORT 2010 Statement**. When a **clinical trial protocol** is being  
9 reported, the TIDieR checklist should be used in conjunction with the SPIRIT statement as an extension of **Item 11 of the SPIRIT 2013 Statement** (see [www.spirit-statement.org](http://www.spirit-statement.org)). For  
10 alternate study designs, TIDieR can be used in conjunction with the appropriate checklist for that study design (see [www.equator-network.org](http://www.equator-network.org)).  
11  
12  
13  
14  
15  
16  
17  
18  
19  
20  
21  
22  
23  
24  
25  
26  
27  
28  
29  
30  
31  
32  
33  
34  
35  
36  
37  
38  
39  
40  
41  
42  
43  
44  
45  
46  
47

## COREQ Checklist for Qualitative Research:

| No. Item                                       | Guide questions/description                                                                                                                              | Reported on Page # |
|------------------------------------------------|----------------------------------------------------------------------------------------------------------------------------------------------------------|--------------------|
| <b>Domain 1: Research team and reflexivity</b> |                                                                                                                                                          |                    |
| <i>Personal Characteristics</i>                |                                                                                                                                                          |                    |
| 1. Interviewer/facilitator                     | Which author/s conducted the interview or focus group?                                                                                                   | Pg. 6              |
| 2. Credentials                                 | What were the researcher's credentials?<br>E.g. PhD, MD                                                                                                  | Pg. 1, 6 & 7       |
| 3. Occupation                                  | What was their occupation at the time of the study?                                                                                                      | Pg. 1, 6           |
| 4. Gender                                      | Was the researcher male or female?                                                                                                                       | Pg. 1,6            |
| 5. Experience and training                     | What experience or training did the researcher have?                                                                                                     | Pg. 6              |
| <i>Relationship with participants</i>          |                                                                                                                                                          |                    |
| 6. Relationship established                    | Was a relationship established prior to study commencement?                                                                                              | Pg. 3              |
| 7. Participant knowledge of the interviewer    | What did the participants know about the researcher? e.g. personal goals, reasons for doing the research                                                 | Pg. 15             |
| 8. Interviewer characteristics                 | What characteristics were reported about the interviewer/facilitator? e.g. Bias, assumptions, reasons and interests in the research topic                | Pg. 1,3,6          |
| <b>Domain 2: study design</b>                  |                                                                                                                                                          |                    |
| <i>Theoretical framework</i>                   |                                                                                                                                                          |                    |
| 9. Methodological orientation and Theory       | What methodological orientation was stated to underpin the study? e.g. grounded theory, discourse analysis, ethnography, phenomenology, content analysis | Pg. 6-7            |
| <i>Participant selection</i>                   |                                                                                                                                                          |                    |
| 10. Sampling                                   | How were participants selected? e.g. purposive, convenience, consecutive, snowball                                                                       | Pg. 6              |
| 11. Method of approach                         | How were participants approached? e.g. face-to-face, telephone, mail, email                                                                              | Pg. 6              |
| 12. Sample size                                | How many participants were in the study?                                                                                                                 | Pg. 7              |
| 13. Non-participation                          | How many people refused to participate or dropped out? Reasons?                                                                                          | Pg. 7              |
| <i>Setting</i>                                 |                                                                                                                                                          |                    |
| 14. Setting of data collection                 | Where was the data collected? e.g. home, clinic, workplace                                                                                               | Pg. 6              |
| 15. Presence of non-participants               | Was anyone else present besides the participants and researchers?                                                                                        | NA                 |
| 16. Description of sample                      | What are the important characteristics of the sample? e.g. demographic data, date                                                                        | Pg. 7              |
| <i>Data collection</i>                         |                                                                                                                                                          |                    |

|                                        |                                                                                                                                 |                                                  |
|----------------------------------------|---------------------------------------------------------------------------------------------------------------------------------|--------------------------------------------------|
| 17. Interview guide                    | Were questions, prompts, guides provided by the authors? Was it pilot tested?                                                   | Pg. 6                                            |
| 18. Repeat interviews                  | Were repeat interviews carried out? If yes, how many?                                                                           | NA                                               |
| 19. Audio/visual recording             | Did the research use audio or visual recording to collect the data?                                                             | Pg. 6                                            |
| 20. Field notes                        | Were field notes made during and/or after the interview or focus group?                                                         | Yes                                              |
| 21. Duration                           | What was the duration of the interviews or focus group?                                                                         | Pg. 6                                            |
| 22. Data saturation                    | Was data saturation discussed?                                                                                                  | Pg. 6                                            |
| 23. Transcripts returned               | Were transcripts returned to participants for comment and/or correction?                                                        | No                                               |
| <b>Domain 3: analysis and findings</b> |                                                                                                                                 |                                                  |
| <i>Data analysis</i>                   |                                                                                                                                 |                                                  |
| 24. Number of data coders              | How many data coders coded the data?                                                                                            | Pg. 7                                            |
| 25. Description of the coding tree     | Did authors provide a description of the coding tree?                                                                           | N/A                                              |
| 26. Derivation of themes               | Were themes identified in advance or derived from the data?                                                                     | Pg. 7                                            |
| 27. Software                           | What software, if applicable, was used to manage the data?                                                                      | Pg. 7                                            |
| 28. Participant checking               | Did participants provide feedback on the findings?                                                                              | NA                                               |
| <i>Reporting</i>                       |                                                                                                                                 |                                                  |
| 29. Quotations presented               | Were participant quotations presented to illustrate the themes/findings? Was each quotation identified? e.g. participant number | Pg. 8-13                                         |
| 30. Data and findings consistent       | Was there consistency between the data presented and the findings?                                                              | Pg. 8-13                                         |
| 31. Clarity of major themes            | Were major themes clearly presented in the findings?                                                                            | Pg. 8-13                                         |
| 32. Clarity of minor themes            | Is there a description of diverse cases or discussion of minor themes?                                                          | Discussion of major and minor themes<br>Pg. 8-13 |
